# Supplementary material
Source: publisher figshare collection journal article supplement (https://acs.figshare.com/ndownloader/files/20979204)
Supplement: Supplementary file 1 [file 20979204]

# **Fluoromethoxymethylation of Nitrogen Heterocyclic Compounds with Fluoromethyl Iodide**

Rongkang Wang , Tianqi Ding, Lvqi Jiang\*, Wujuan He, Wenbin Yi\*

## **Table of Contents**

|                                                   |     |
|---------------------------------------------------|-----|
| 1. Mechanistic Studies.....                       | S2  |
| 2. NMR Spectra.....                               | S4  |
| 3. X-Ray Crystallographic Data of <b>3q</b> ..... | S46 |

## 1. Mechanistic Studies

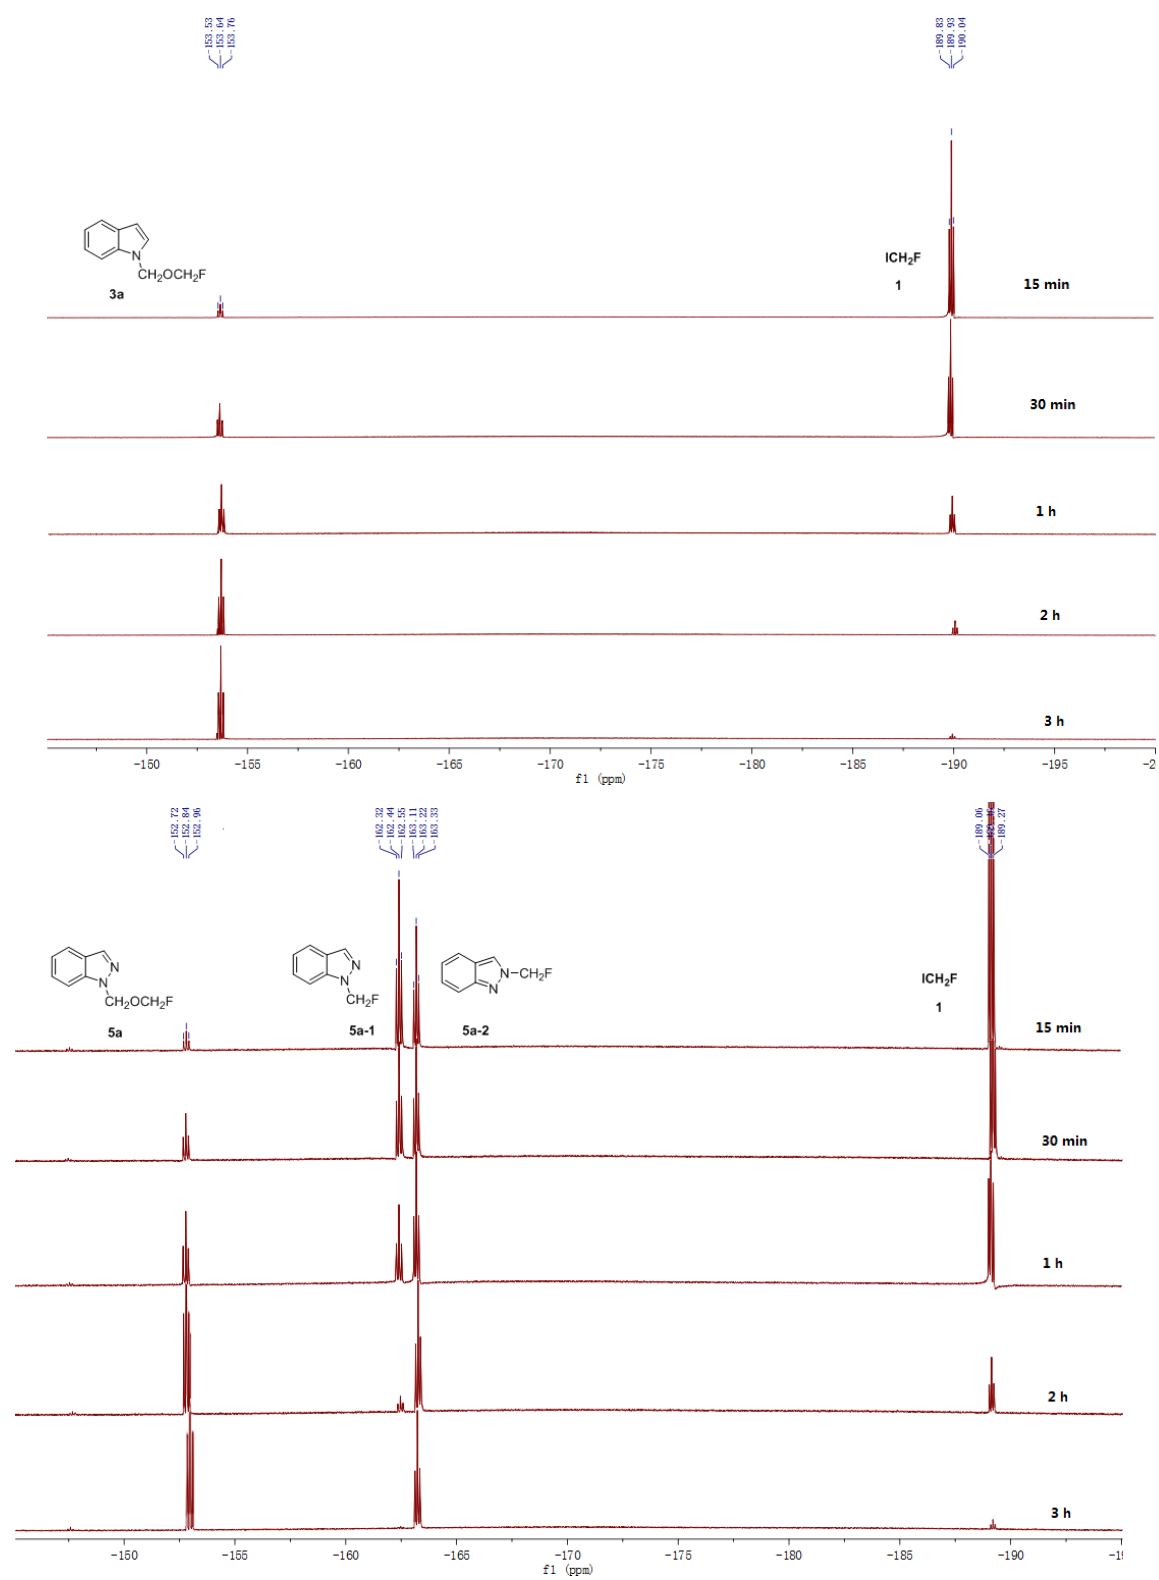

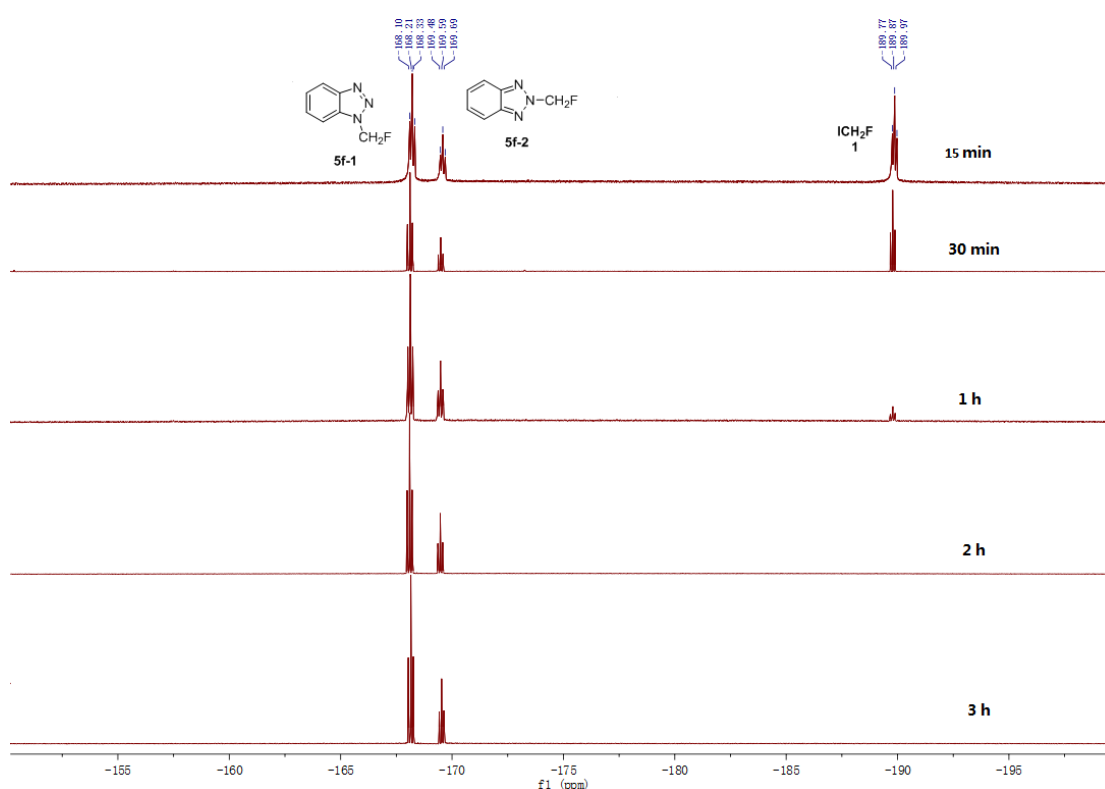

**Figure S1.** Progress of the reaction of **2a**, **4a** and **4f**, for up to 3 h, by  $^{19}\text{F}$  NMR spectroscopy.

To understand the mechanism of this fluoromethoxymethyl reaction, we decided to trace the reactions by  $^{19}\text{F}$  NMR in three cases (**2a**, **4a** and **4f**). The results were displayed in Figure S1. During the 3 hours reaction process of reaction with **2a**, only two singals including those for the reagent **1** ( $\delta$  -189.9 ppm) and product **3a** ( $\delta$  -153.6 ppm) were observed. The amount of  $\text{ICH}_2\text{F}$  decreased and the desired product **3a** increased during the reaction process. For *1H*-indazole **4a**, the signals were very different. In spite of reagent **1** and product **5a**, two new singals were obtained:  $\delta$  -162.5 ppm (**5a-1**) and  $\delta$  -163.2 ppm (**5a-2**), which were two  $\text{CH}_2\text{F}$ -substituted products<sup>1</sup>. It was obvious that **5a-1** decreased accompanied by the increase of product **5a**, while another signal of  $\delta$  -163.2 ppm (**5a-2**) was observed with no significant change. This indicated that only one  $\text{CH}_2\text{F}$ -substituted intermediate (**5a-1**) could convert to the final product **5a**.<sup>2</sup> For the case of *1H*-benzotriazole **4f**, it was similar that two  $\text{CH}_2\text{F}$ -substituted products **5f-1** ( $\delta$  -168.2 ppm) and **5f-2** ( $\delta$  -169.6 ppm) were observed, but neither could transfer to the  $\text{CH}_2\text{OCH}_2\text{F}$  product.

#### References:

1. Zhang, W.; Zhu, L.; Hu, J. Electrophilic monofluoromethylation of O-, S-, and N-nucleophiles with chlorofluoromethane. *Tetrahedron*. **2007**, 63, 10569-10575.
2. The structure of  $\text{CH}_2\text{F}$ -substituted intermediates **5a-1** and **5a-2** were confirmed by comparing  $^{13}\text{C}$  NMR spectra with the similar  $\text{CH}_3$ -substituted compounds: a) Cheung, M.; Bloor, A.; Stafford, J. A. Efficient and Regioselective Synthesis of 2-Alkyl-2*H*-indazoles. *J. Org. Chem.* **2003**, 68, 4093-4095; b) Liu, H.-J.; Hung, S.-F.; Chen, C.-L.; Lin, M.-H. A method for the regioselective synthesis of 1-alkyl-1*H*-indazoles. *Tetrahedron*. **2013**, 69, 3907-3912.

## 2. NMR Spectra

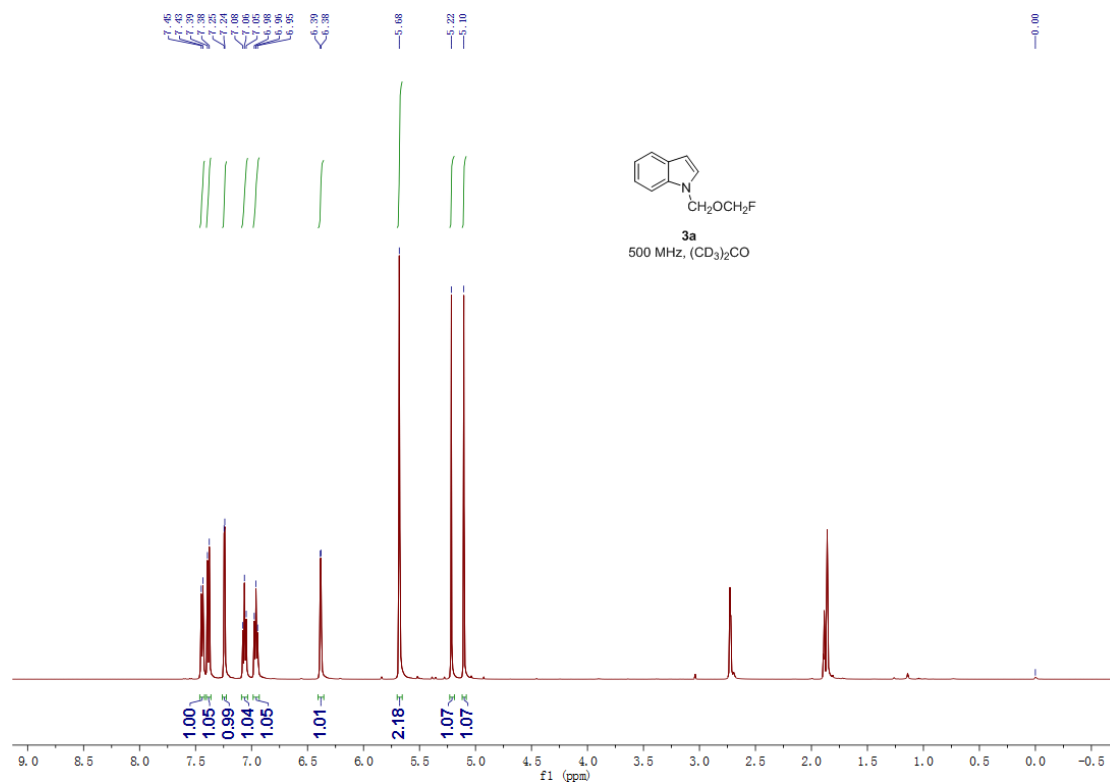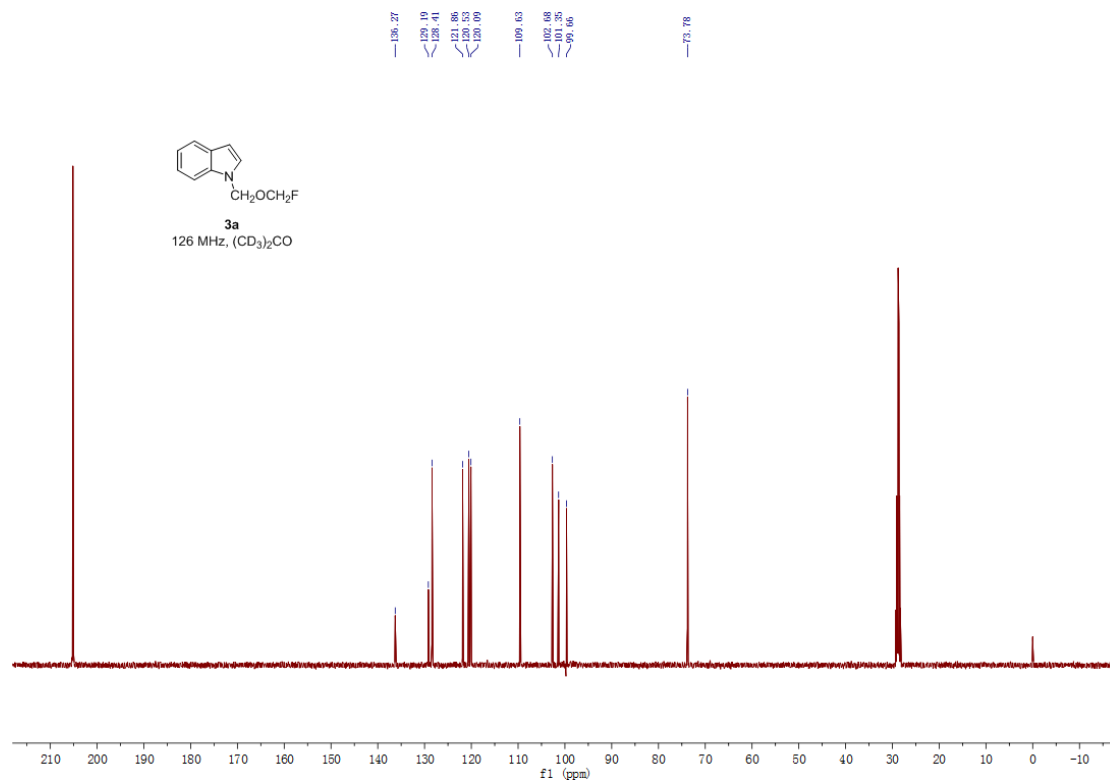

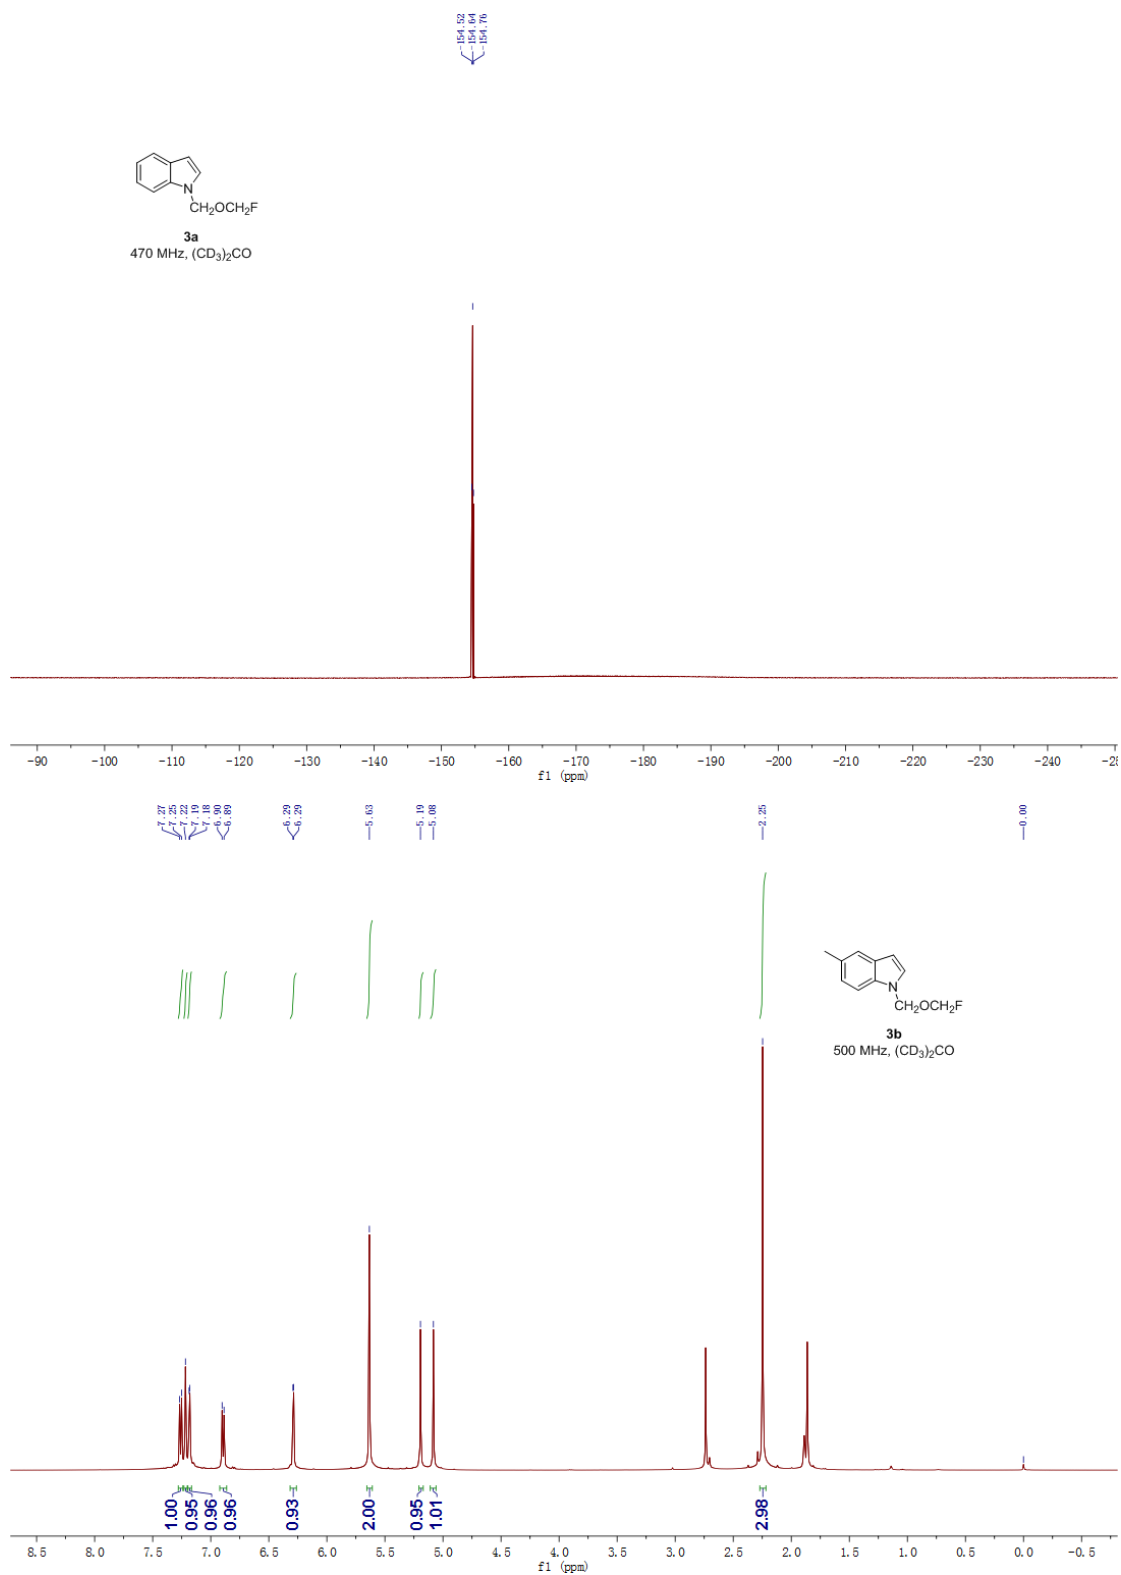

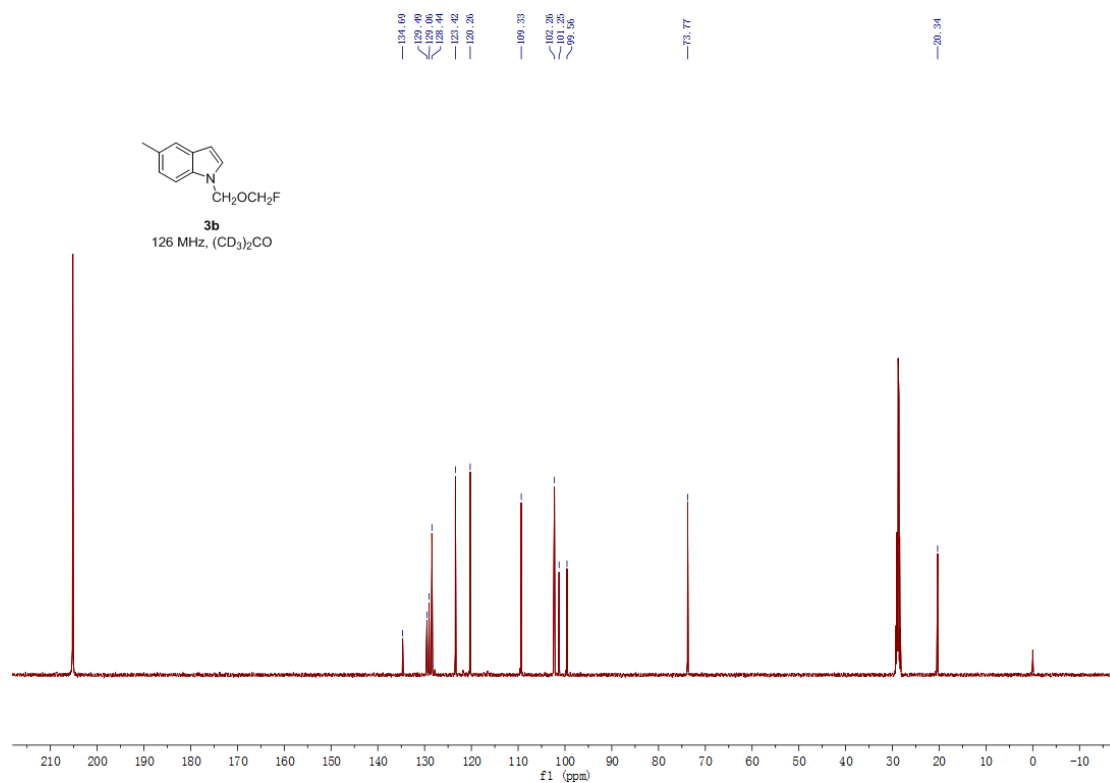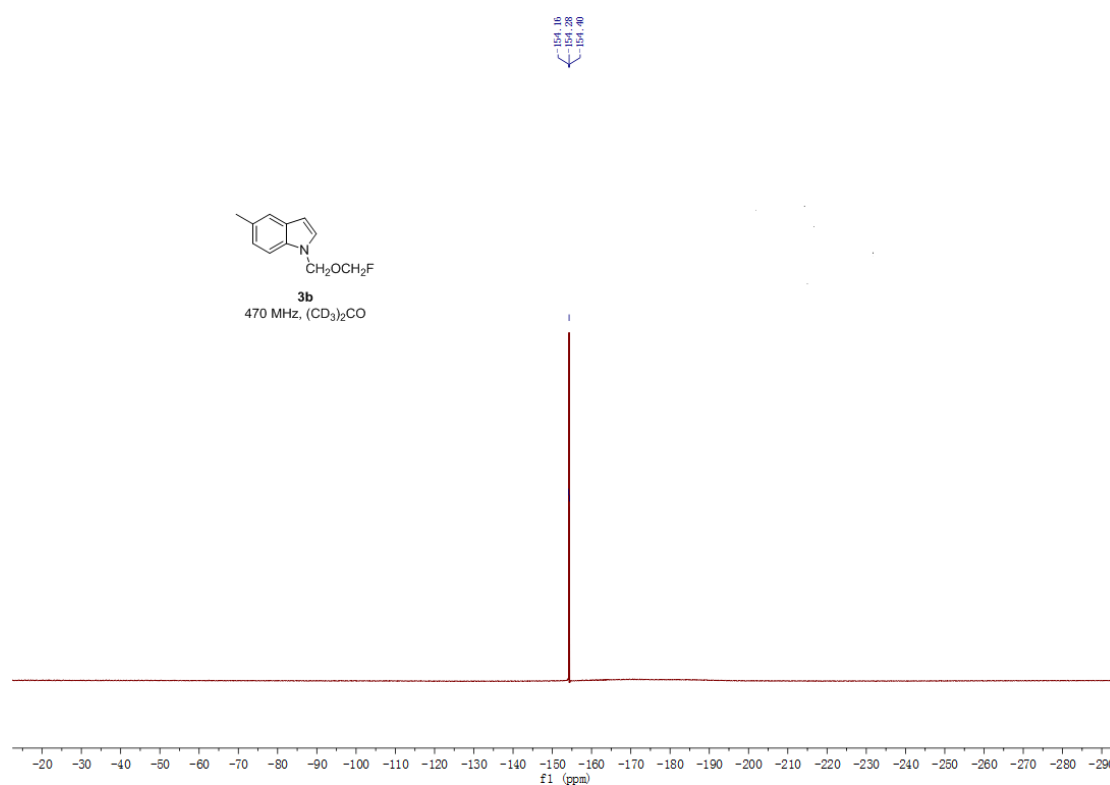

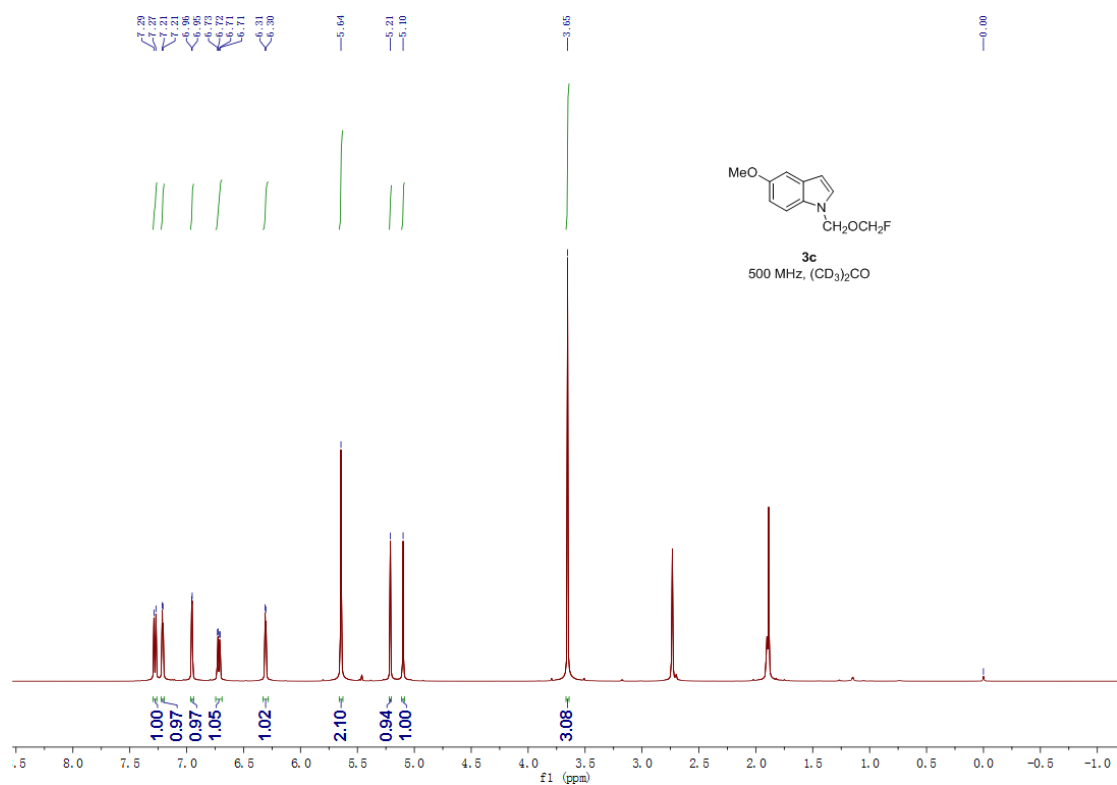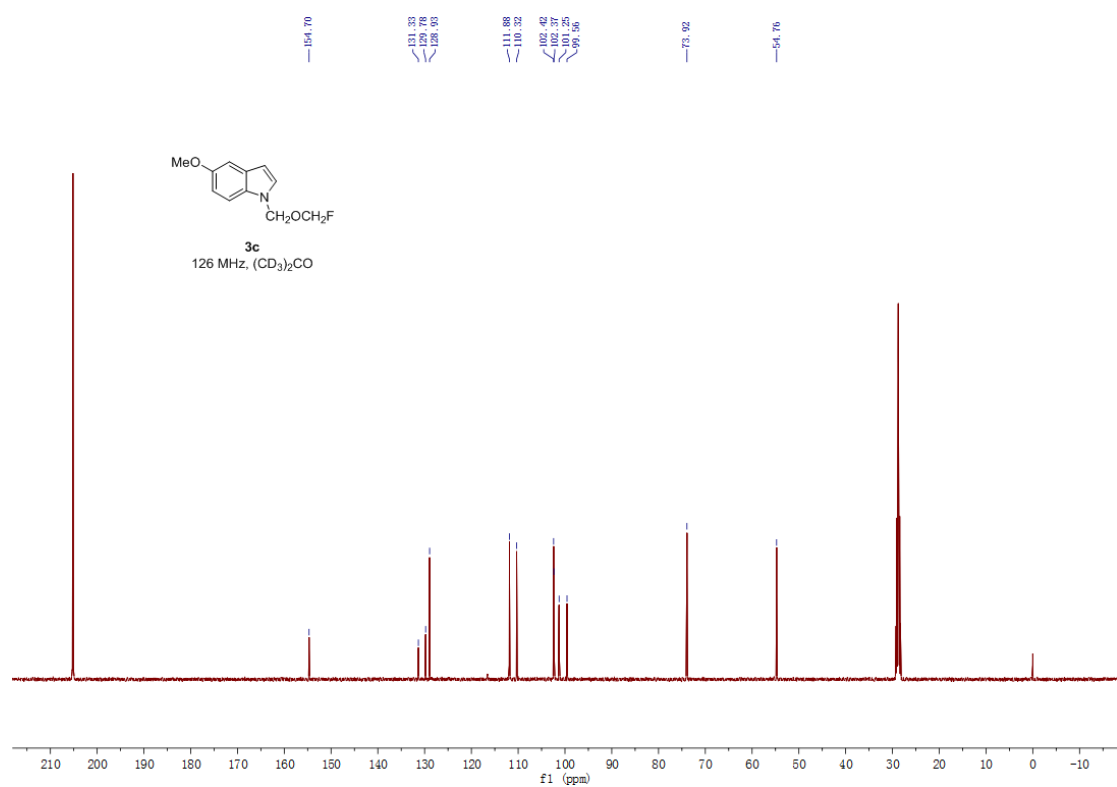

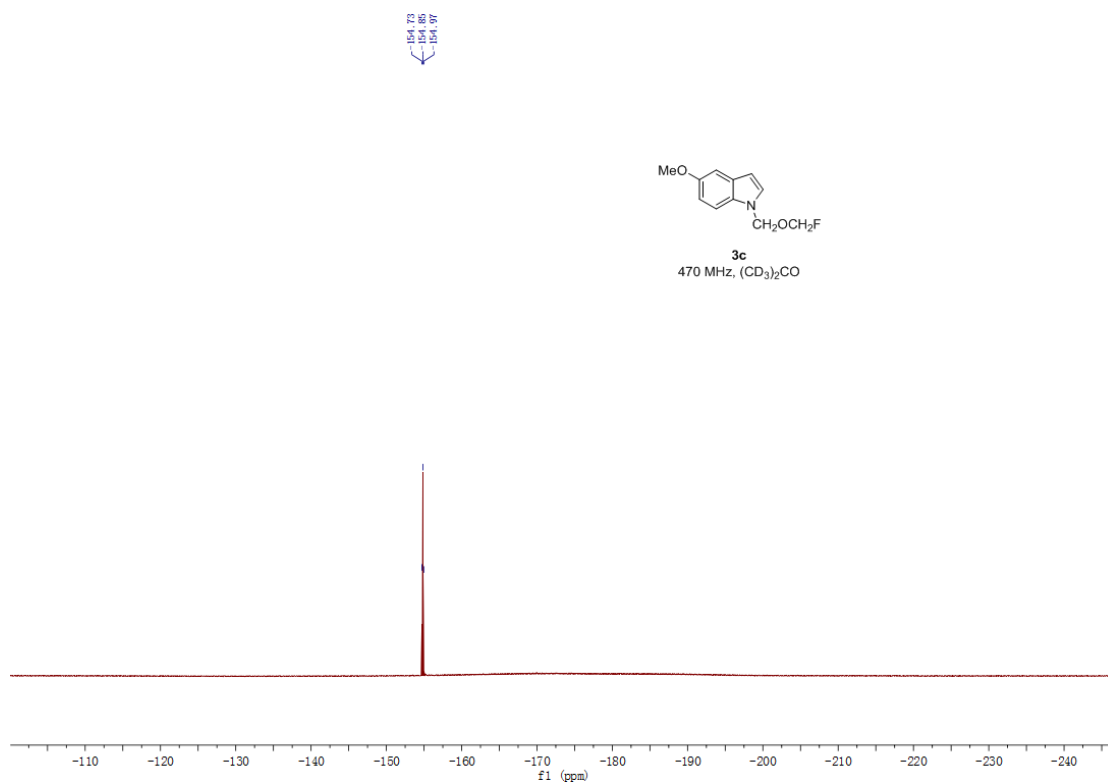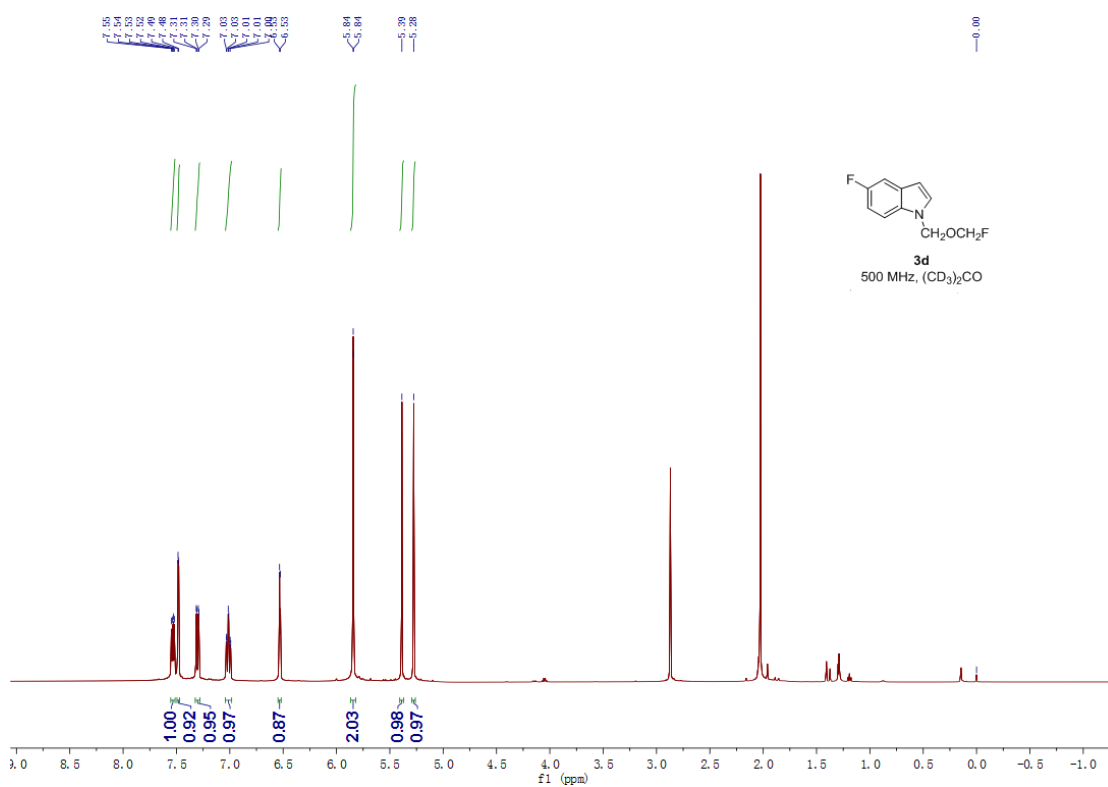

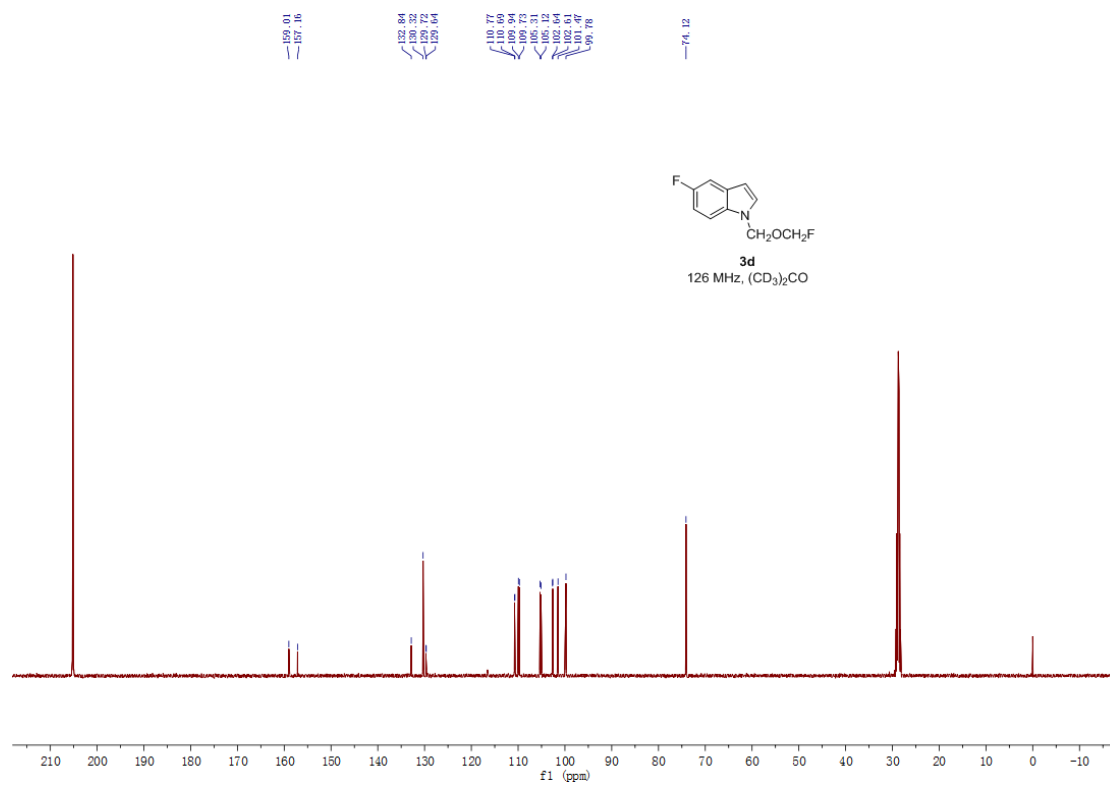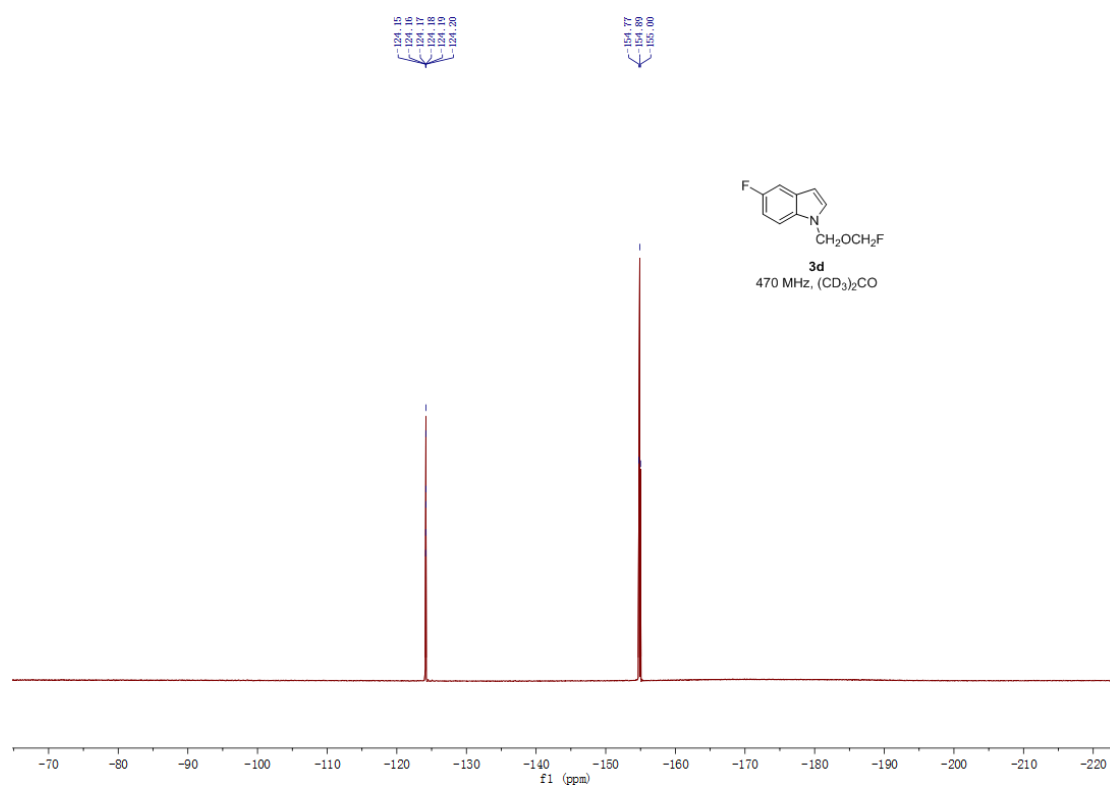

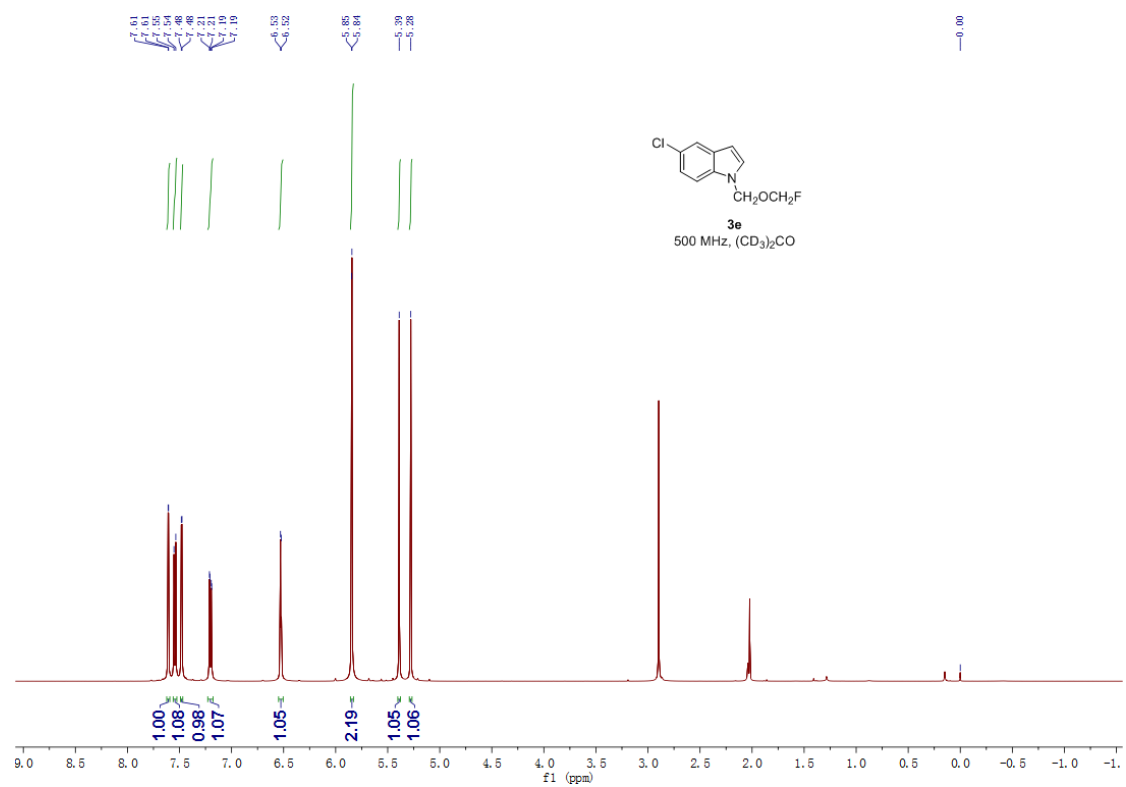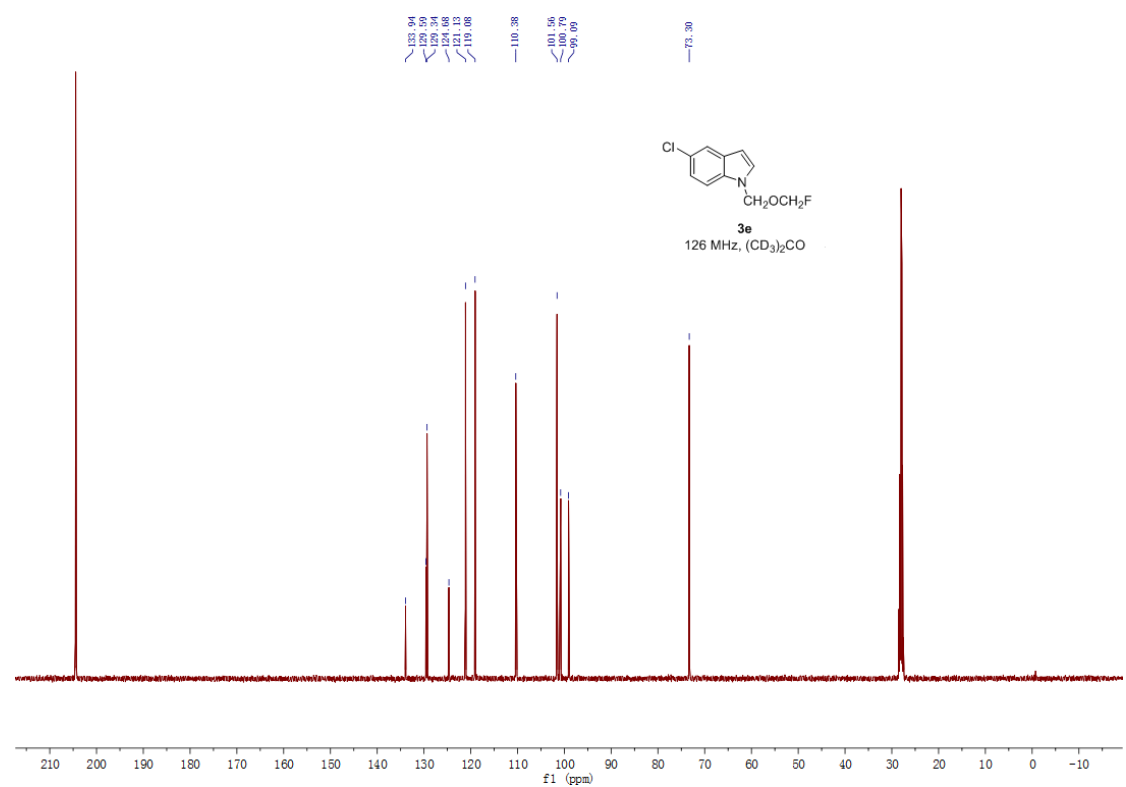

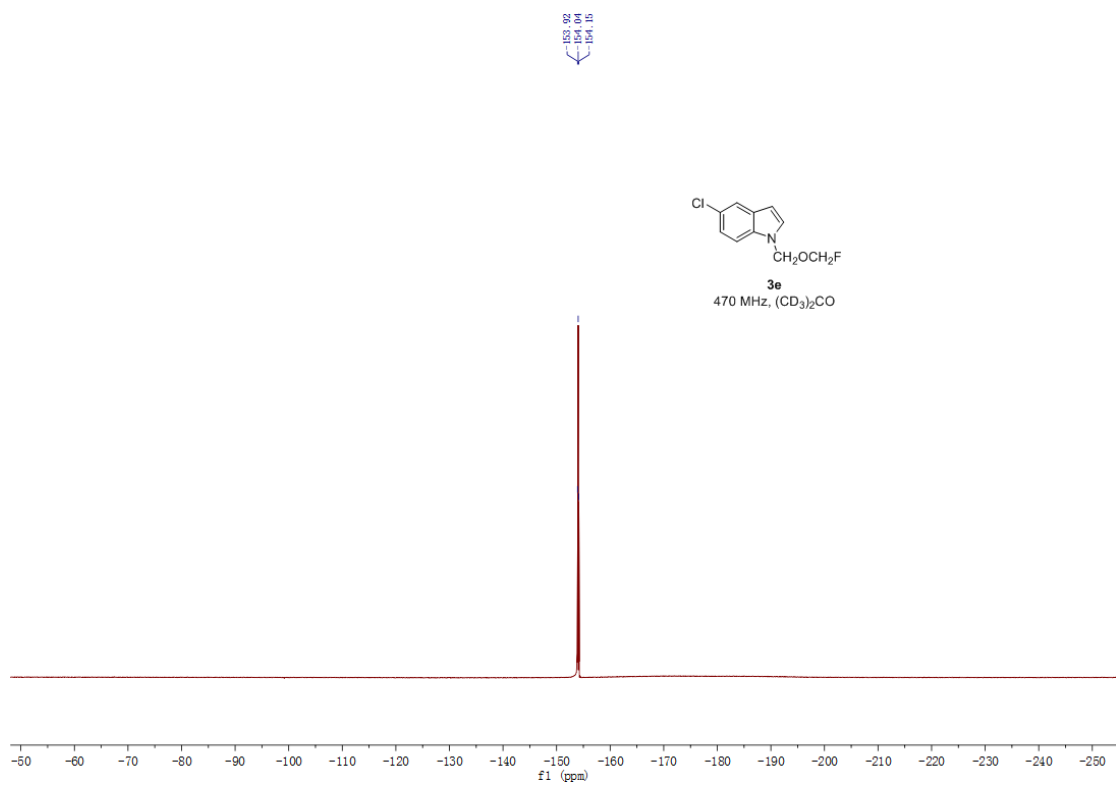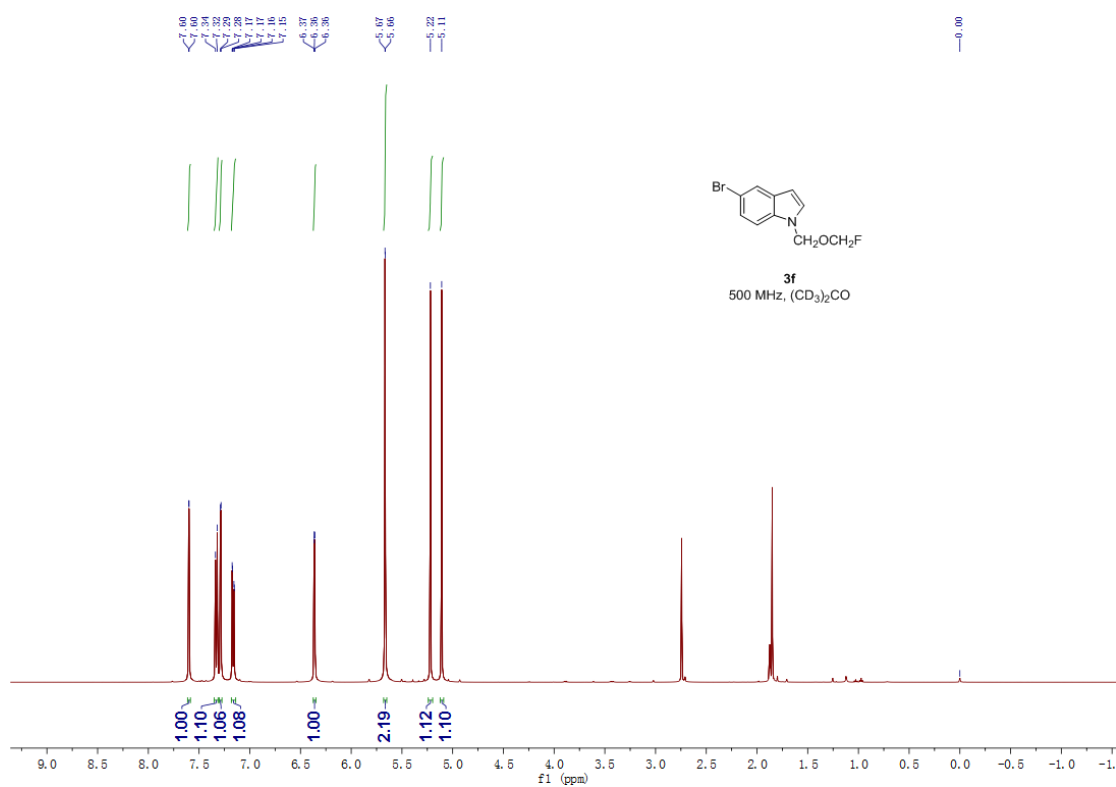

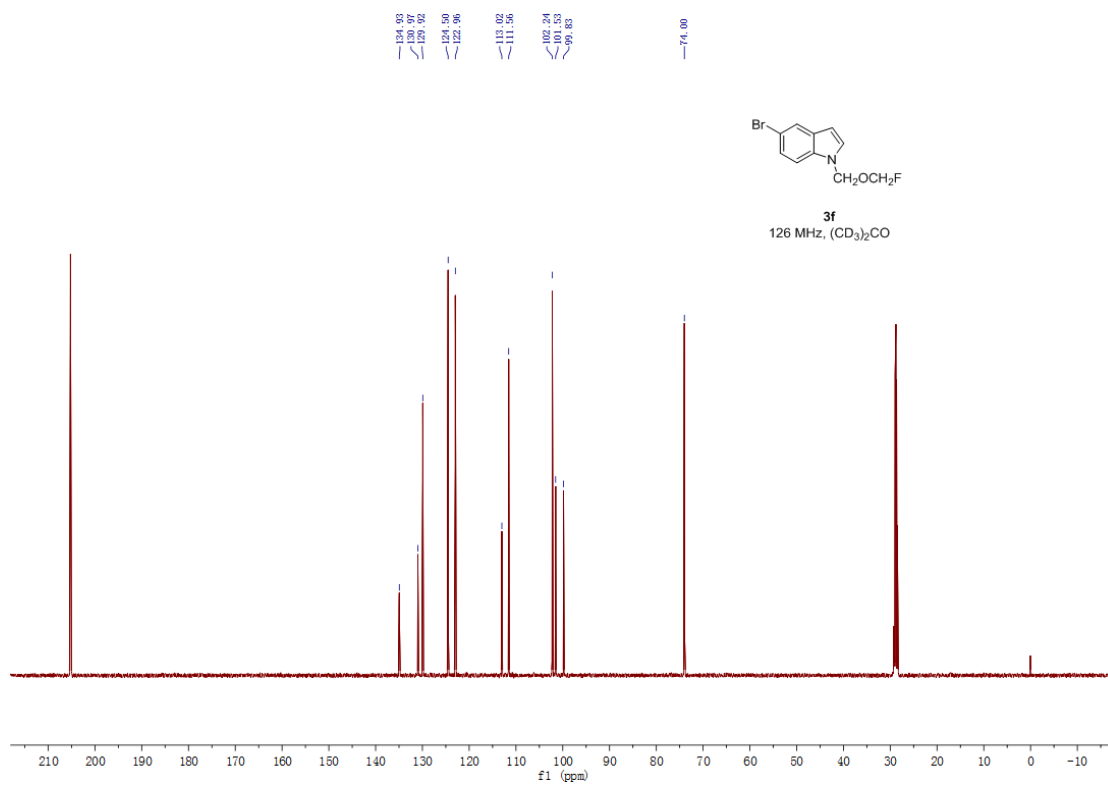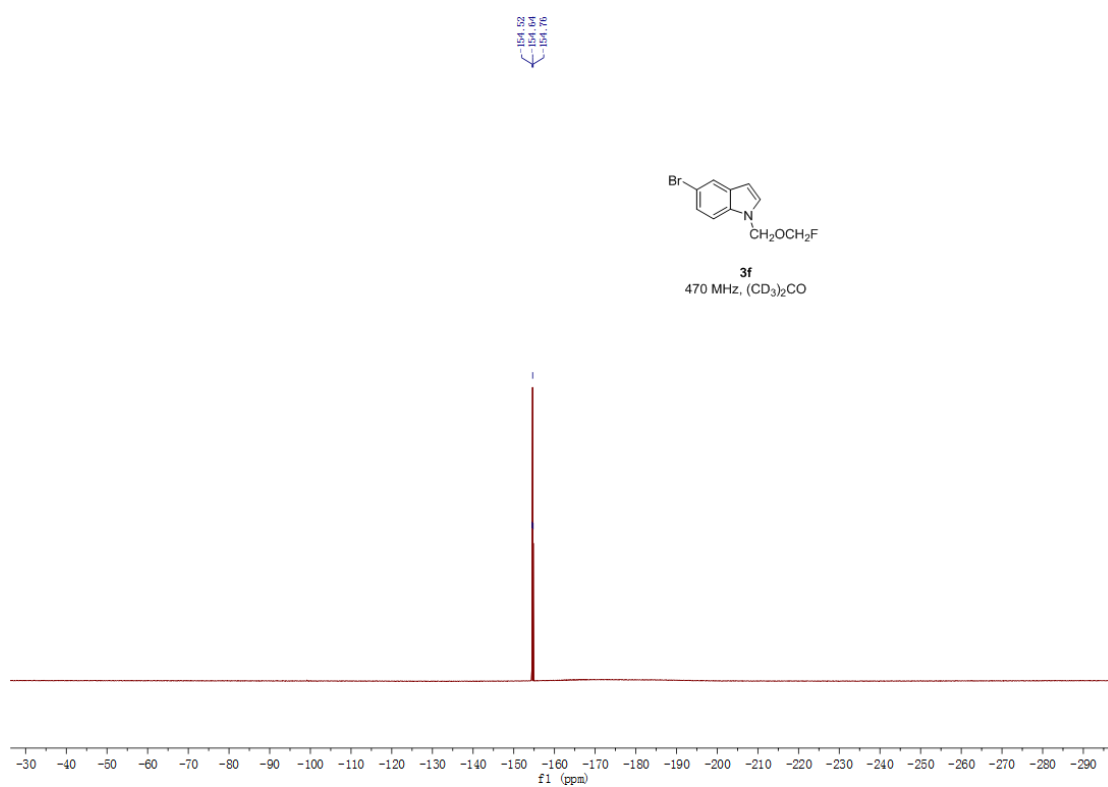

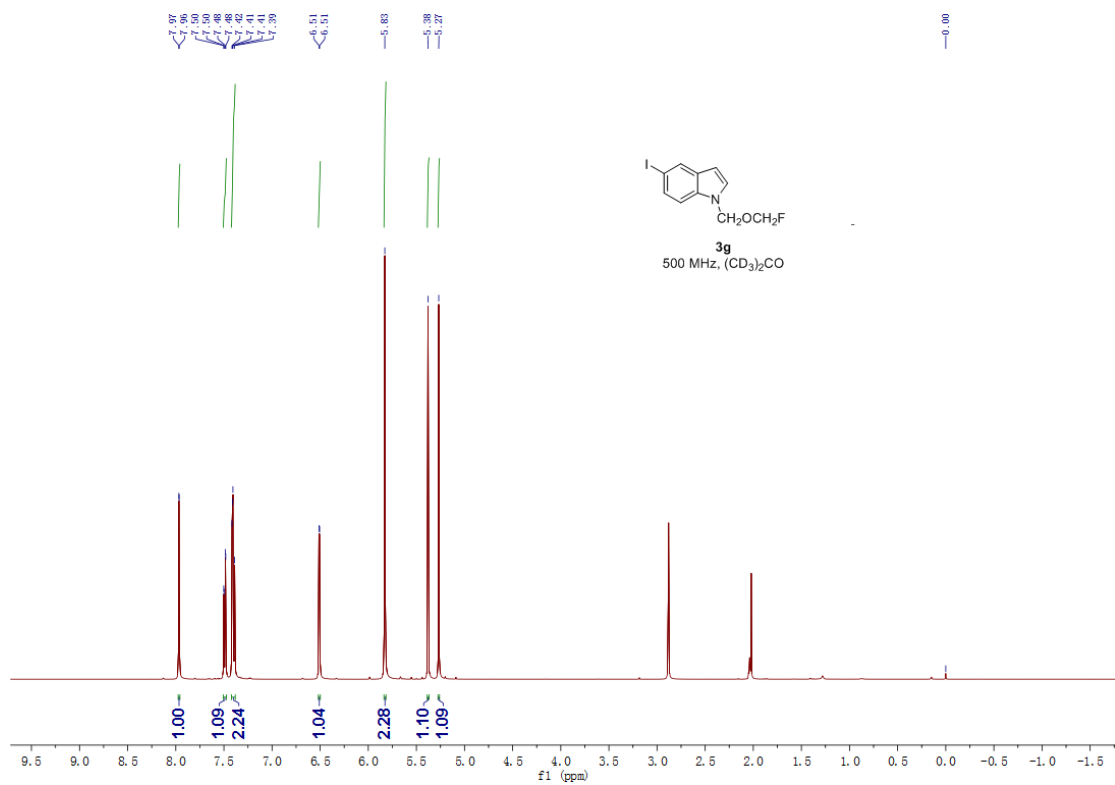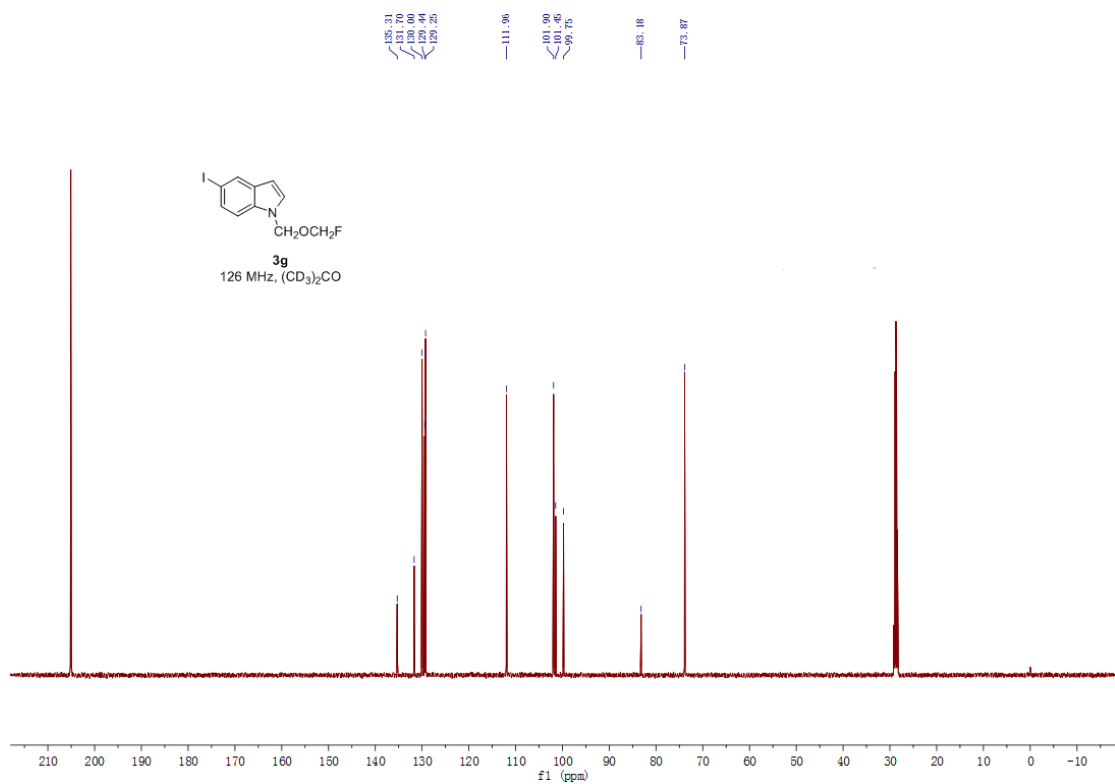

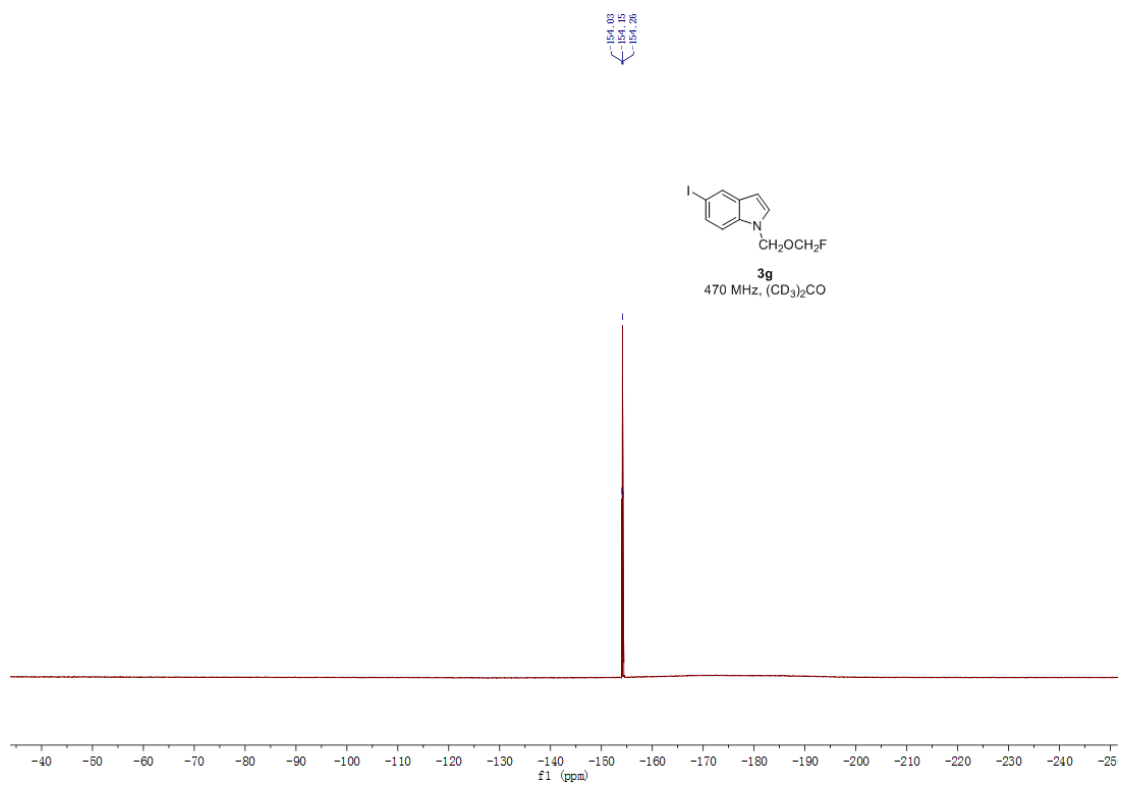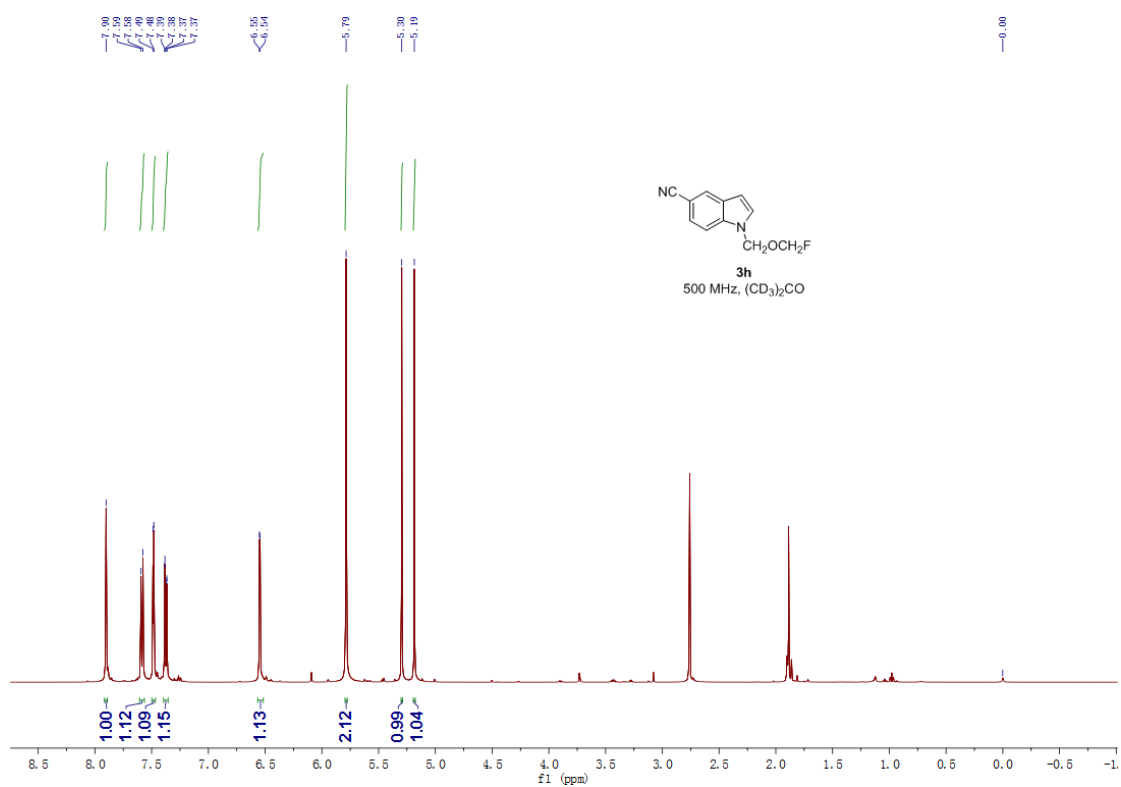

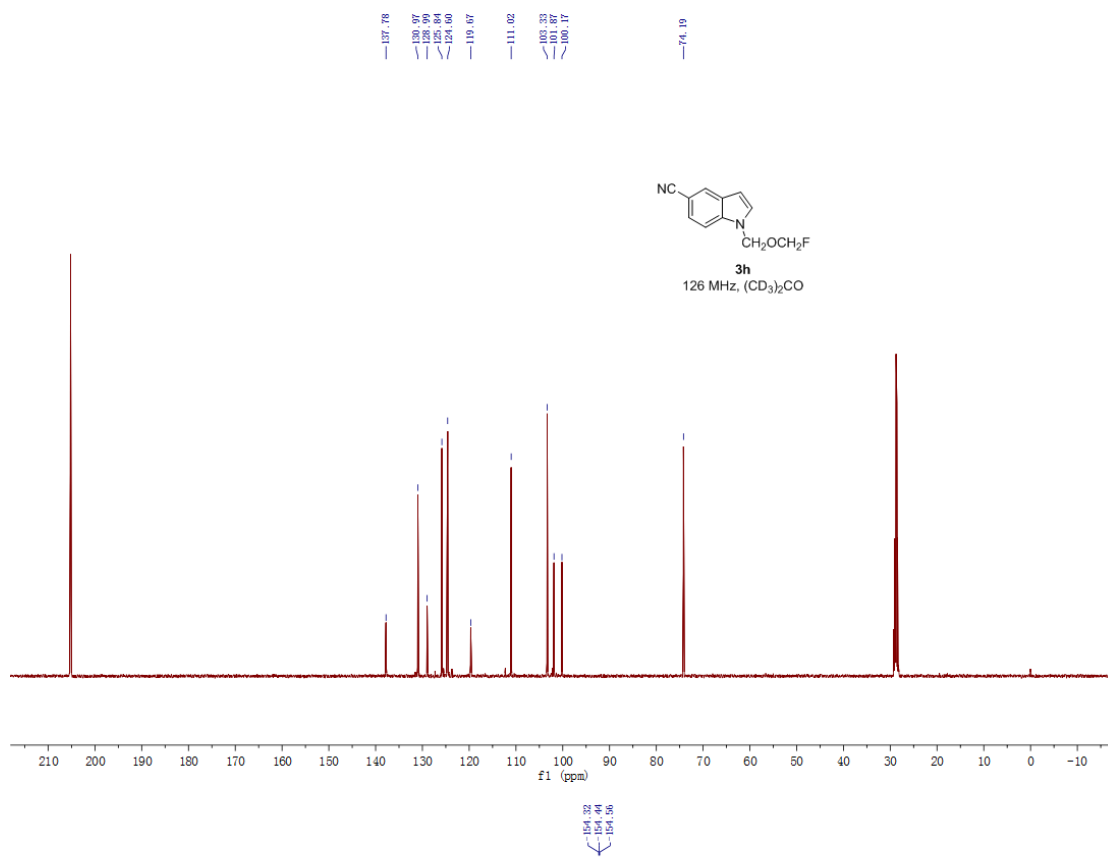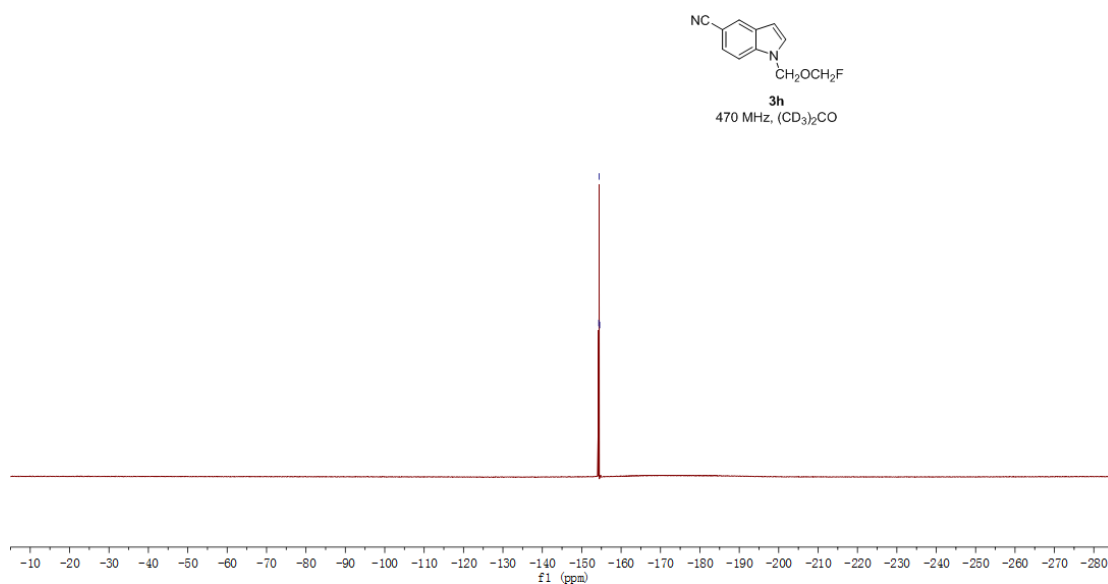

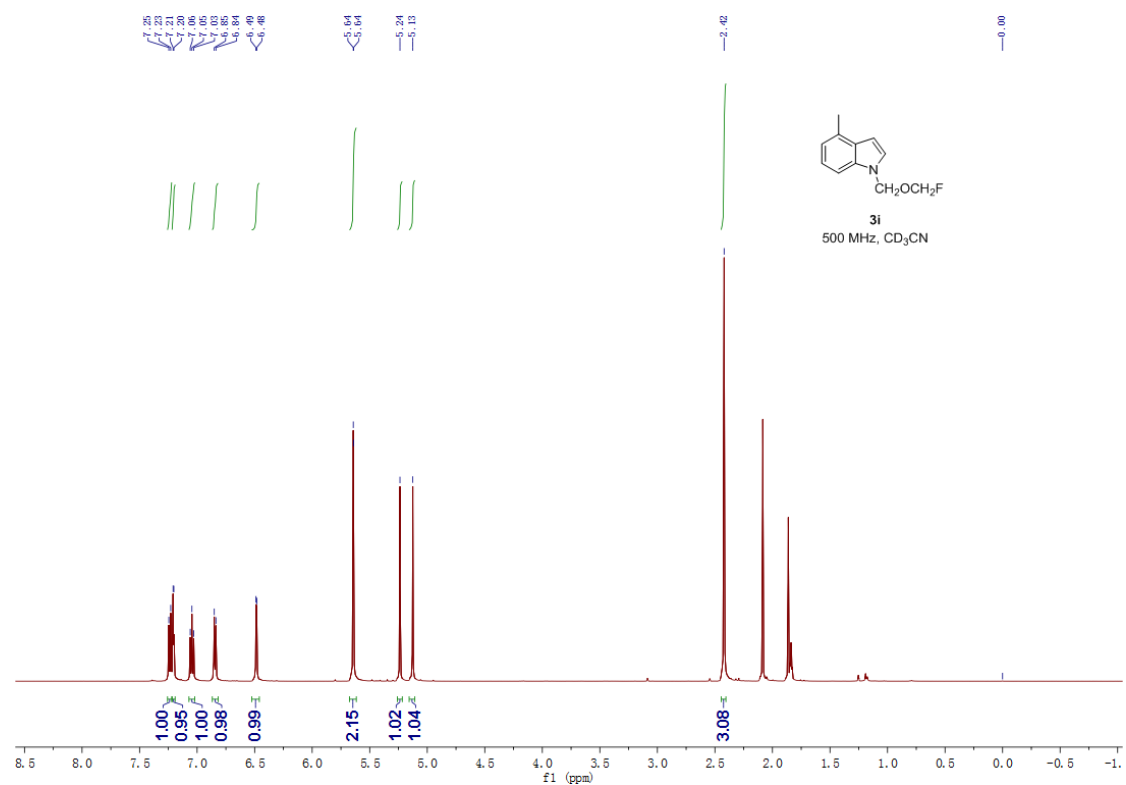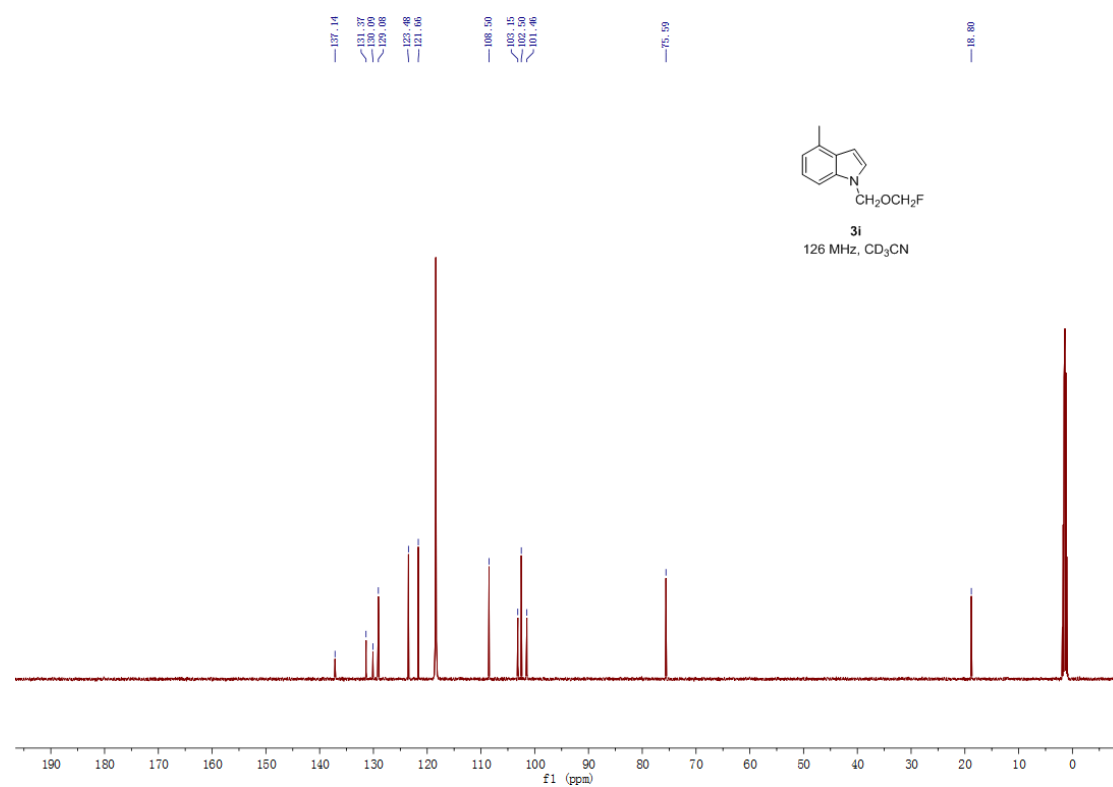

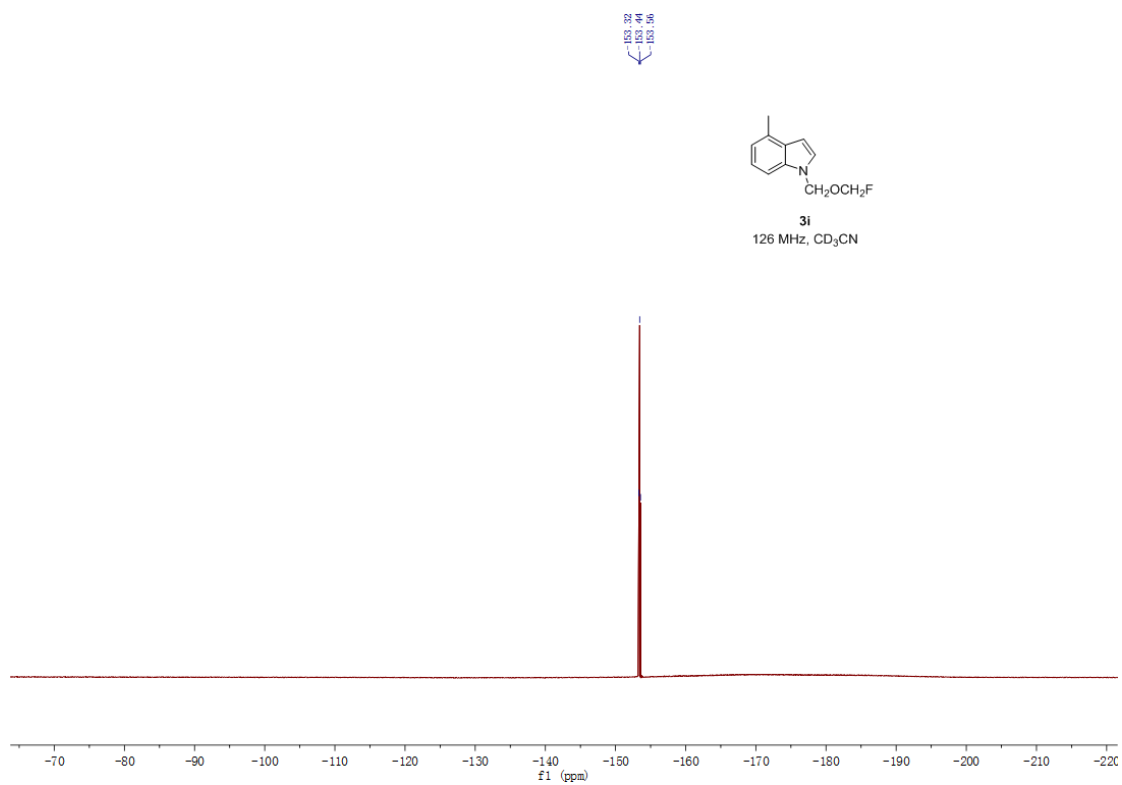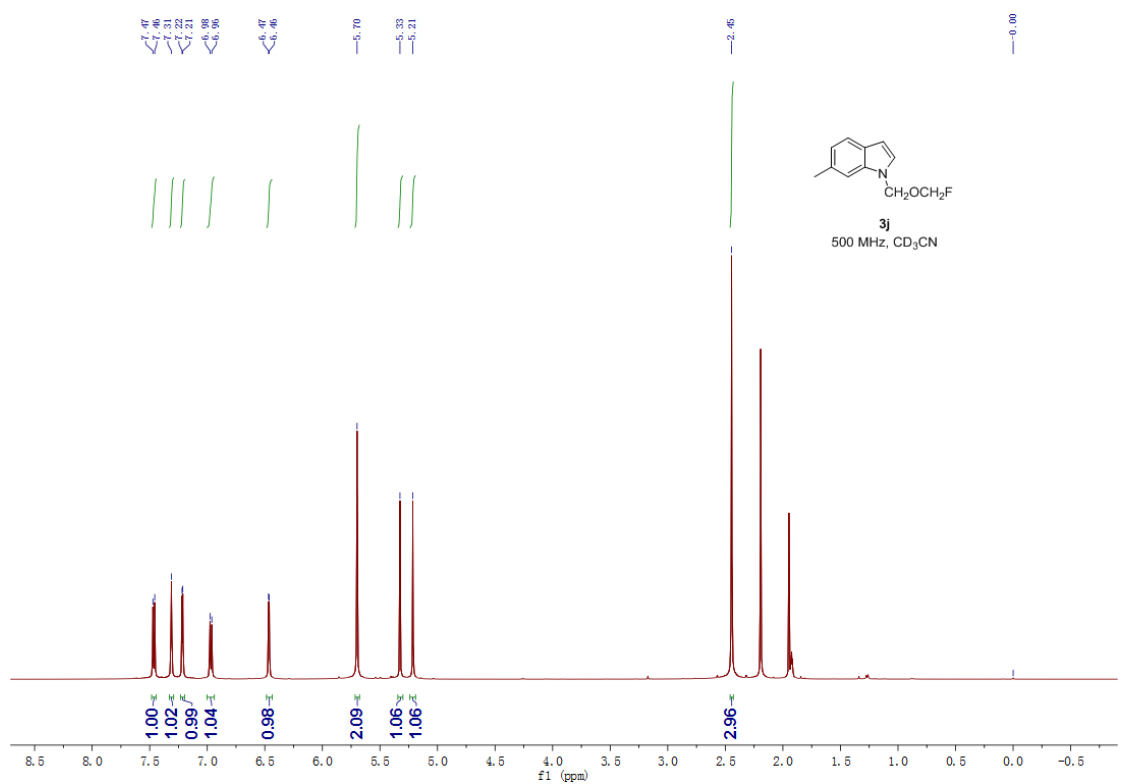

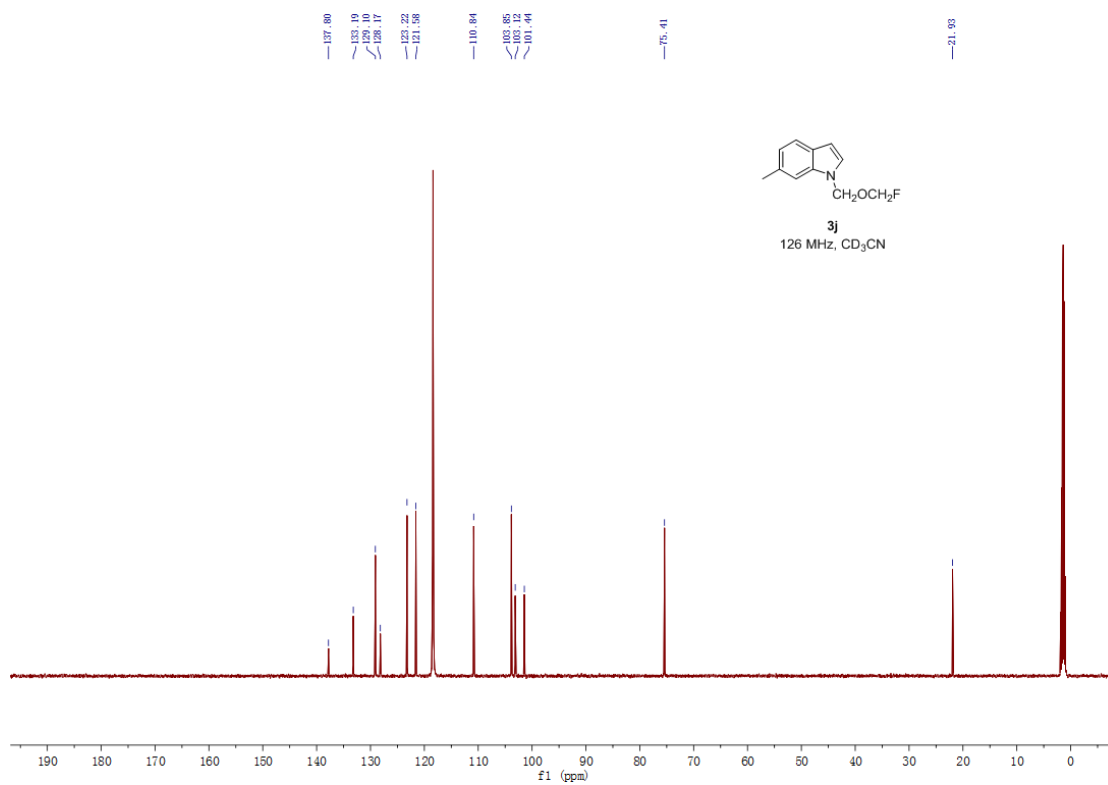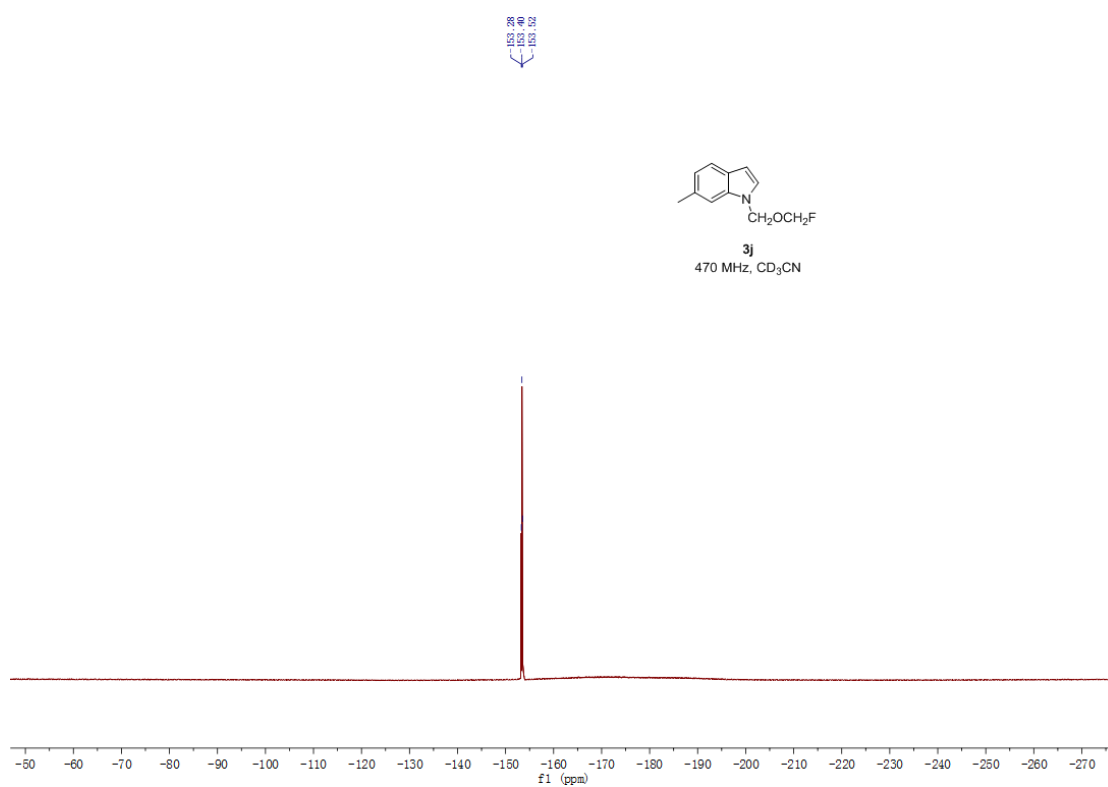

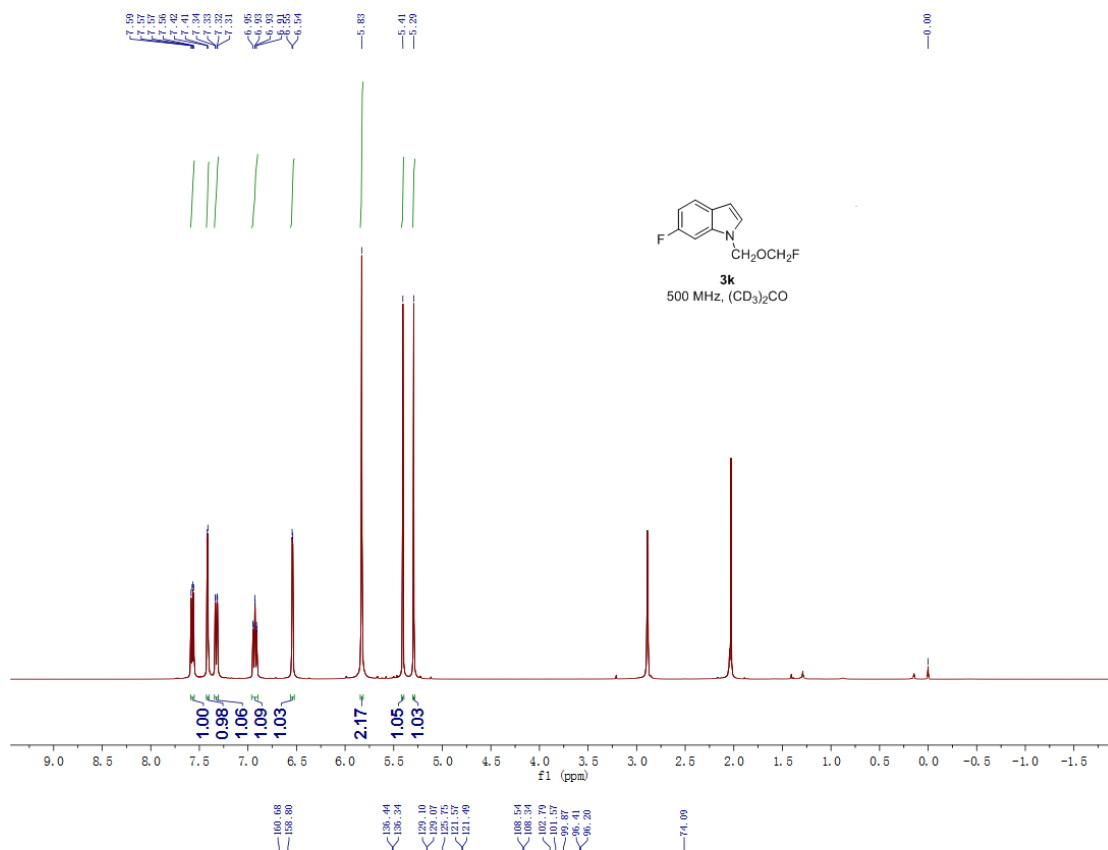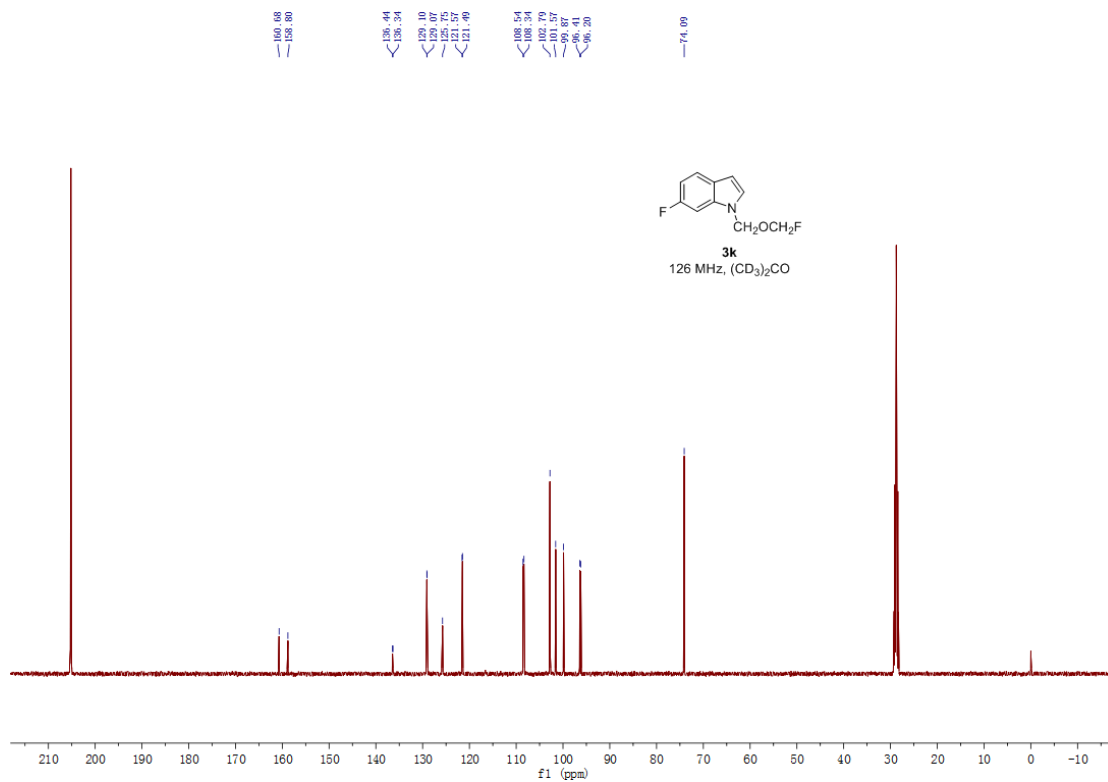

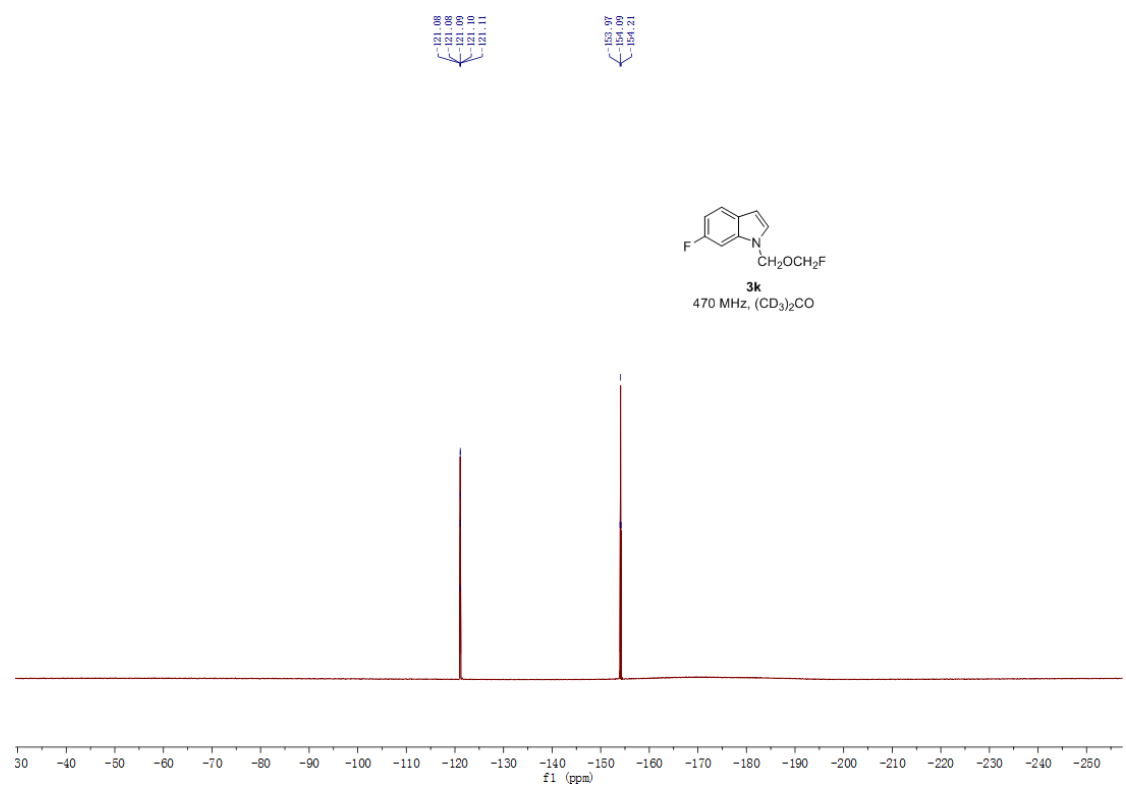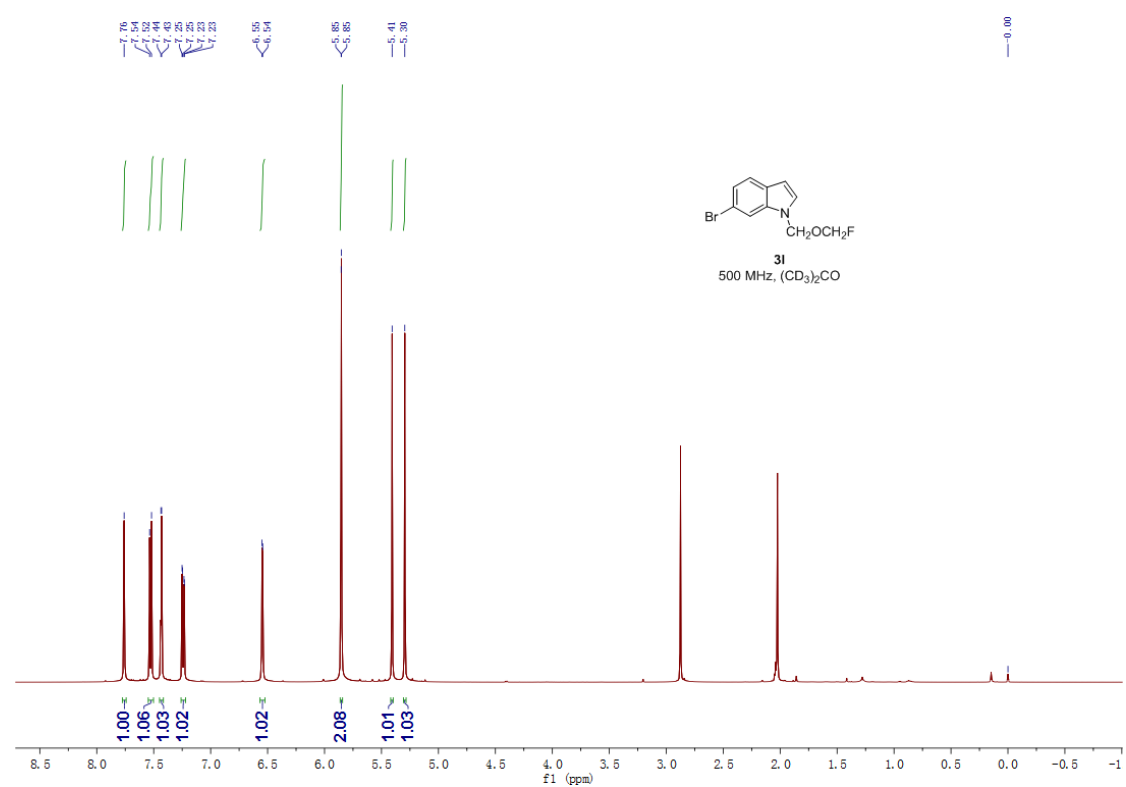

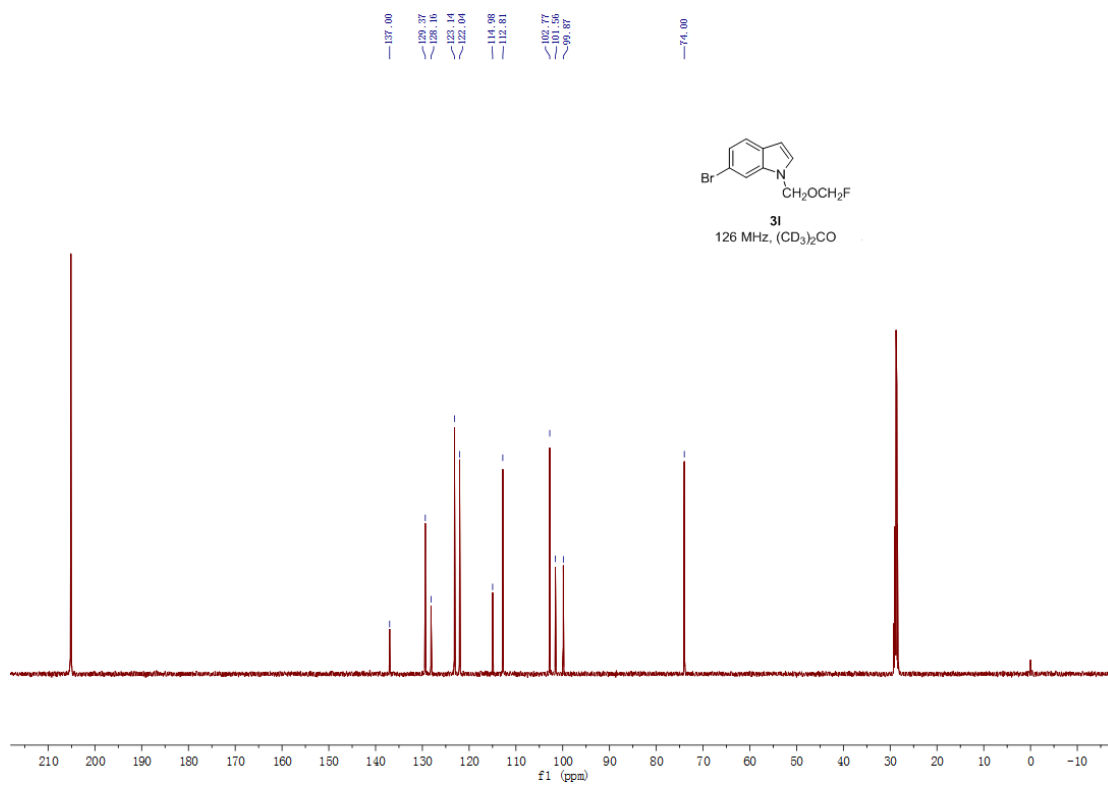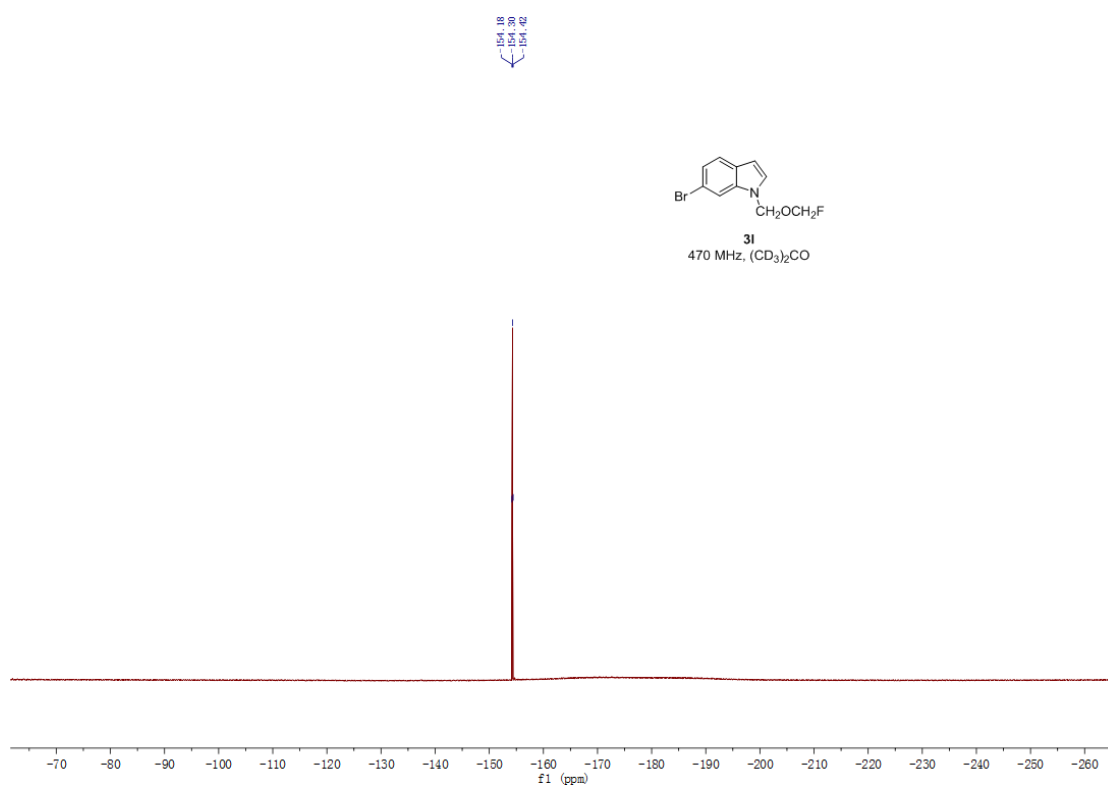

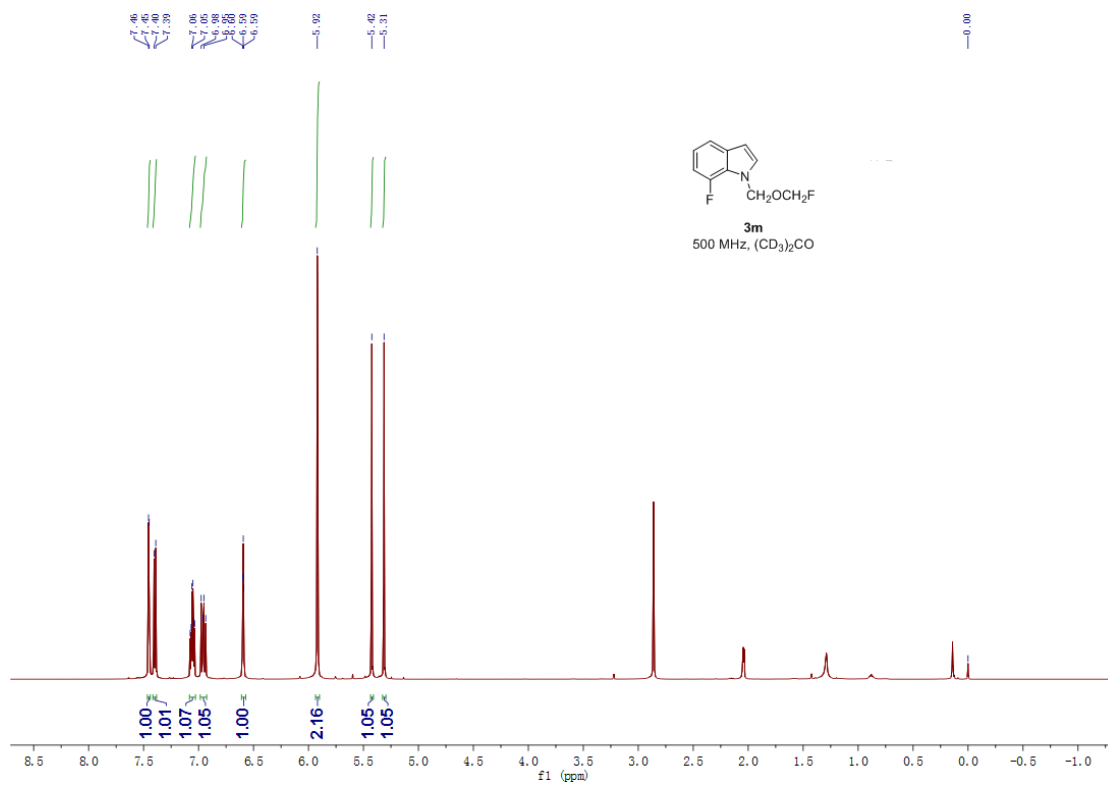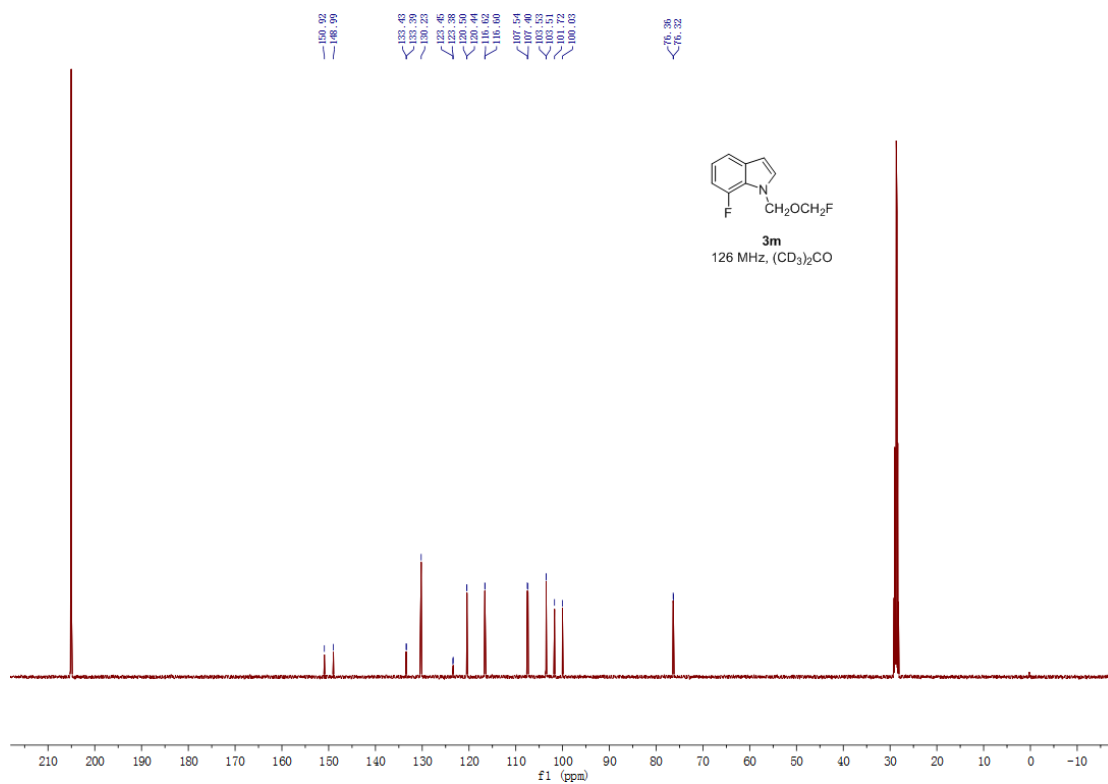

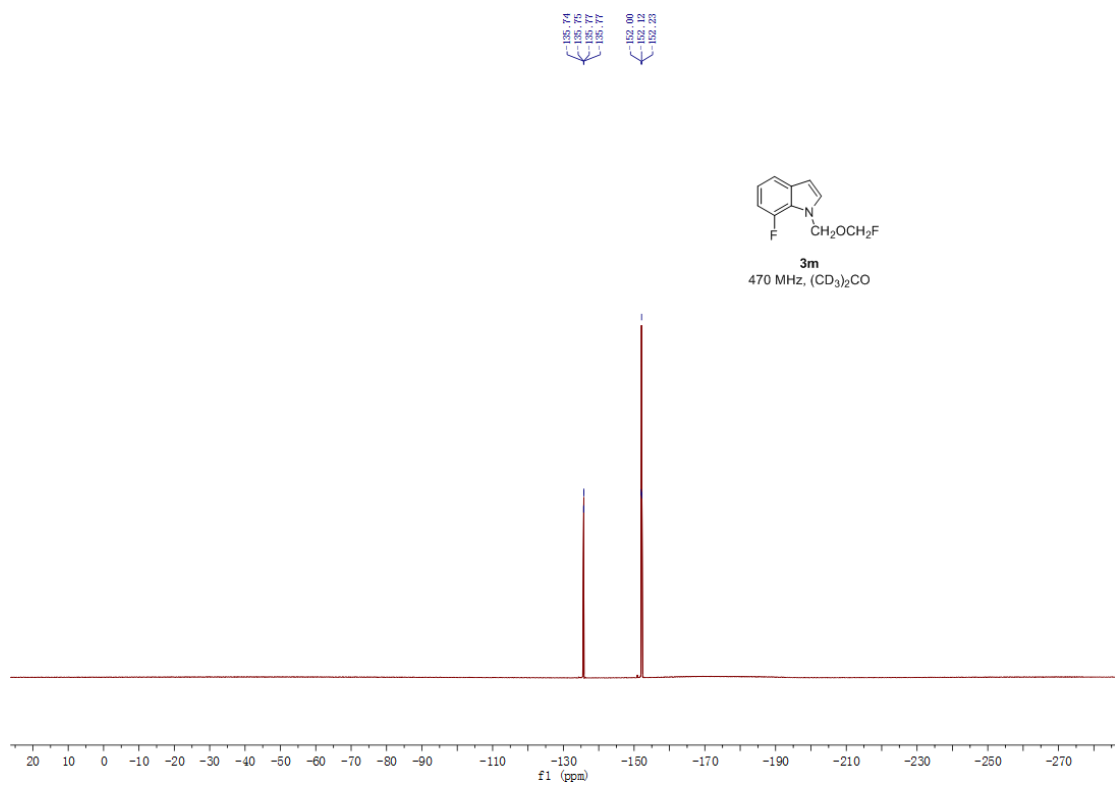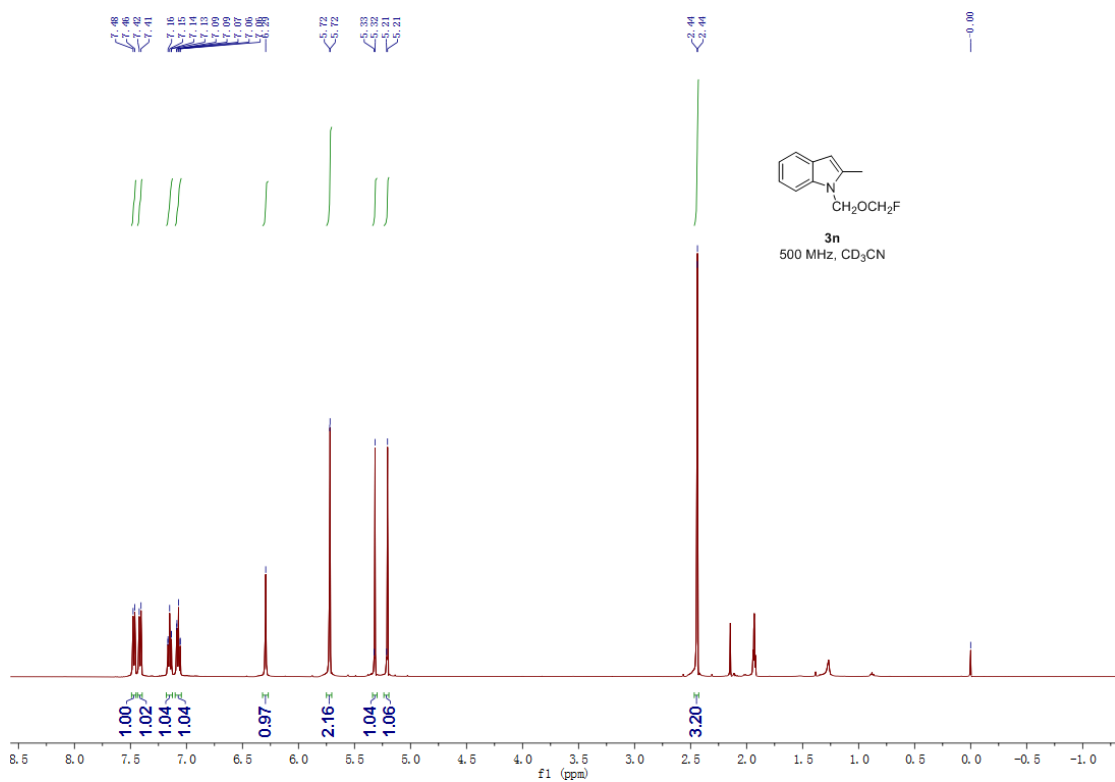

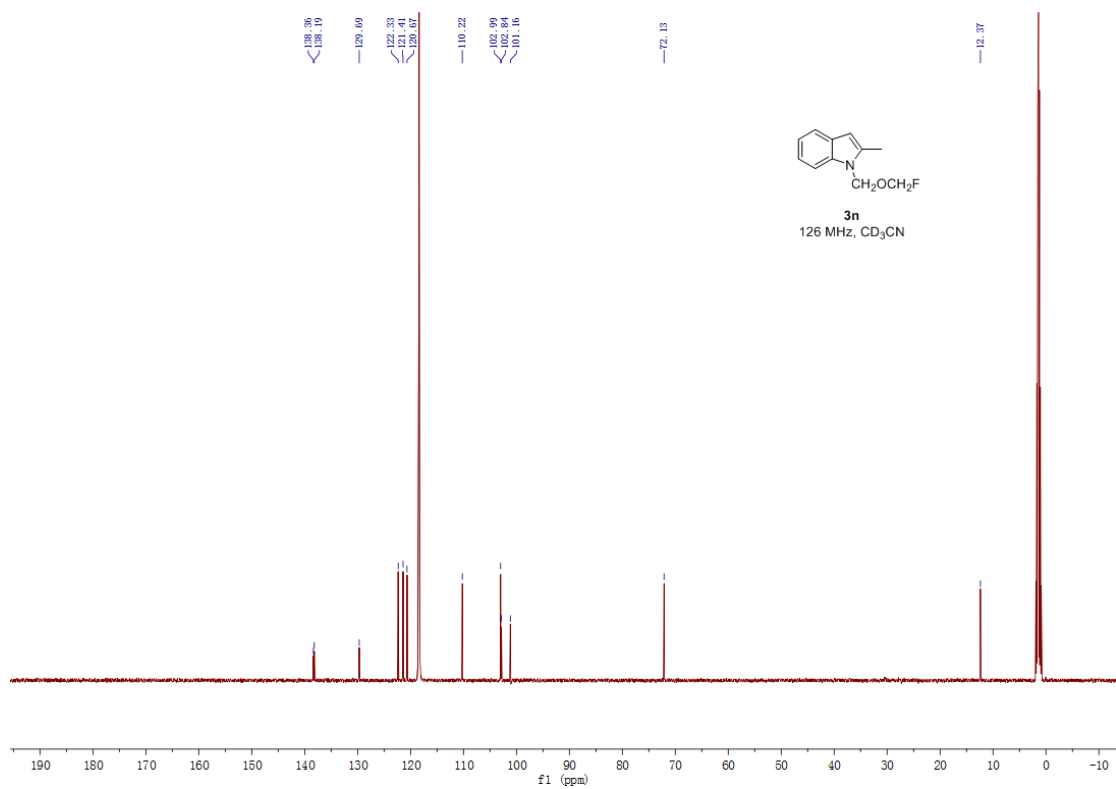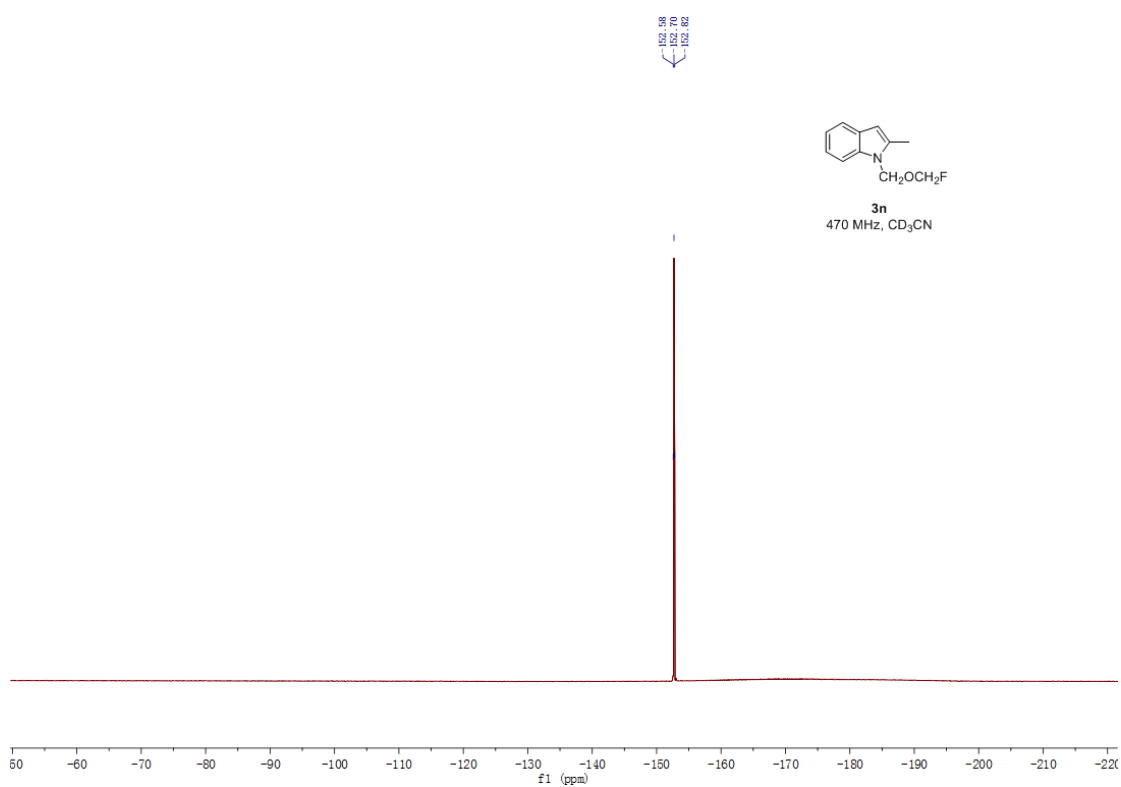

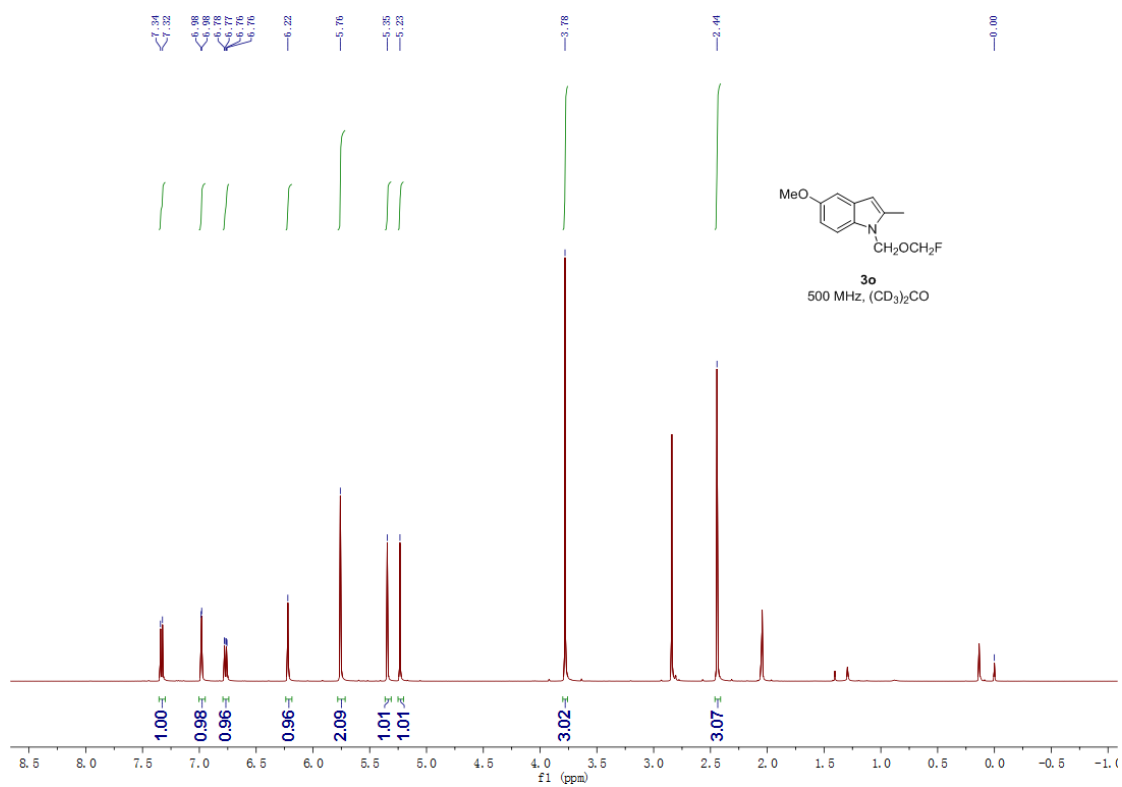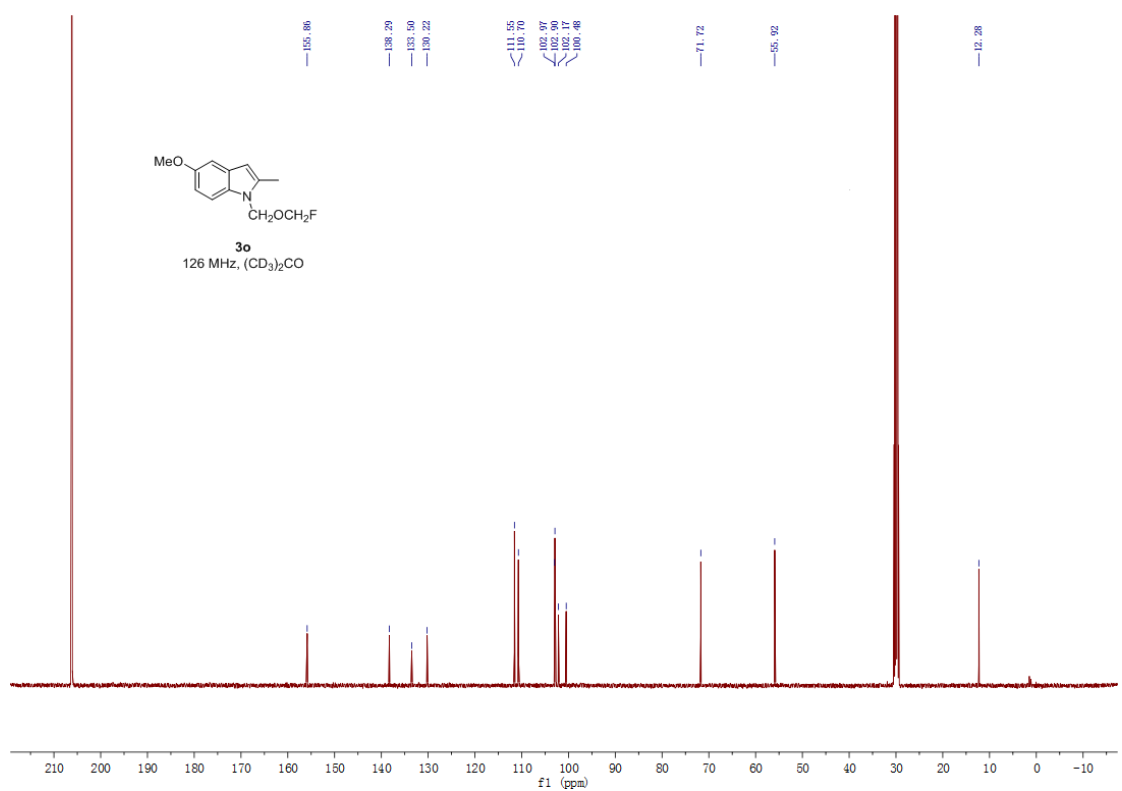

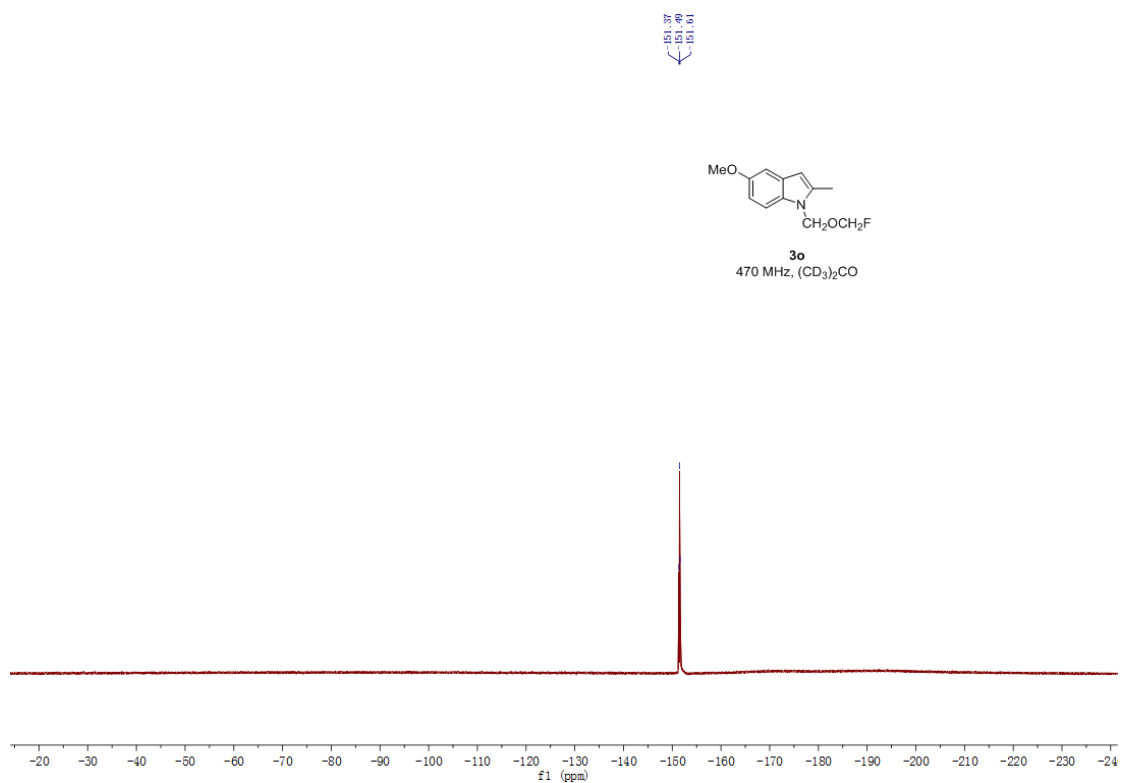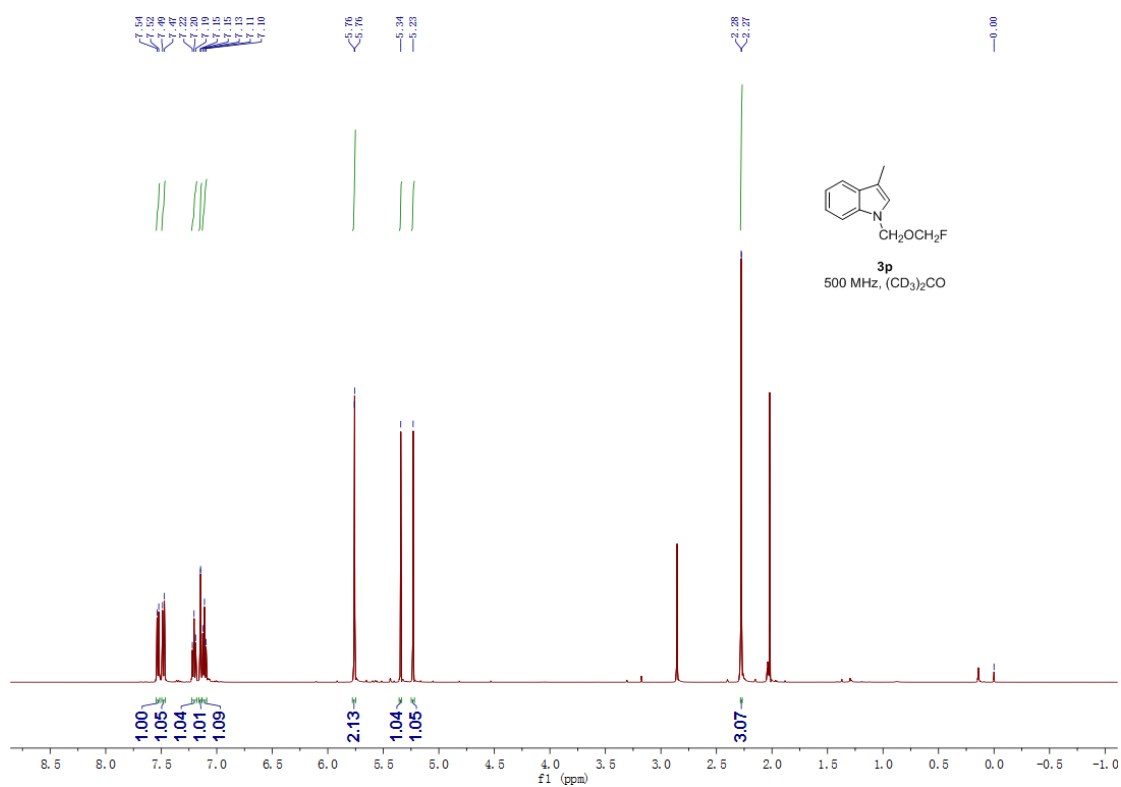

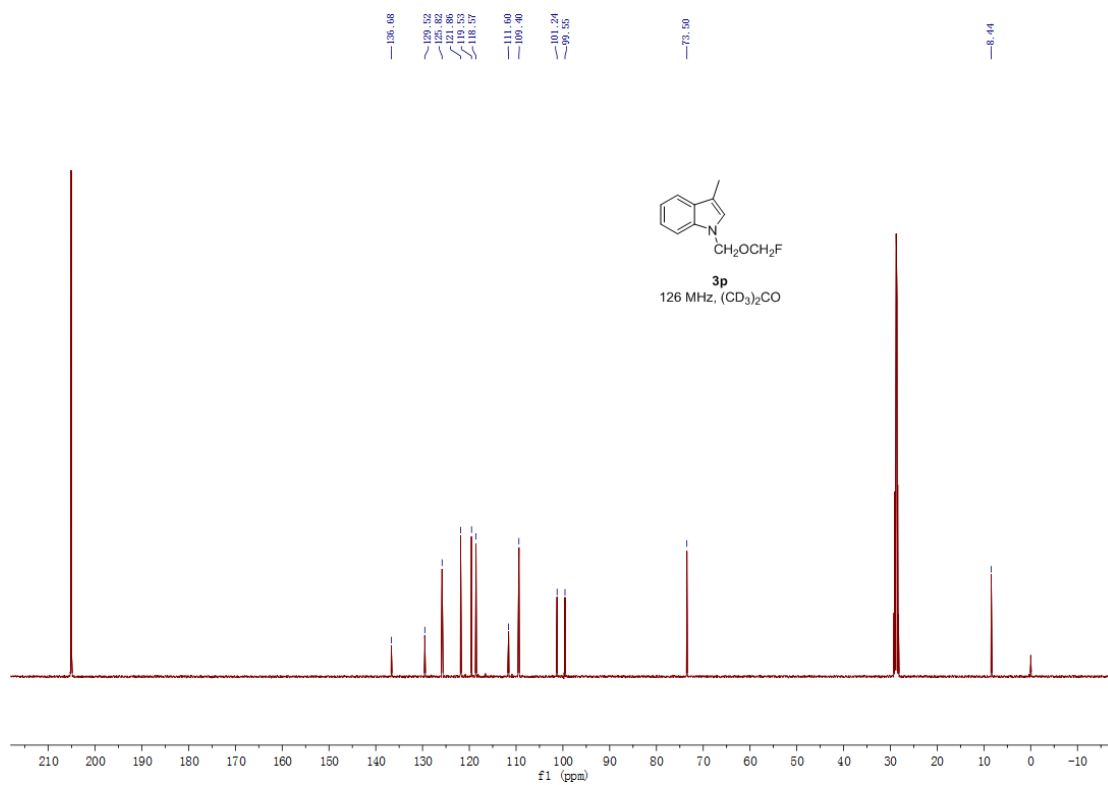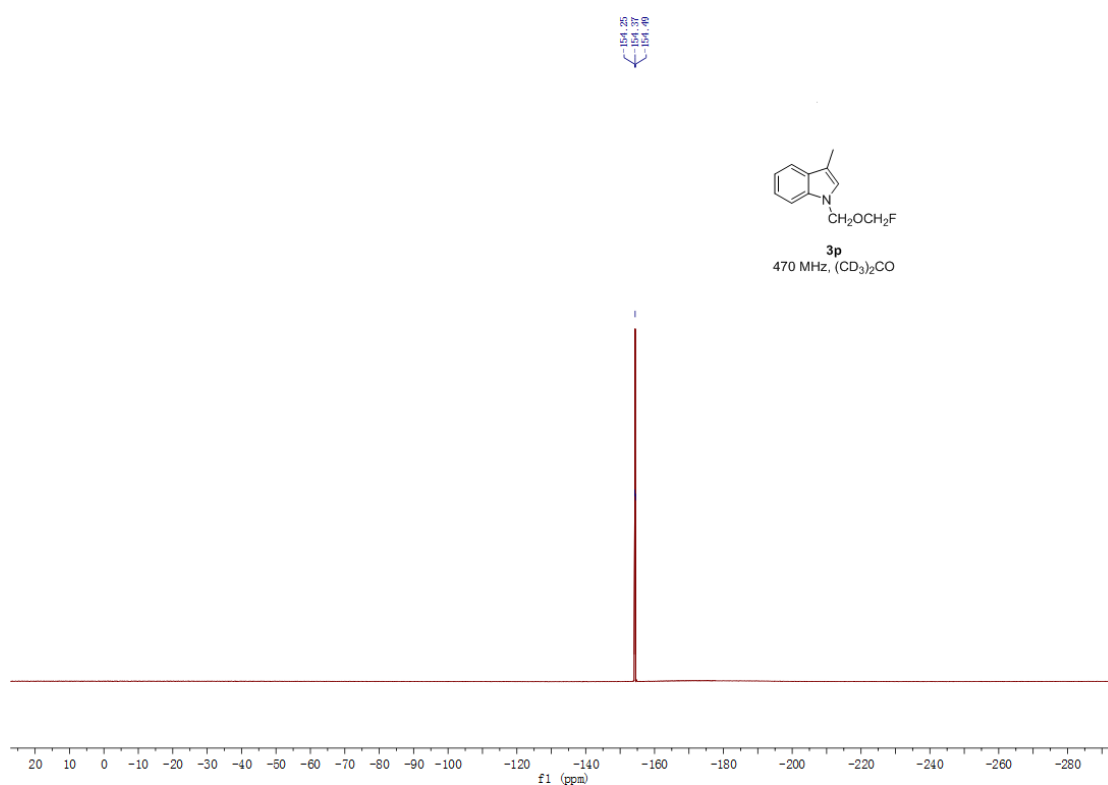

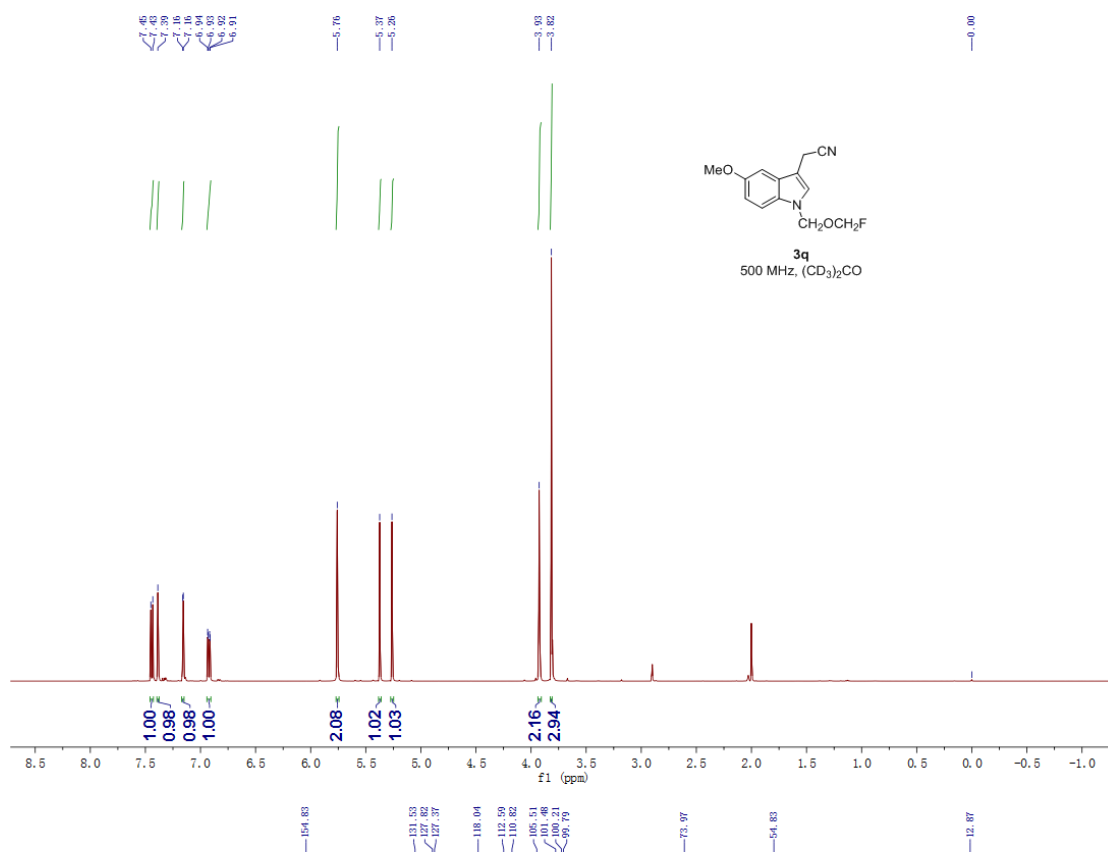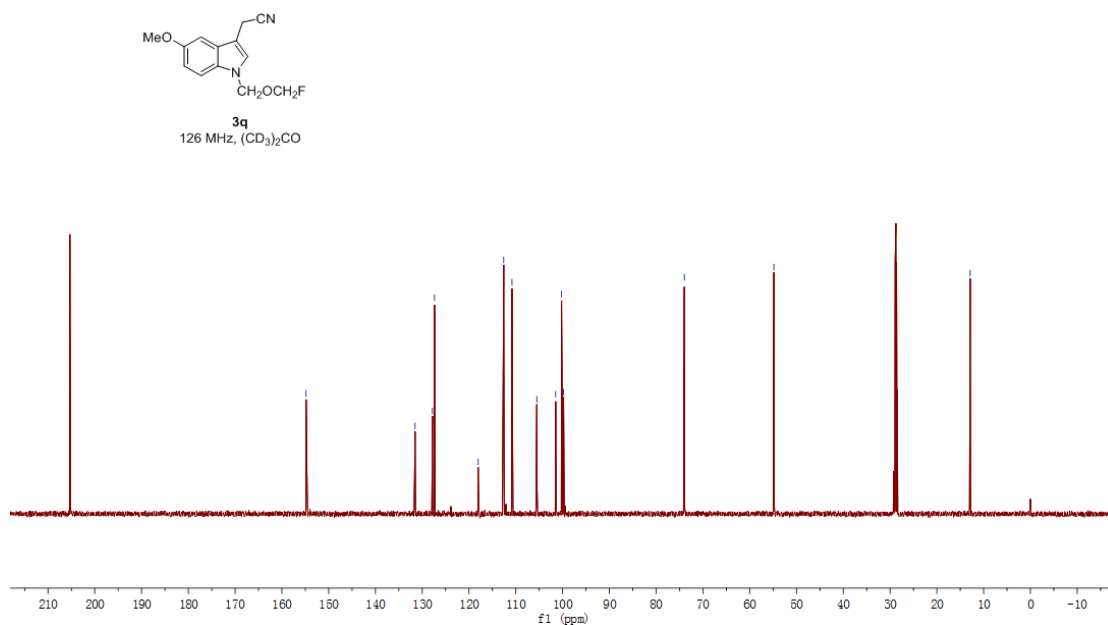

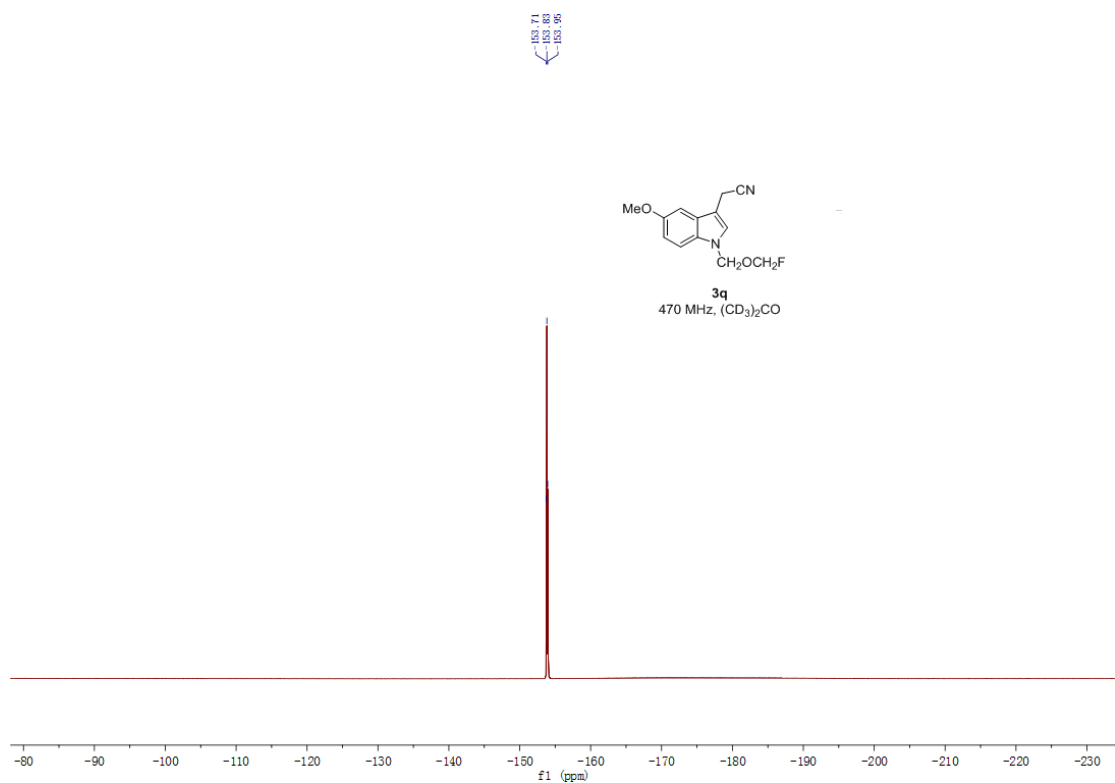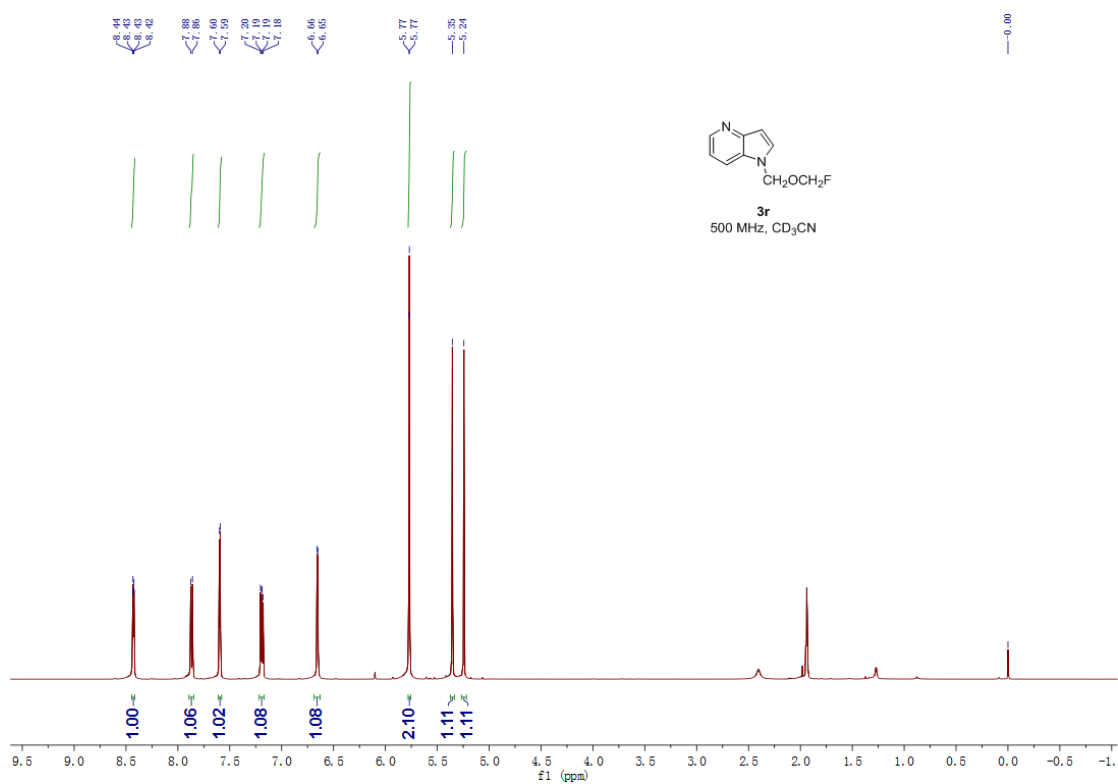

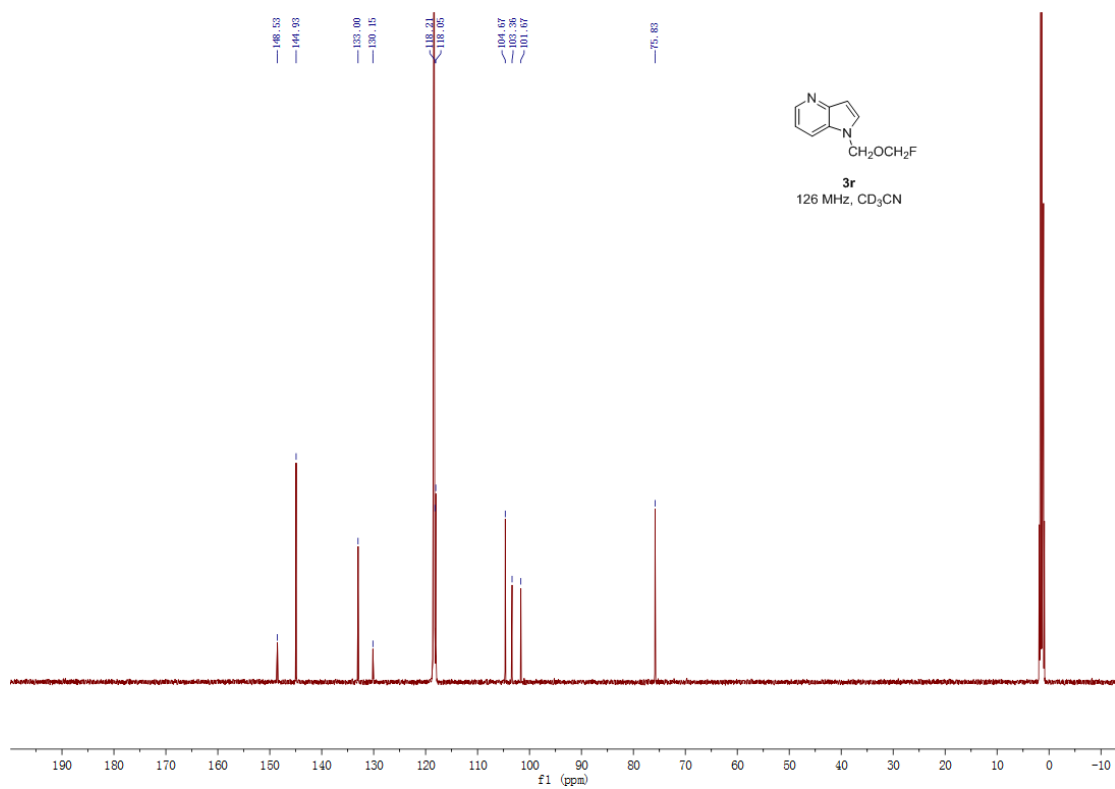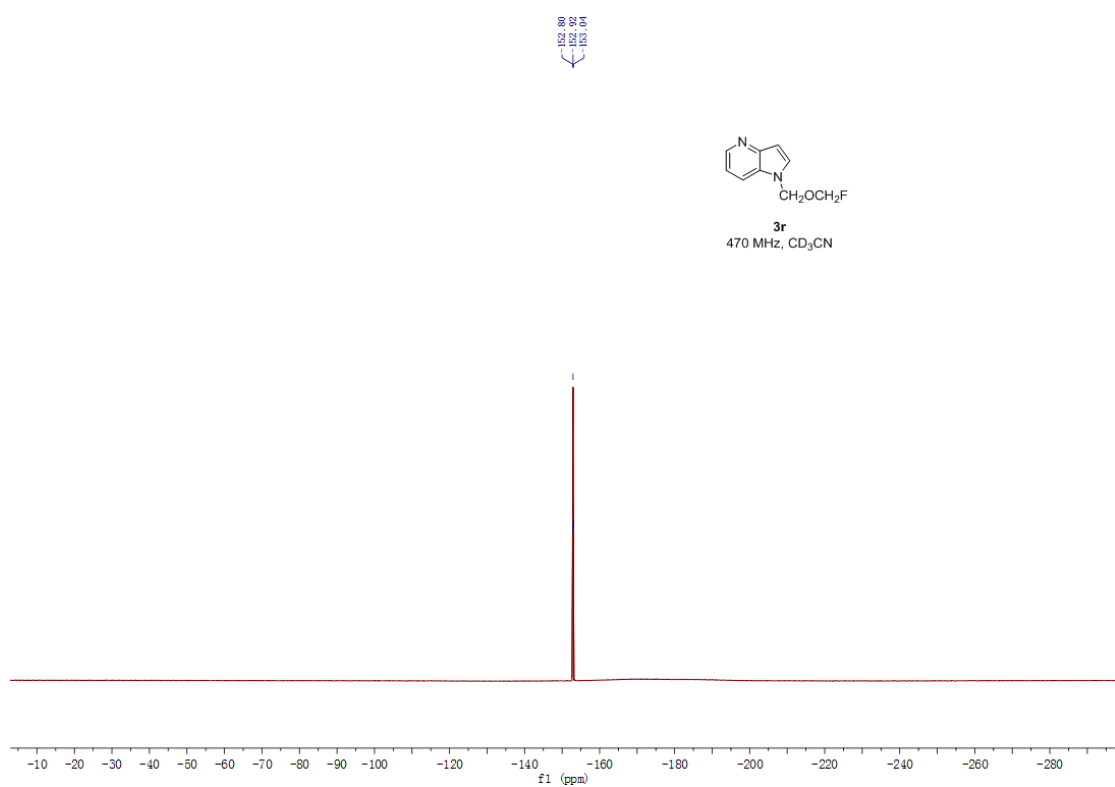

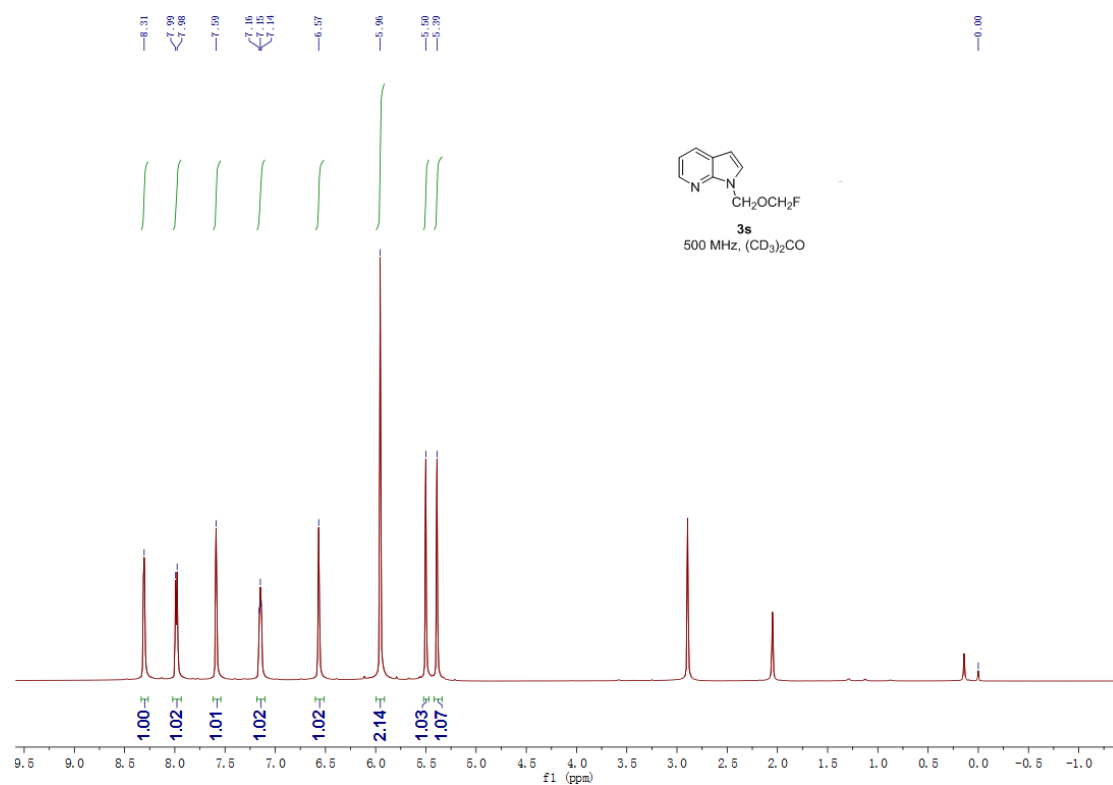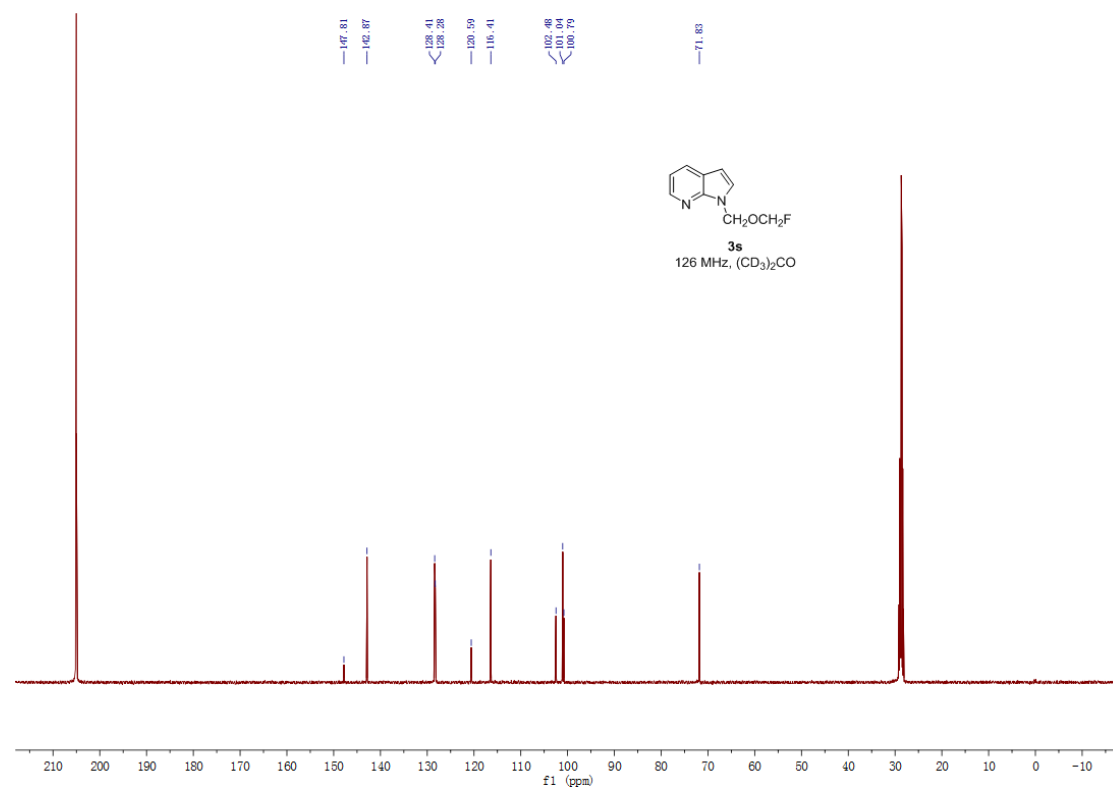

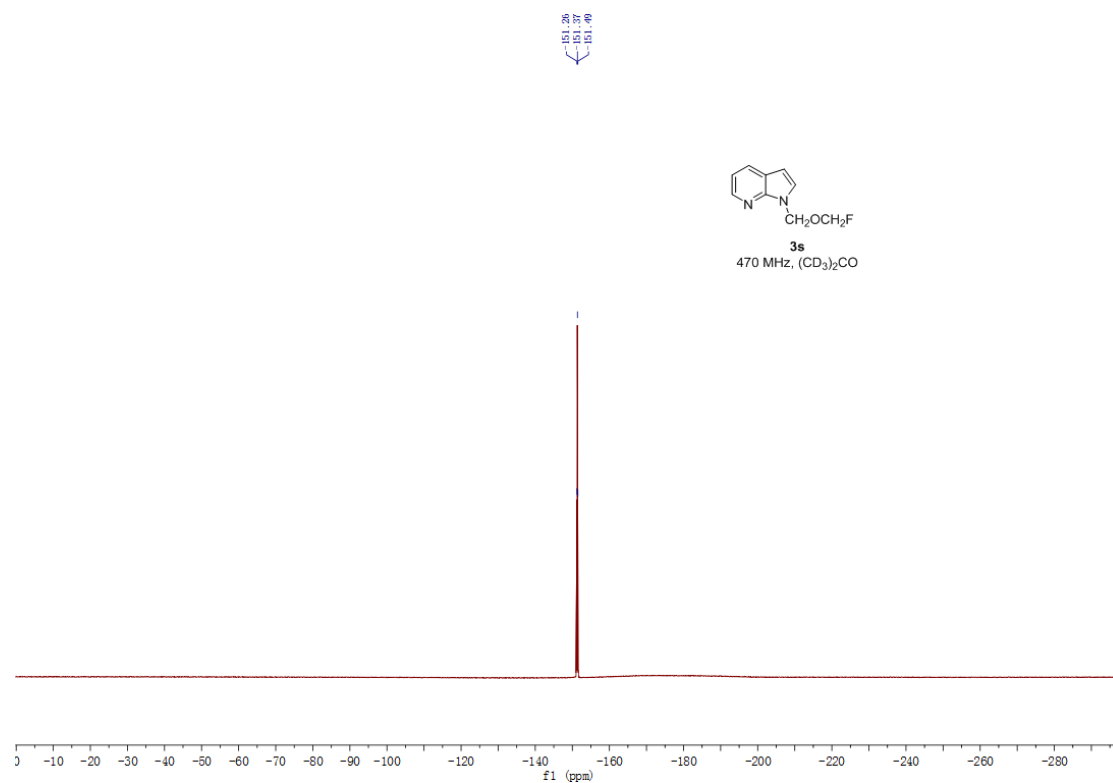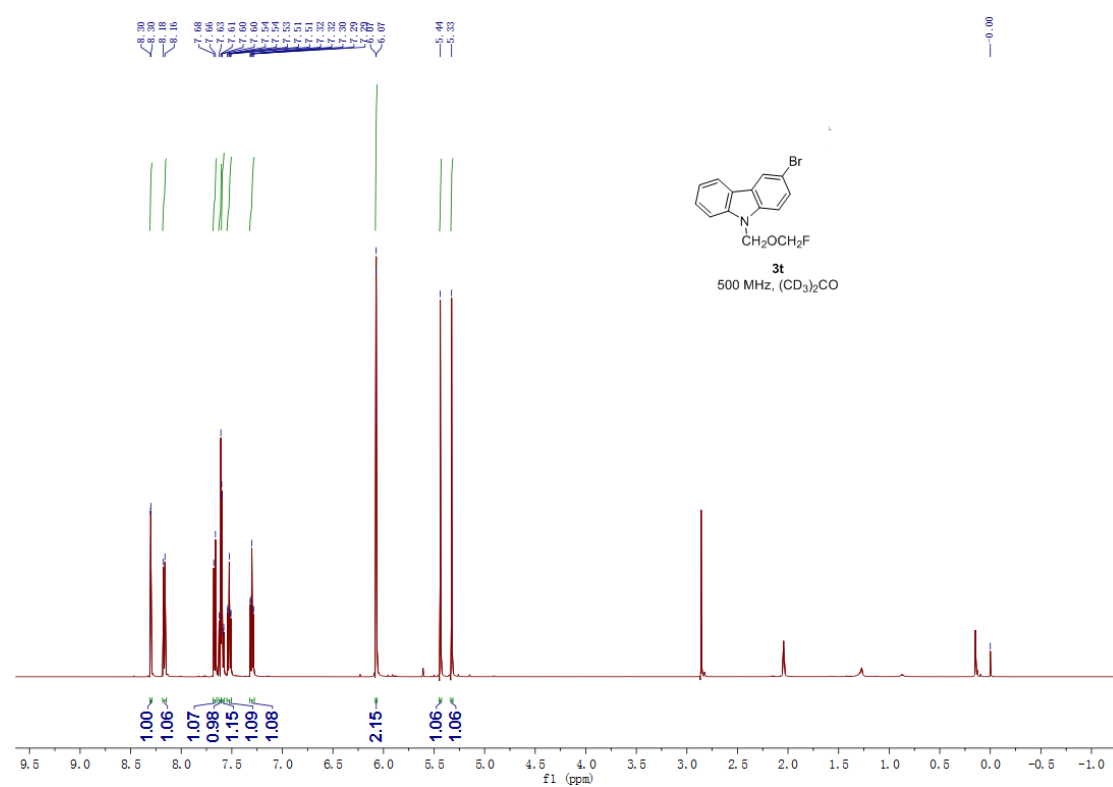

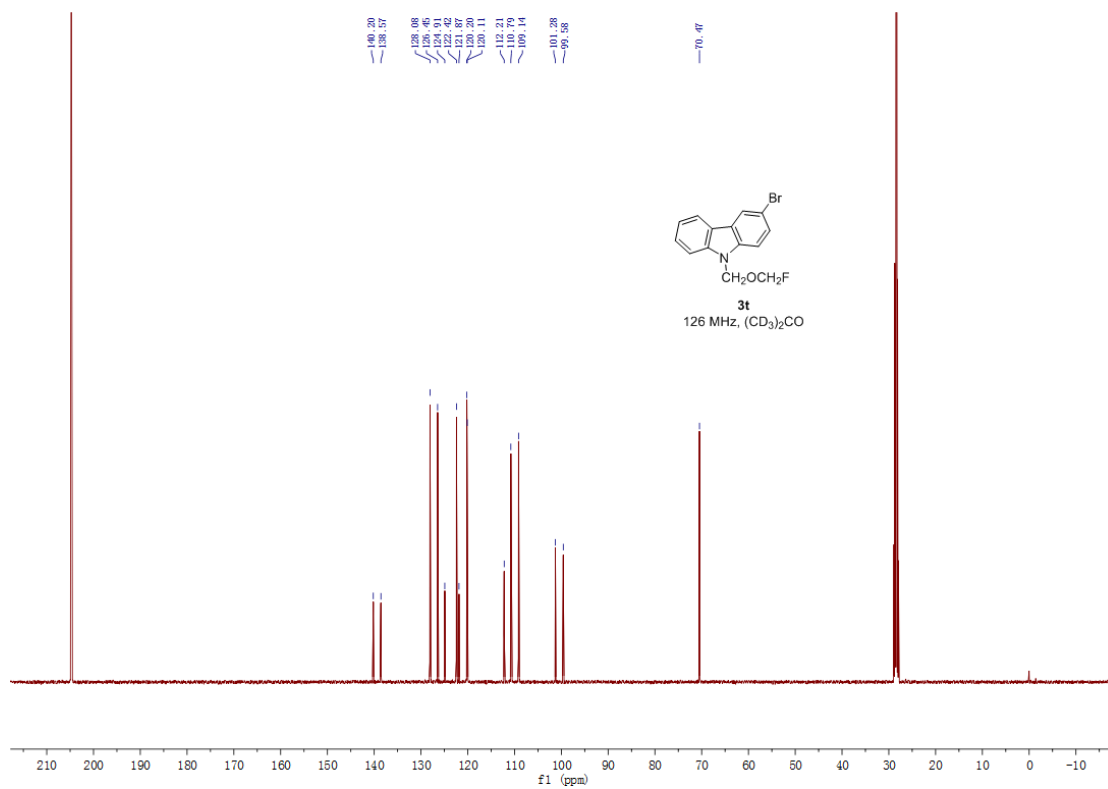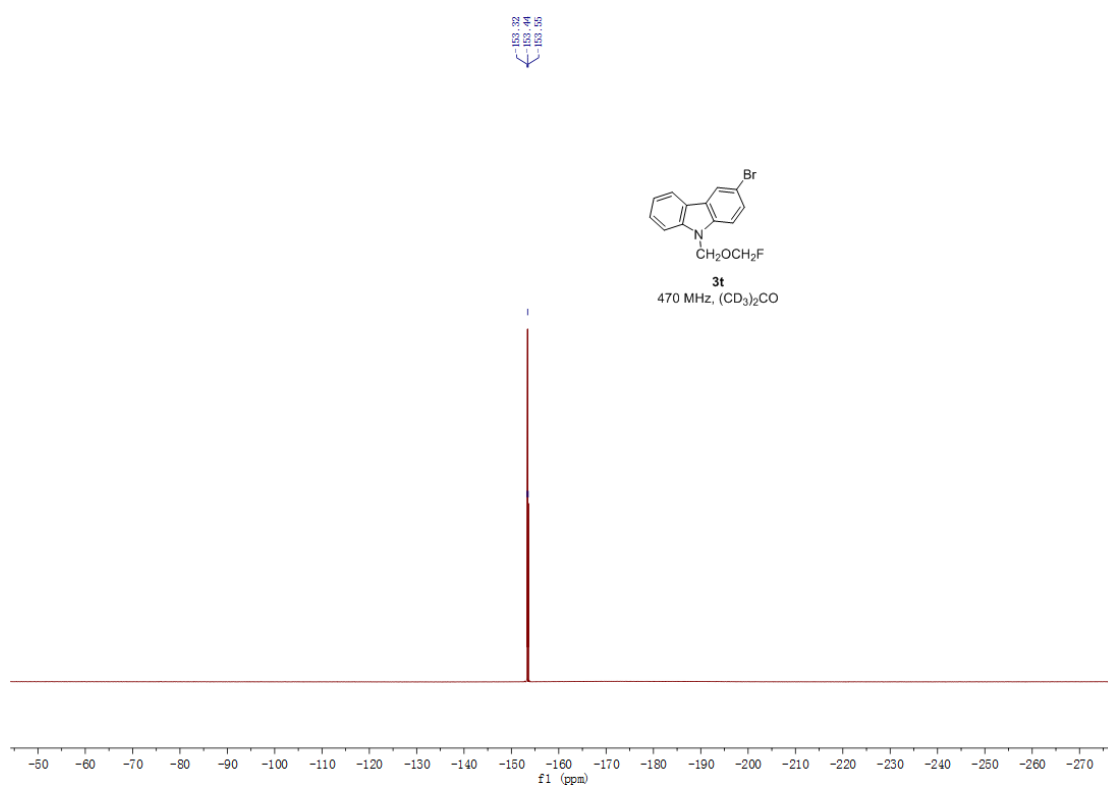

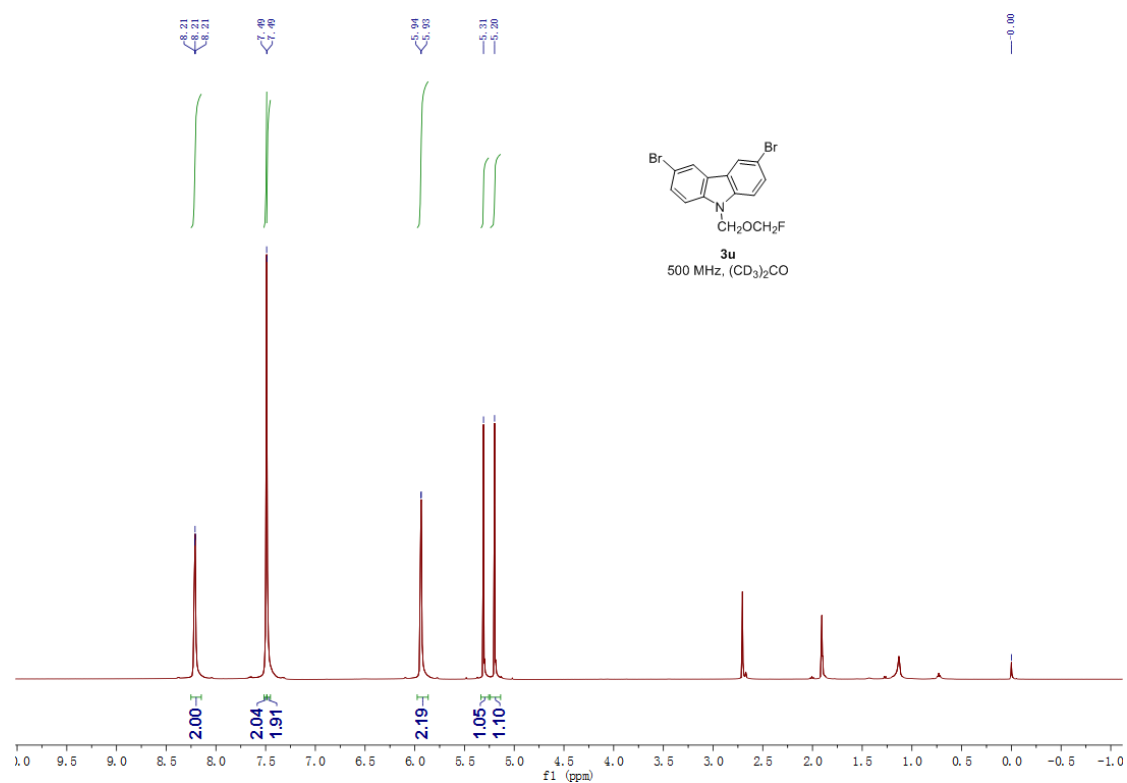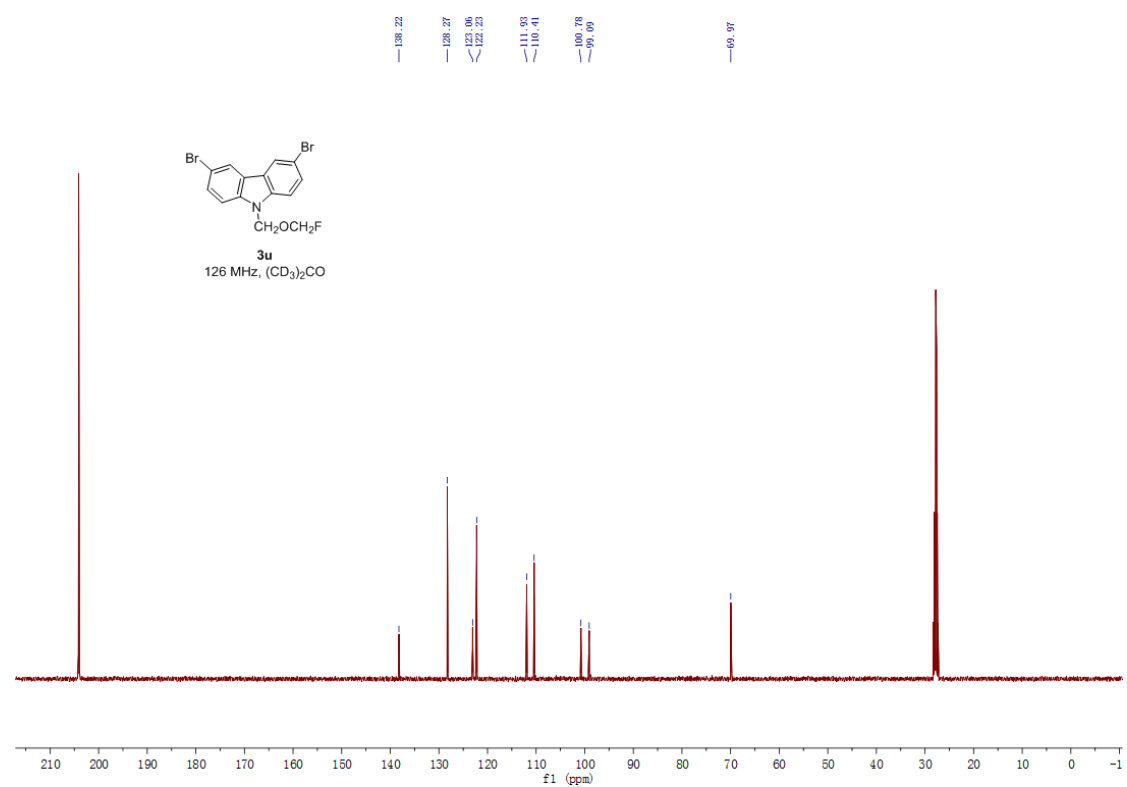





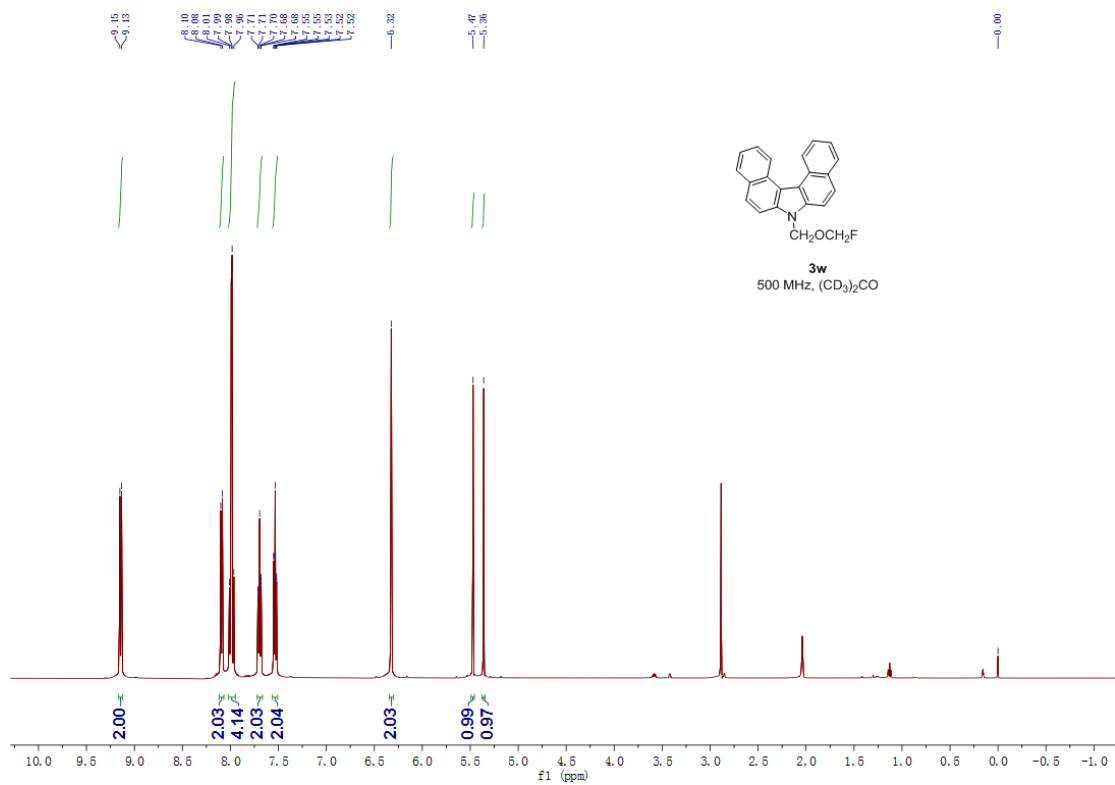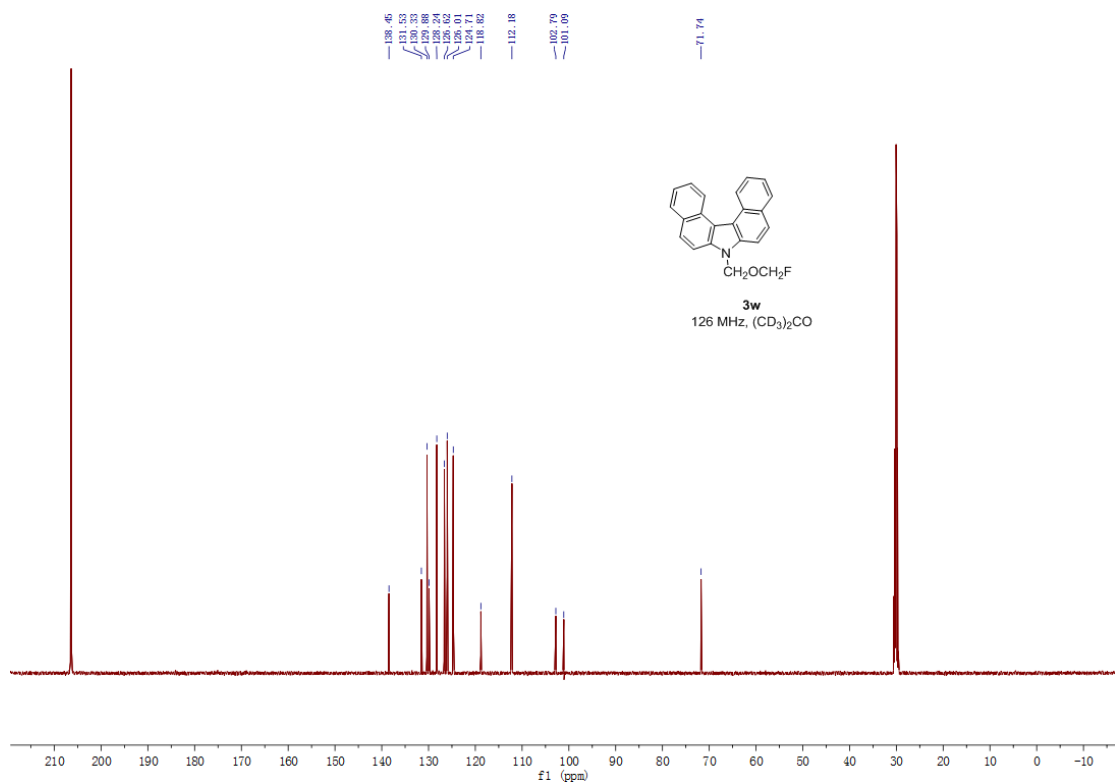

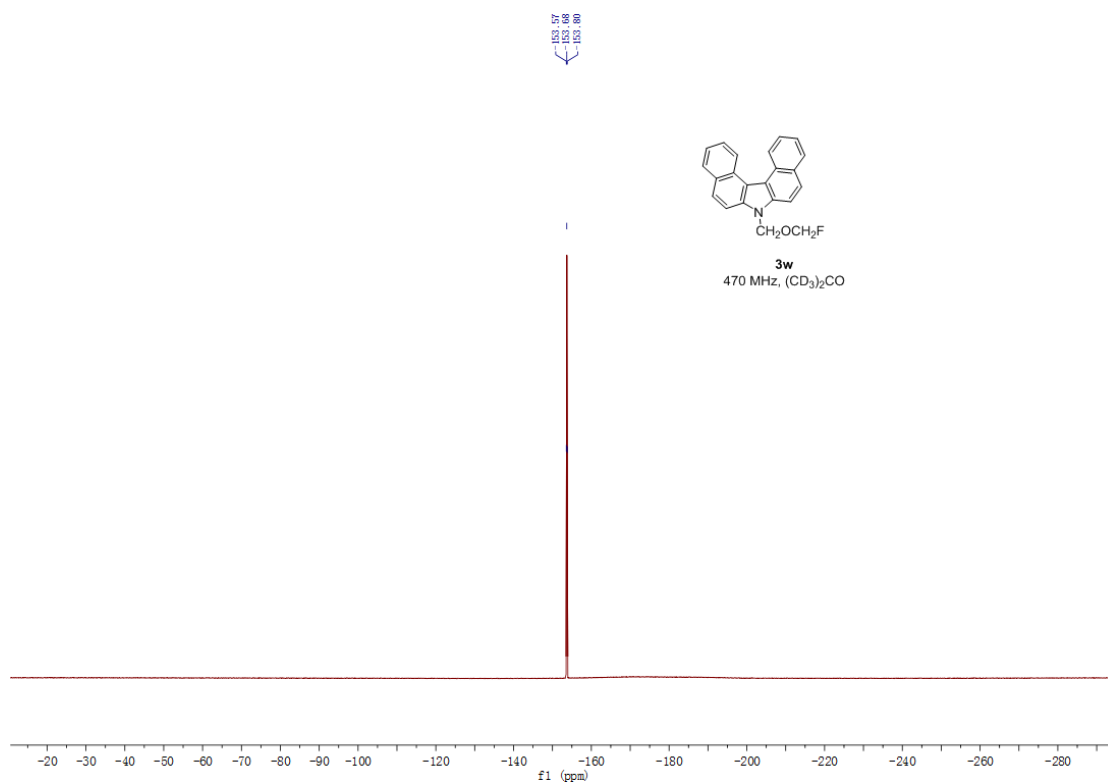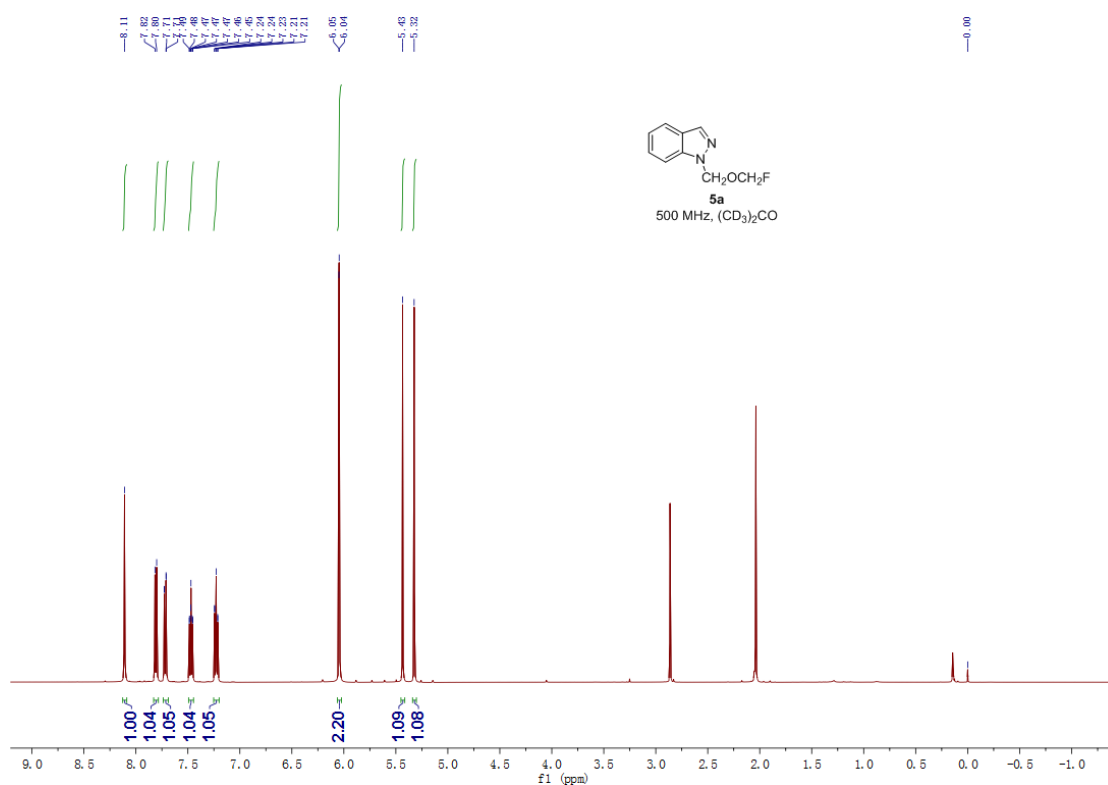

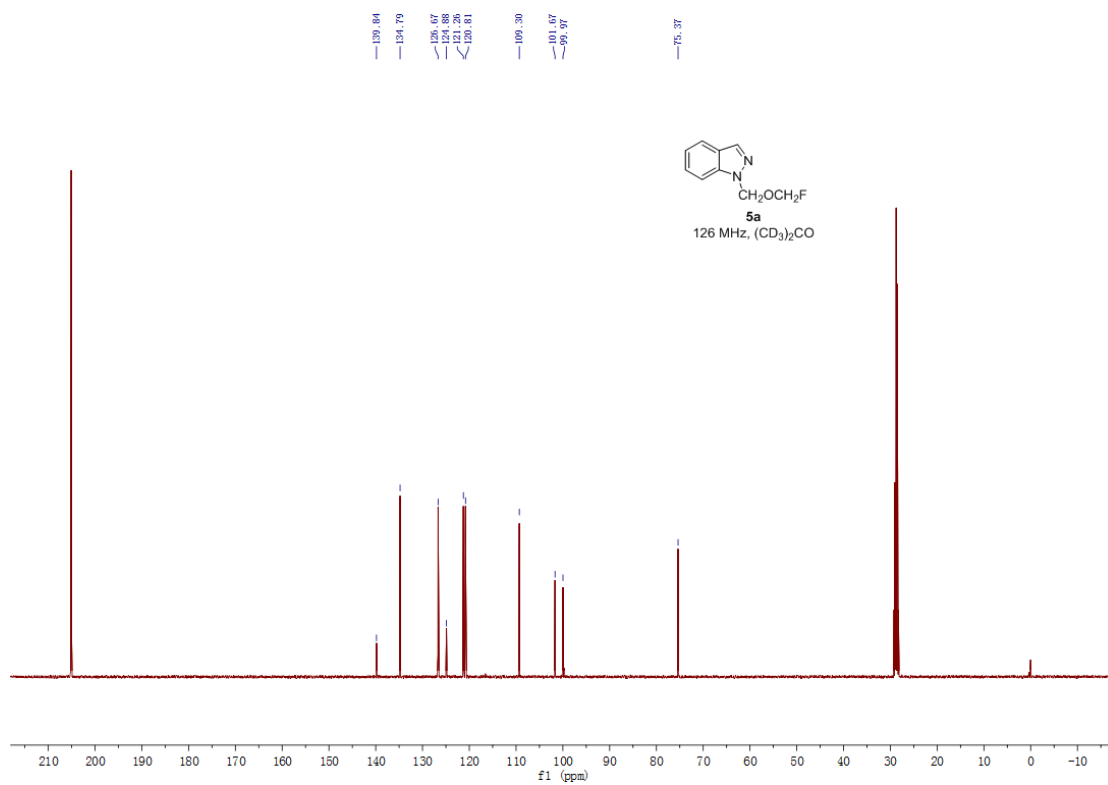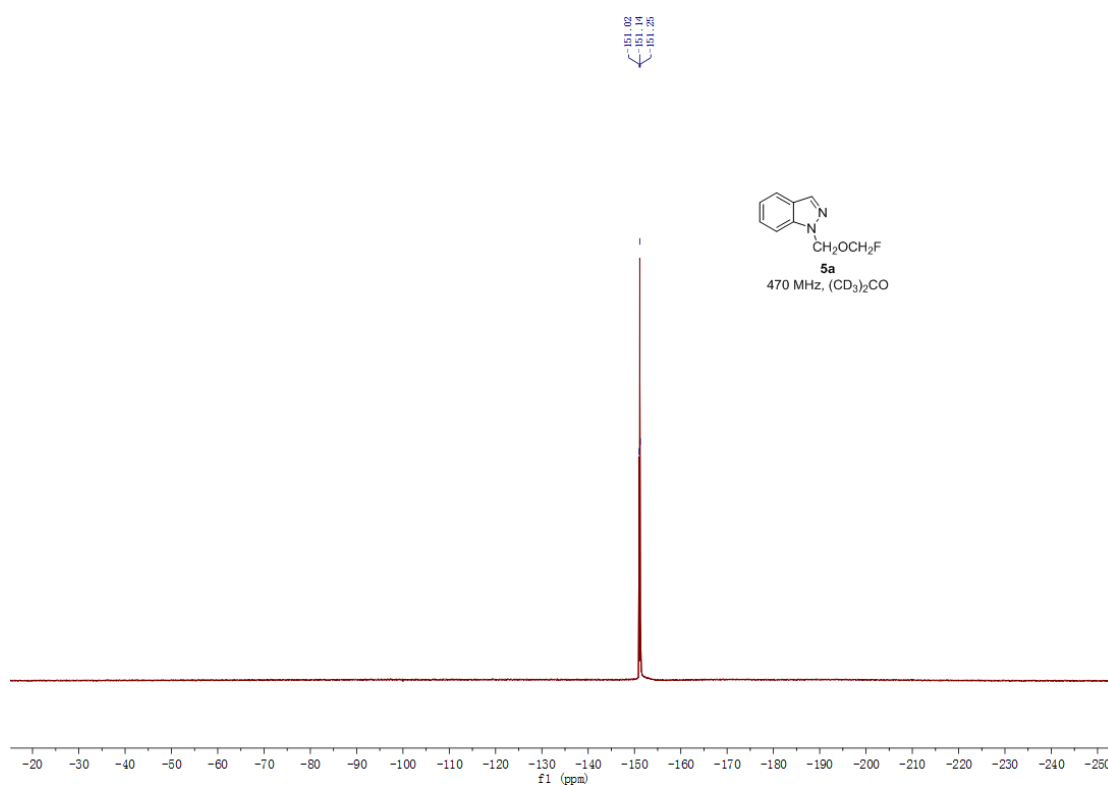

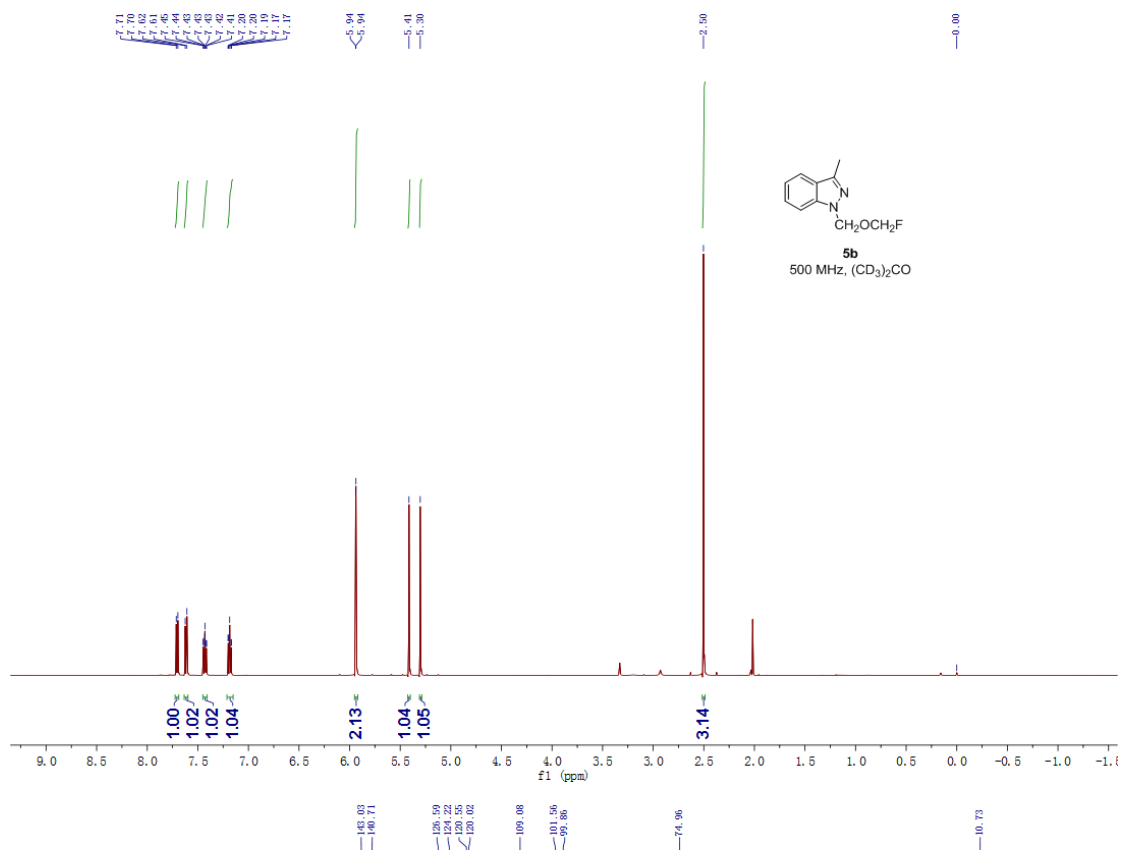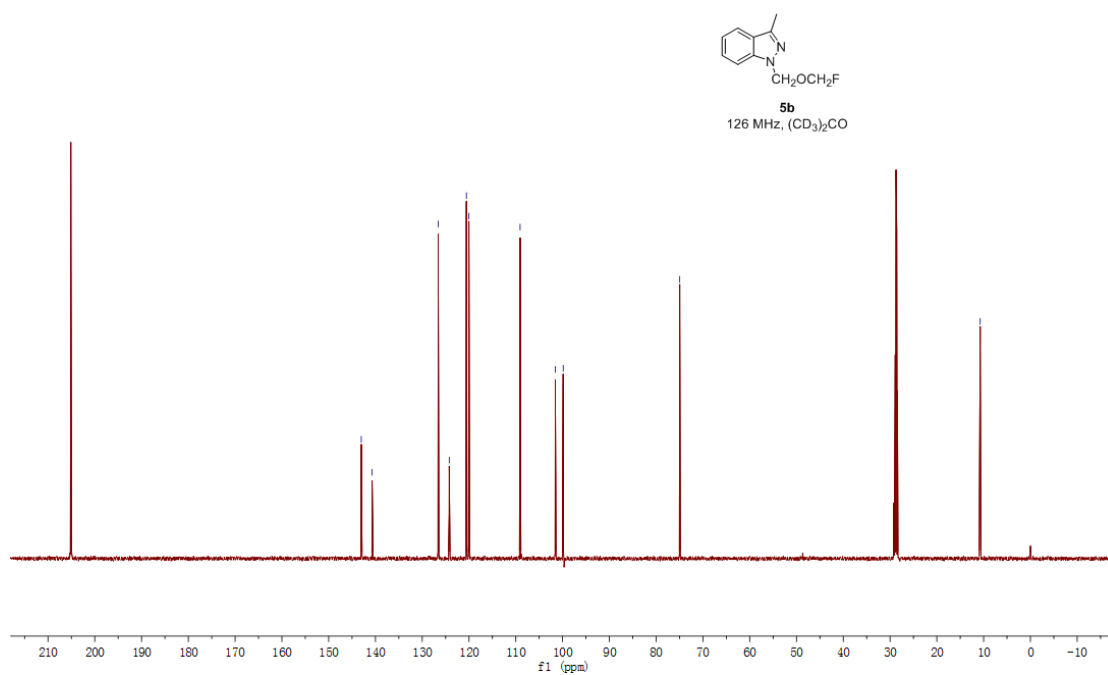

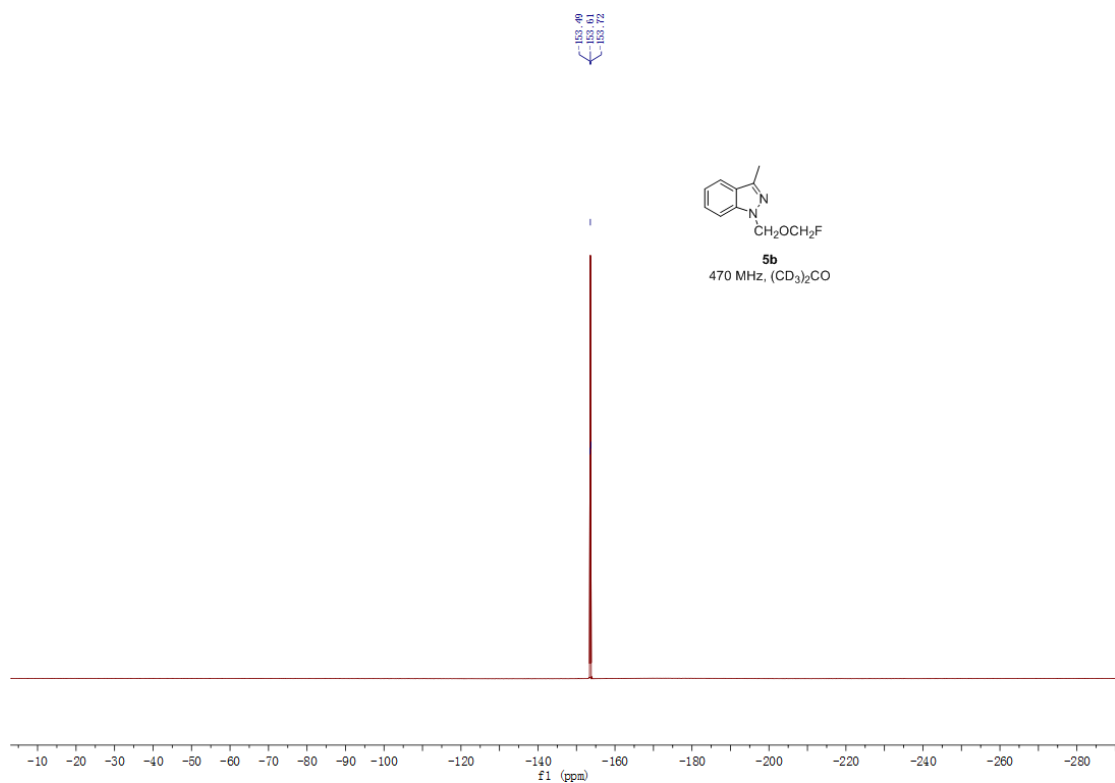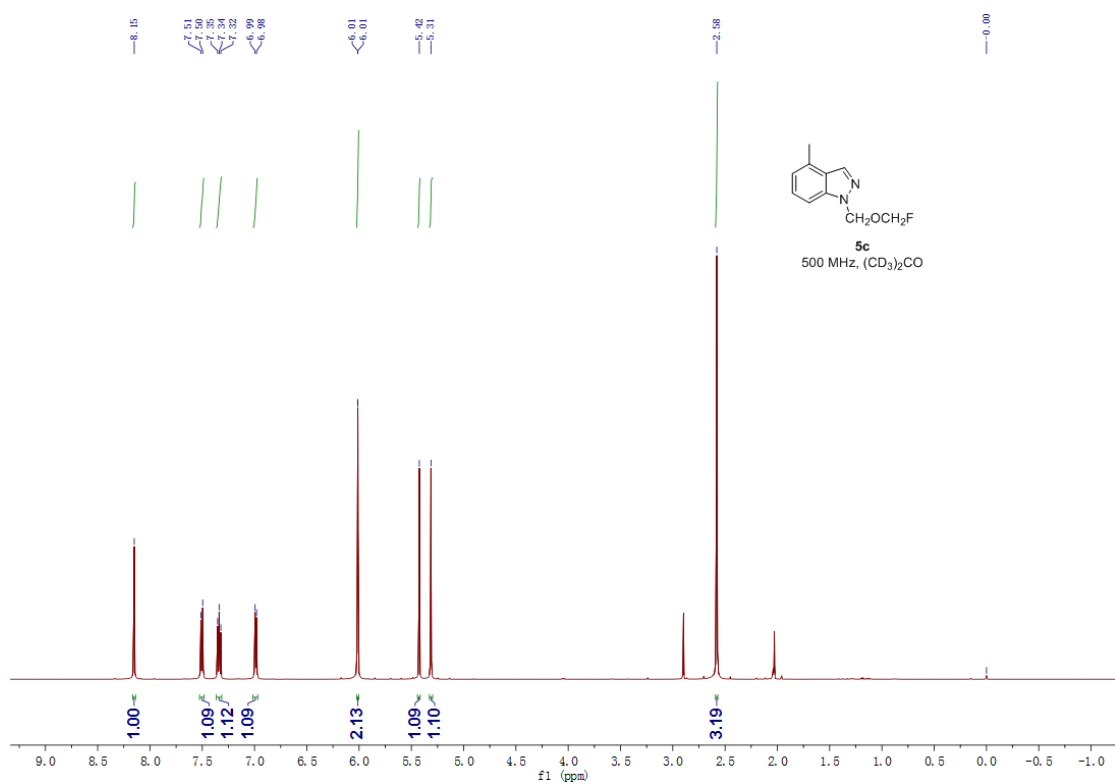

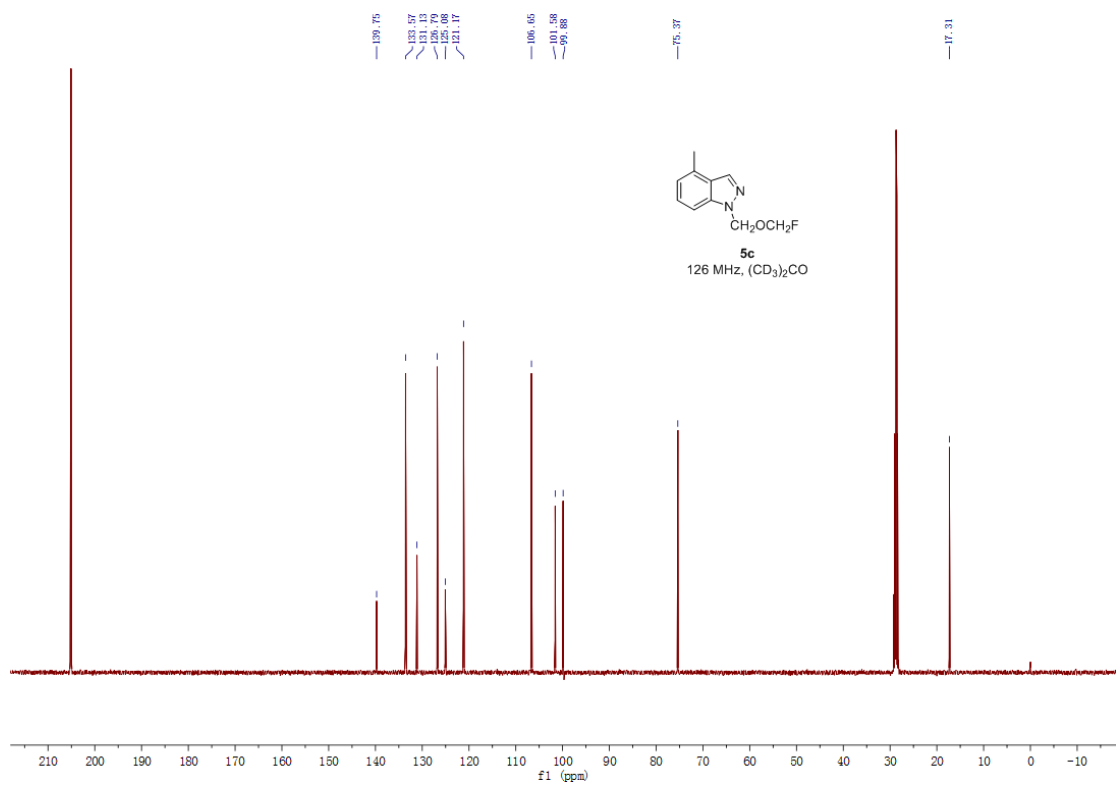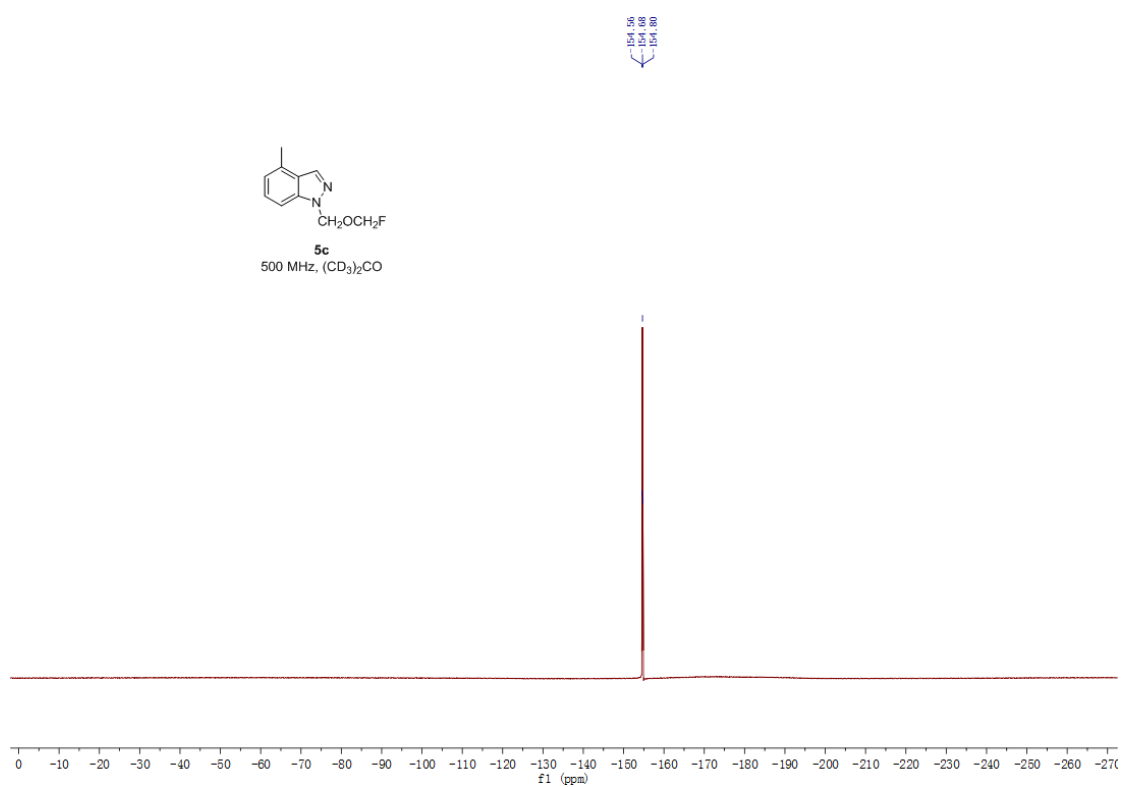

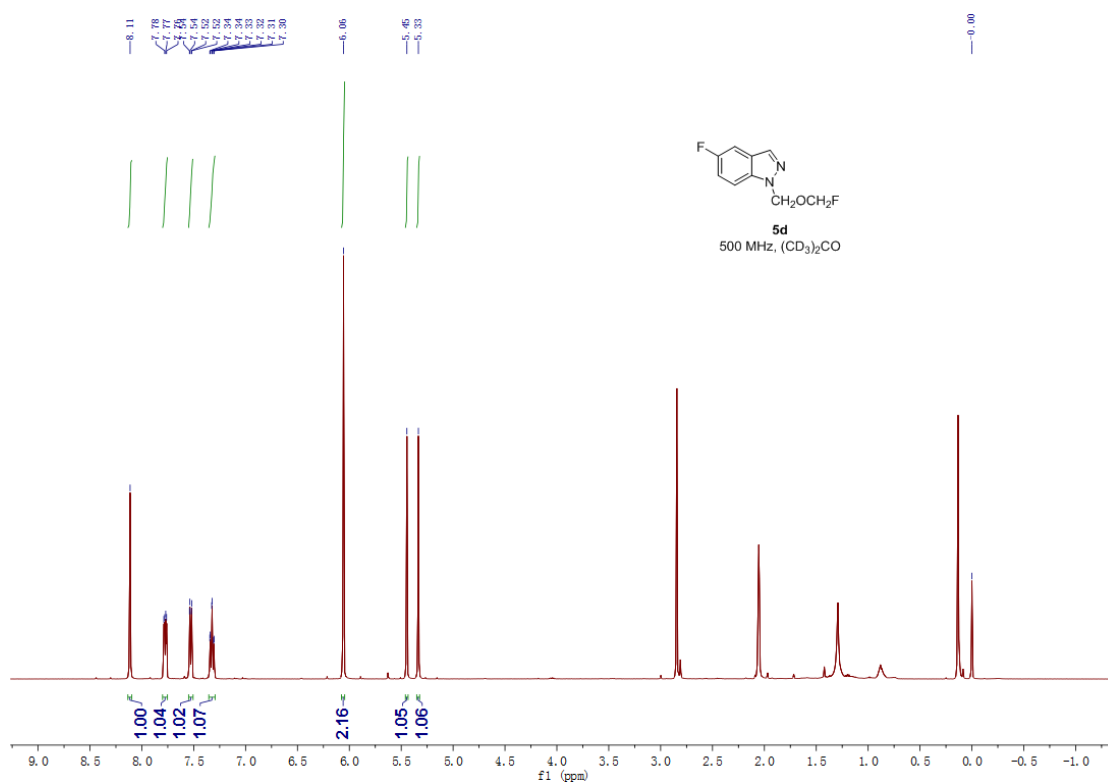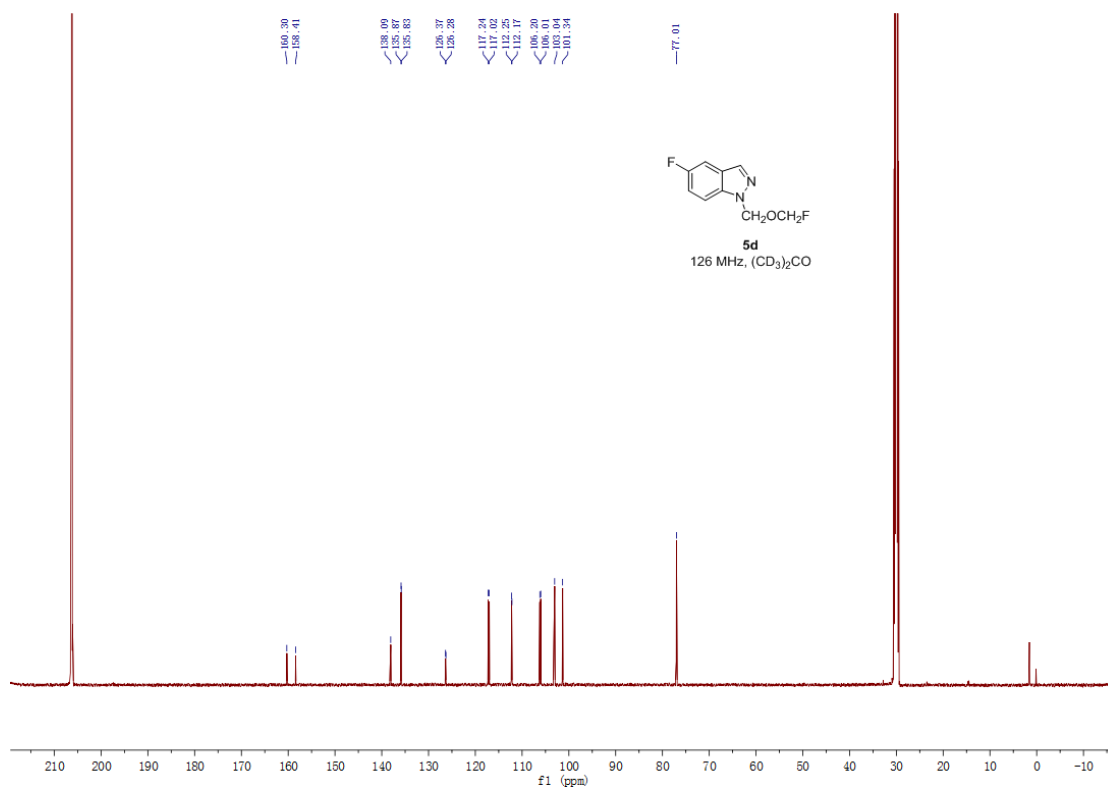

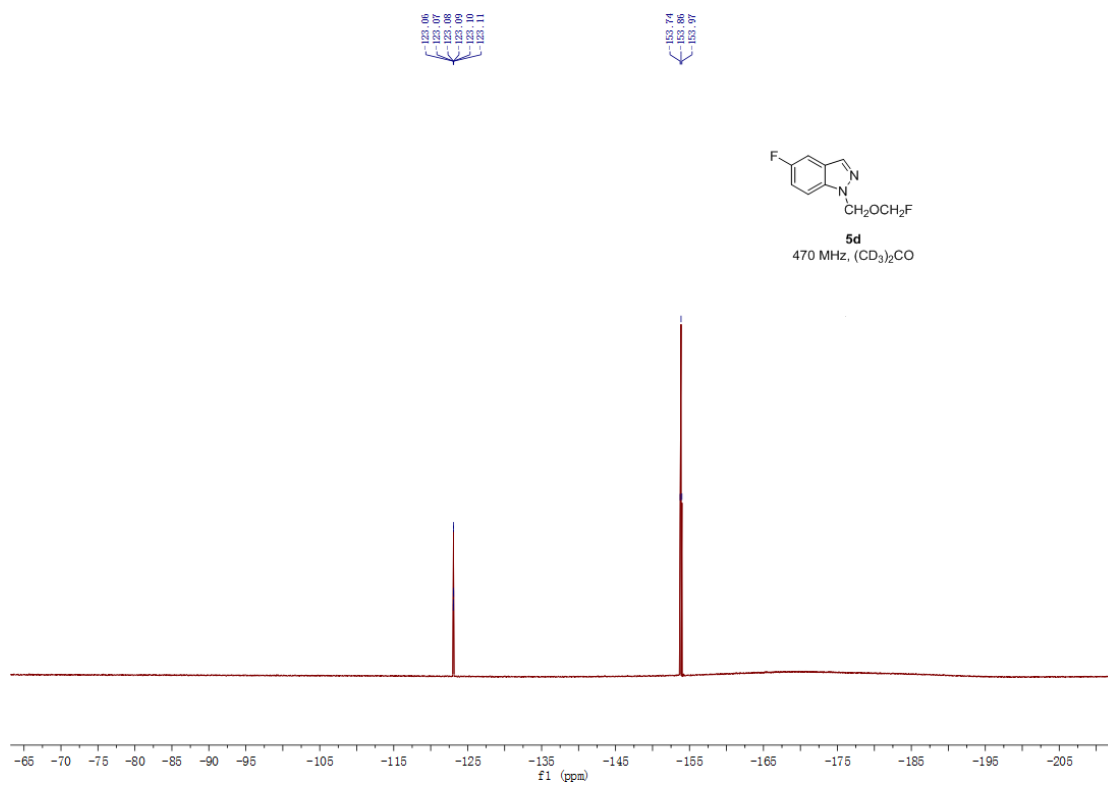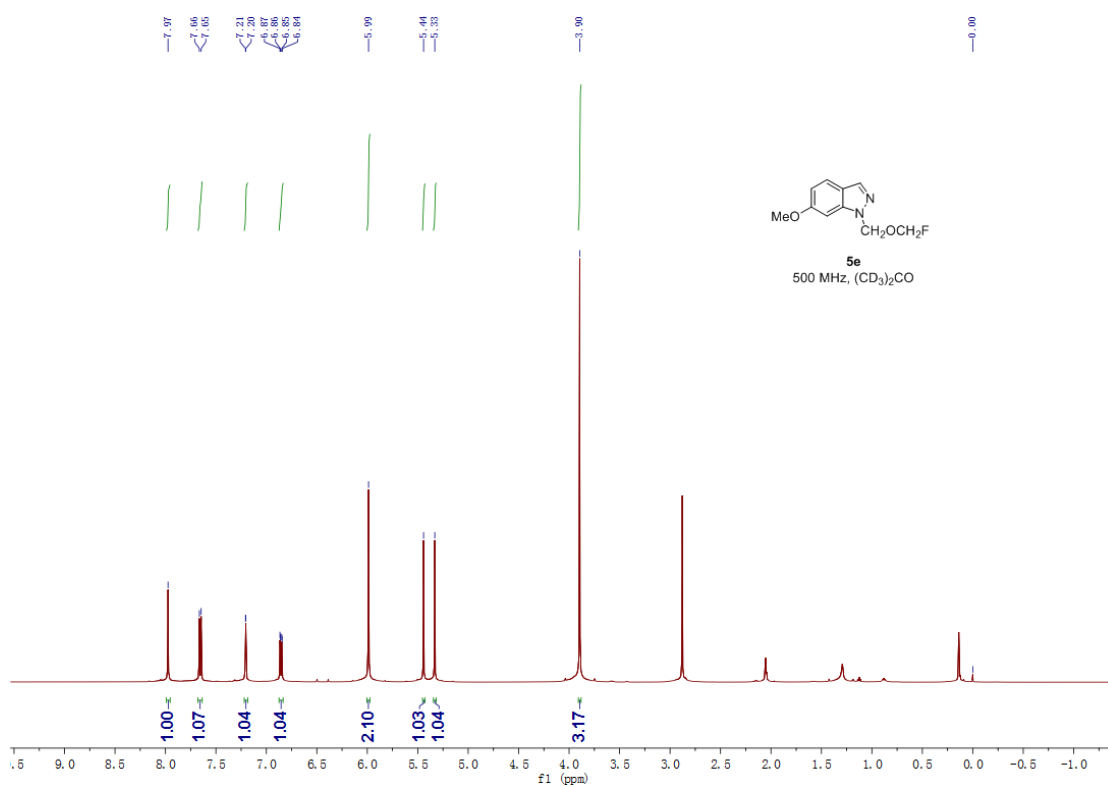

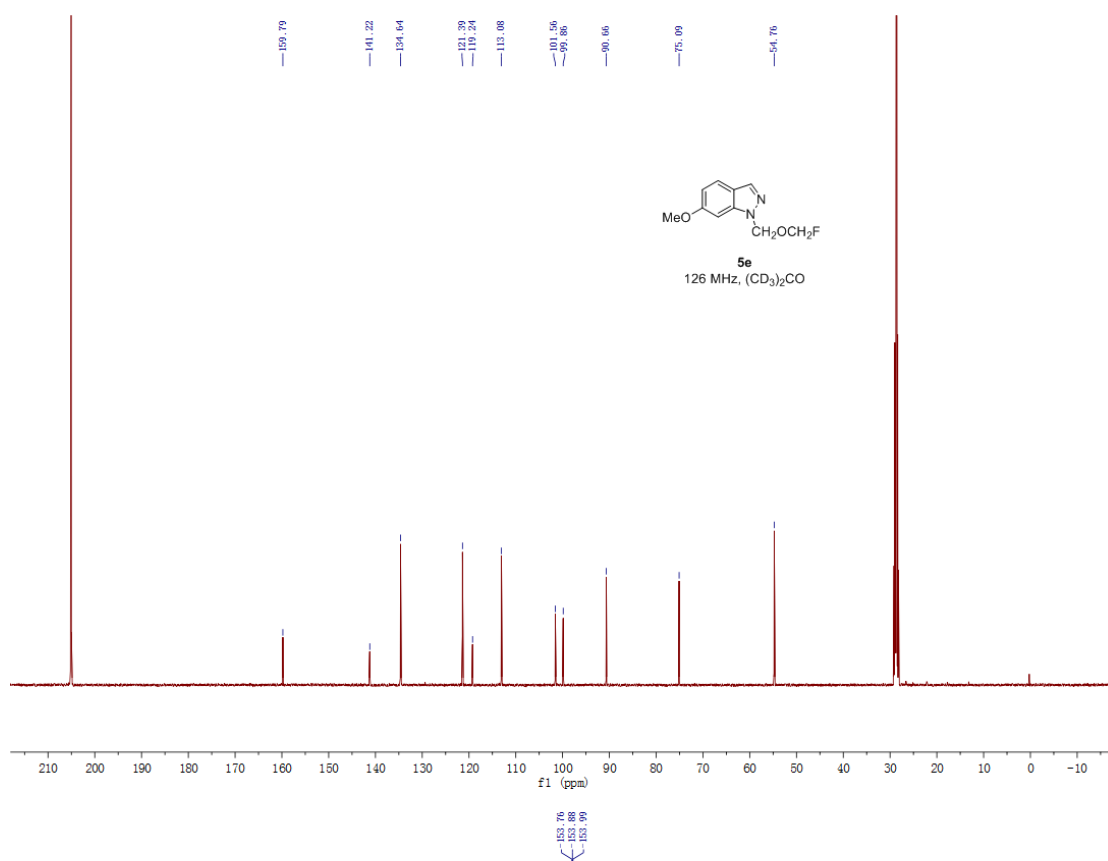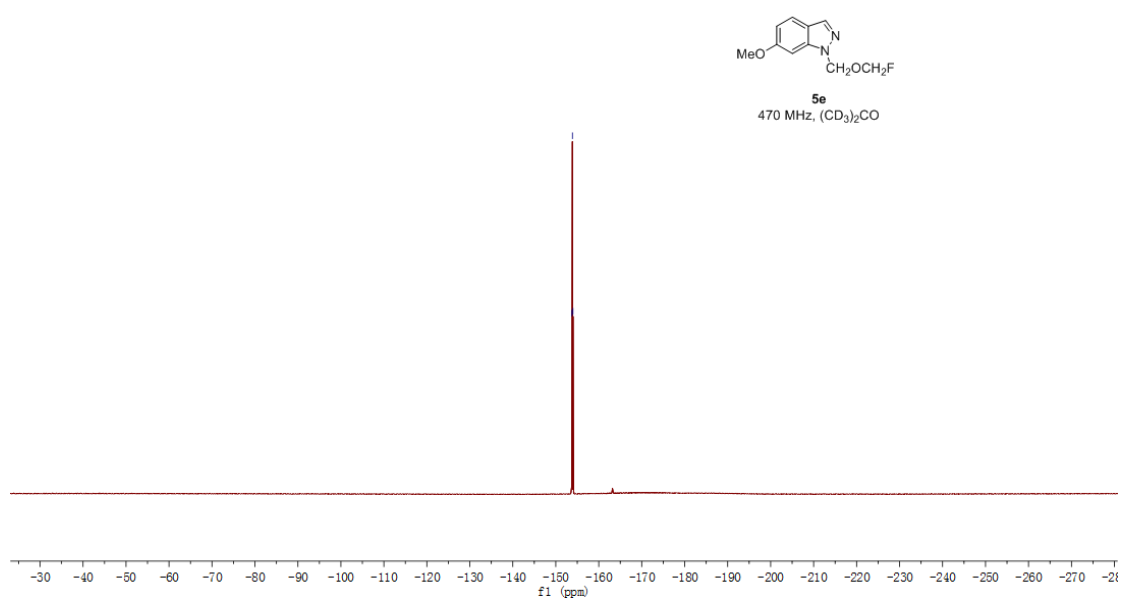

### 3. X-Ray Crystallographic Data of **3q**

The white crystals of **3q** were obtained by using the solvent vapor diffusion method in ether solution. Crystallographic data of complexes was collected at 296 K on a Bruker APEX-II CCD system equipped with graphite-monochromated Mo-K $\alpha$  radiation ( $\lambda = 0.071073$  nm) using  $\omega$ - $\phi$  scan technique. Diffraction data were integrated by the SAINT program, which was also used for intensity corrections for Lorentz and polarization effects. Semi-empirical absorption correction was applied using SADABS. The structures were solved by direct methods and all non-hydrogen atoms were refined anisotropically on  $F^2$  by full-matrix least-squares using the SHELXL-97 crystallographic software package.

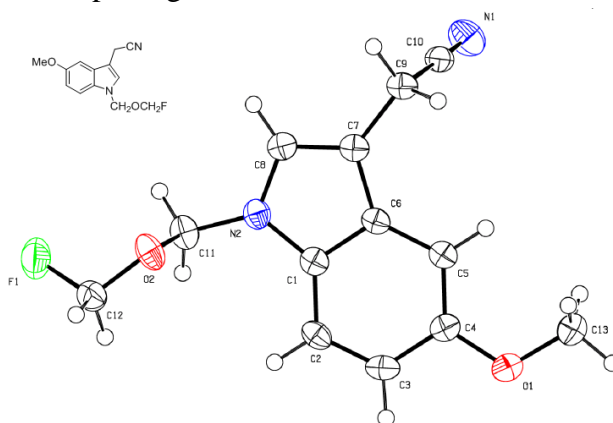

Thermal ellipsoids for **3q** are shown at 50% probability level.

|                                               |                                                                |
|-----------------------------------------------|----------------------------------------------------------------|
| Formula                                       | C <sub>13</sub> H <sub>13</sub> FN <sub>2</sub> O <sub>2</sub> |
| Formula weight                                | 248.25                                                         |
| Crystal system                                | Orthorhombic                                                   |
| space group                                   | <i>P</i> 2 <sub>1</sub>                                        |
| <i>a</i> (Å)                                  | 4.2319(3)                                                      |
| <i>b</i> (Å)                                  | 14.2453(9)                                                     |
| <i>c</i> (Å)                                  | 19.5737(12)                                                    |
| $\alpha$ (°)                                  | 90.00                                                          |
| $\beta$ (°)                                   | 90.00                                                          |
| $\gamma$ (°)                                  | 90.00                                                          |
| Volume(Å <sup>3</sup> )                       | 1179.99(13)                                                    |
| <i>Z</i>                                      | 4                                                              |
| <i>T</i> (K)                                  | 173(2)                                                         |
| <i>D</i> <sub>calcd</sub> (g/m <sup>3</sup> ) | 1.397                                                          |

|                        |                     |
|------------------------|---------------------|
| $F(000)$               | 520                 |
| Reflections collected  | 2065                |
| Unique reflections     | 1900                |
| Goof                   | 1.055               |
| $R_1[I > 2\sigma(I)]$  | 0.0342              |
| $wR_2[I > 2\sigma(I)]$ | 0.0886 <sup>a</sup> |
| CCDC NO.               | 1889210             |

<sup>a</sup>  $w = 1/[\sigma^2(F_0)^2 + (0.0512P)^2 + 0.1488P]$ , where  $P = (F_0^2 + 2F_c^2)/3$ ;
